1  
2  
3  
4  
5  
6  
7  
8  
9  
10  
11  
12  
13  
14  
15  
16  
17  
18  
19  
20  
21  
22  
23  
24  
25  
26  
27  
28  
29  
30  
31  
32  
33  
34  
35  
36

## Wide and Deep Imaging of Neuronal Activities by a Wearable NeuroImager Reveals Premotor Activity in the Whole Motor Cortex

Takuma Kobayashi<sup>1\*</sup>, Tanvir Islam<sup>1</sup>, Masaaki Sato<sup>2,3,4</sup>, Masamichi Ohkura<sup>2,3</sup>, Junichi Nakai<sup>2,3</sup>, Yasunori Hayashi<sup>3,5,6</sup>, Hitoshi Okamoto<sup>1\*</sup>

1. Laboratory for Neural Circuit Dynamics of Decision Making, RIKEN Center for Brain Science, Wako, Saitama 351-0198, Japan

2. Graduate School of Science and Engineering, Saitama University, Saitama, 338-8570, Japan

3. Brain and Body System Science Institute, Saitama University, Saitama, 338-8570, Japan

4. Laboratory for Mental Biology, Brain Science Institute, RIKEN, Wako, Saitama 351-0198, Japan

5. RIKEN Center for Brain Science, Wako, Saitama 351-0198, Japan

6. Department of Pharmacology, Kyoto University Graduate School of Medicine, Kyoto 606-8501, Japan

\*Corresponding author. Tel.: +81 48 467 9713; Fax.: +81 48 467 9714.

E-mail address: [takuma.kobayashi@riken.jp](mailto:takuma.kobayashi@riken.jp); [dr.takuma.kobayashi@gmail.com](mailto:dr.takuma.kobayashi@gmail.com)

(T. Kobayashi), [hitoshi.okamoto@riken.jp](mailto:hitoshi.okamoto@riken.jp) (H. Okamoto)

### Author Contributions:

H.O. and T.K. conceived and designed the research, and wrote the paper. T.K. constructed the imaging system and the experimental apparatus, and performed all experiments. T.I. performed NMF. M.S., M.O., J.N. and Y.H. made the G-CaMP7 transgenic mouse lines.

**Competing Financial Interests Statement:** The authors declare no competing financial interests.

37 **Summary**

38

39       Wearable technologies for functional whole brain imaging in freely moving  
40 animals would advance our understanding of cognitive processing and adaptive  
41 behavior. Fluorescence imaging can visualize the activity of individual neurons in  
42 real time, but conventional microscopes have limited sample coverage in both  
43 the width and depth of view. Here we developed a novel head-mounted laser  
44 camera (HLC) with macro and deep-focus lenses that enable fluorescence  
45 imaging at cellular resolution for comprehensive imaging in mice expressing a  
46 layer- and cell type-specific calcium probe. We visualized orientation selectivity  
47 in individual excitatory neurons across the whole visual cortex of one  
48 hemisphere, and cell assembly expressing the premotor activity that precedes  
49 voluntary movement across the motor cortex of both hemispheres. Including  
50 options for multiplex and wireless interfaces, our wearable, wide- and  
51 deep-imaging HLC technology could enable simple and economical mapping of  
52 neuronal populations underlying cognition and behavior.

53

54

55

56

## 57 1. Introduction

58

59 Wearable imaging instruments represent an emerging class of powerful and  
60 versatile measurement tools for *in vivo* functional analysis of the brain in freely  
61 moving animals<sup>1-4</sup>. Wearable microscopes such as head-mounted 2-photon  
62 microscopes, miniature endoscopes, fiber photometers, and other implantable  
63 devices have already made significant contributions in neuroscience<sup>5-9</sup>. Many of  
64 these instruments also incorporate recent improvements in fluorescent probe  
65 technology, such as the genetically encoded Ca<sup>2+</sup> indicators<sup>10-13</sup>, which enable  
66 long-period, real-time imaging of neuronal activity at high signal-to-noise ratios in  
67 the living animal brain. Despite such advances, wide-field imaging of  
68 cortico-cortical inter-regional interactions at high spatiotemporal resolution  
69 remains difficult. Most current instruments only allow the capture of images from  
70 a single or limited number of focal planes. Also, because ongoing animal  
71 movement often breaks the instrument, continuation of the experiment can be  
72 difficult if a device is too delicate and expensive to obtain replacements. To  
73 address these problems, we developed a novel wearable fluorescence imaging  
74 system containing a head-mounted laser camera (HLC) with deep-focus and  
75 macro photographic lenses that can comprehensively analyze neuronal activity  
76 in the mouse cerebral cortex.

77 Traditionally, researchers have attempted to improve microscopic optics to  
78 obtain wider and deeper fields of view under the restricting design conditions of  
79 a defined focal plane and optical aberration correction. Here, we tried to achieve  
80 the same goal, but with an alternative approach using a deep-focus optical  
81 system that can integrate images of objects at different depths and perspectives  
82 into a single-plane image. This apparatus adopts an optical system similar to the  
83 one used in inexpensive compact cameras and smart cellular phones, thereby  
84 allowing us to obtain images similar to the z-stack images of multiple focal  
85 planes produced by two-photon laser microscopy. Many types of camera  
86 modules are commercially available, thus we could manufacture a compact HLC  
87 imaging system on a purpose-built or mass-production commercial scale, and  
88 within a reasonable budget.

89 In this study, we used a hand-made HLC for *in vitro* and *in vivo* fluorescence  
90 Ca<sup>2+</sup> imaging to assess whether physiological neuronal activity could be  
91 visualized over a wide view in the deep cortical layers of a freely moving mouse.  
92 We also show that we can resolve the information of activities of individual cells

93 by application of proper image processing algorithm. First, we imaged individual  
94 neurons with orientation selectivity in the visual cortex to analyze cellular  
95 physiology, and second, we applied the HLC to identify the cellular assembly  
96 used for premotor activity during the planning phase before the initiation of  
97 voluntary movement in the motor cortex of both hemispheres.

98

99

100

## 101 **2. Results**

102

103 2.1 Development of a wearable instrument for fluorescence imaging of neural  
104 activity in the cerebral cortex.

105

106 **Figure 1** demonstrates our wearable fluorescence imaging system  
107 developed to visualize neural activity in the cerebral cortex of freely moving mice  
108 (left panel in **Fig. 1a, b**, **Methods section**; surgical method is explained in  
109 **Supplementary Fig. 1a**). The wearable apparatus consists of a separable  
110 camera and a spacer with a cranial window at its base. Imaging of the cortex is  
111 performed by the camera component through the cranial window. The object  
112 plate of the cranial window makes direct contact with the surface of the cortex  
113 (**Fig. 1b**). Repeated imaging of a specific brain area can be easily carried out  
114 while housing the mouse for a long period (**Supplementary Fig. 1b**). By  
115 equipping a suitable excitation light source and an absorption filter, the HLC can  
116 perform imaging for green or red fluorescence (right panels in **Fig. 1a**). The HLC  
117 is compact and lightweight, and therefore does not impede an animal's normal  
118 behavior (**Fig. 1c**, **Supplementary Movie 1**). We confirmed that the imaging of  
119 neuronal activities by the HLC attached to the head of freely moving mice  
120 causes no significant increase of stress, and does not affect the locomotor  
121 activity and the behavioral pattern (**Supplementary Fig. 2**).

122 Additionally, multiple cameras can be attached to the heads of small mice  
123 such as the C57BL/6 line (**Fig. 1c**, **Supplementary Fig. 1c-e**) to enable the  
124 simultaneous imaging of multiple loci, which previously has proved difficult.  
125 Importantly, since the wearable HLC is robustly fixed to the mouse skull, normal  
126 body movements do not perturb the wide-view fluorescence imaging (**Fig. 1d**,  
127 **Supplementary Movie 2**). The number of blinking spots representing  
128 presumptive cellular elements in the field of view in **Fig. 1d** was estimated at

129 approximately 10,000 (Supplementary Fig. 3, Supplementary Movie 3).

130 We used a laser diode (LD) in the HLC as an excitation light source. Thus,  
131 to prevent possible temperature increases in the diode due to continuous lighting  
132 during long-term imaging, we tested an LD driver with an attached pulse  
133 generator to toggle the LD on and off (Supplementary Fig. 4a) and heat sinks of  
134 different sizes. This modified design seemed to effectively suppress temperature  
135 changes in the LD that could adversely affect the neuronal imaging  
136 (Supplementary Fig. 4b-f). Furthermore, pulse driving strengthens the laser light,  
137 and such an integrated light source makes the system more adaptable to  
138 wireless control than one dependent on an external light source via optical fiber  
139 (Supplementary Fig. 5). Therefore, the HLC imaging system is suitable for use  
140 on constantly moving animals by using either wired or wireless transmission  
141 because the number of output channels is small enough to allow a USB  
142 connection and low electric power consumption with a CMOS image sensor.

143 Before moving to *in vivo* imaging, the *in vitro* optical specifications of the  
144 HLC were investigated (Fig. 2a-f, Methods section). A checkerboard chart (Fig.  
145 2a, b) or a line chart (Fig. 2c-f) was captured by the HLC, and each optical  
146 parameter was calculated based on the actual measurement values. As a result,  
147 a maximum spatial resolution 4.17  $\mu\text{m}/\text{pixel}$  was obtained if the blurring of edges  
148 in the images were ignored (Fig. 2a). The optical distortion was 2.78% at  
149 maximum (television distortion = 3.91%), and the depth of field exceeded 19.5  
150 mm (see Methods section for details of the calculations).

151 Next, the optical processing conditions for homogenizing the flat irradiation  
152 shape of a coherent laser beam emitted by the LD were examined using a  
153 light-shaping diffuser (LSD) (Fig. 2g, h, Supplementary Fig. 4g, h). Based on  
154 actual measurements using various types of LSD (Fig. 2h) and comparison with  
155 the theoretical value with simulation (Supplementary Fig. 4g, h), a 60 x 10  
156 degree LSD was found to be the most preferable. Accordingly, we expected that  
157 the HLC equipped with a deep-focus optical system could capture images from  
158 wide brain areas and various depths at quasi-cellular resolution.

159 To verify the imaging ability of the HLC, *in vitro* and *in vivo*  
160 fluorescence-imaging tests were performed. First, images of the fluorescent  
161 beads implanted into the cerebral cortex of the mouse were compared between  
162 the HLC and a conventional stereomicroscope (Fig. 3a-c). The HLC, but not the  
163 conventional stereomicroscope could detect beads of similar size to cells in the  
164 deep cortex even at 800  $\mu\text{m}$  in depth (Fig. 3d, e). Additionally, the deep-position

165 HLC images showed less blurring of the bead shapes than those taken by  
166 stereomicroscope (Fig. 3f). The findings indicate that the HLC can acquire  
167 fluorescence signals deep in the cerebral cortex at high precision compared to a  
168 conventional wide-field fluorescence microscope. Second, the  $\text{Ca}^{2+}$  imaging was  
169 performed with 3D cultured cells made by embedding transfected Hela cells in  
170 an extracellular matrix gel as a mock brain tissue (Fig. 4a). The change ratios  
171 ( $\Delta F/F$ ) of the fluorescence intensity (FI) of individual cells at various depths  
172 increased with histamine administration, whereas they were decreased by EGTA  
173 administration (Fig. 4b, Supplementary Fig. 6a, Supplementary Movie 4). The  
174 results indicate that the  $\text{Ca}^{2+}$  imaging of individual cells could be performed in a  
175 3D cell culture using the HLC.

176 The spacer part of the device with the cranial window is also useful to  
177 observe the cortex under a conventional or 2-photon microscope system  
178 (Supplementary Fig. 7, Supplementary Movie 5); however, a major advantage of  
179 the HLC in this regard is that a large amount of information can be obtained from  
180 a single image in real time compared to scanning multiple focal planes as  
181 needed for the same results by confocal or 2-photon laser microscopy systems.  
182 Furthermore, by using transgenic animals expressing the  $\text{Ca}^{2+}$  indicator  
183 fluorescent proteins in layer- or cell type-specific manners, we also obtained  
184 images from defined subpopulations of neurons in the brain regardless of their  
185 distribution areas. As two examples in the present study, CaMK2a-G-CaMP7  
186 mice expressing G-CaMP specifically in excitatory neurons (Fig. 5, 6,  
187 Supplementary Fig. 7-9) and Thy1-G-CaMP7 mice expressing G-CaMP  
188 predominantly in layer 5/6 pyramidal neurons were imaged (Fig. 4c, d,  
189 Supplementary Fig. 6c).

190 For  $\text{Ca}^{2+}$  imaging of the Thy1-G-CaMP7 mouse by the HLC, we applied an  
191 electrical tetanus stimulation to the somatosensory area, and observed an  
192 increased FI around the electrode in the transgenic mouse, whereas no such  
193 evoked signals were detected in a control wild-type mouse (Fig. 4c, d,  
194 Supplementary Fig. 6c, Supplementary Movie 6). In Supplementary Movie 6, the  
195 HLC was placed on the surface of the cortex without fixing it to the cranial bone.  
196 Therefore, the image shows slight vibrations due to the muscle movement  
197 induced indirectly by stimulation of the somatosensory area, even under  
198 anesthesia. The imaging result indicates that HLC can visualize the evoked  
199 activity of cortical neurons located as deep as layer 5/6.

200

201 2.2 The HLC can detect physiological neuronal activity at cellular resolution in  
202 the cerebral cortex including the visual area of one hemisphere in freely moving  
203 mice.

204

205 To demonstrate the validity of the HLC, physiological responses of individual  
206 neurons during visual perceptual information processing were observed by  $\text{Ca}^{2+}$   
207 imaging in freely moving CaMK2a-G-CaMP7 mice (Fig. 5-7).

208 By twisting the lens barrel of the camera part of the HLC, the HLC can  
209 obtain either a narrow or wide field of view arbitrarily (Fig. 2a, b, Methods  
210 section). A short spacer was used to compensate for the reduction in the working  
211 distance by optical zooming (Fig. 5a-c). Under the freely moving condition,  $\text{Ca}^{2+}$   
212 imaging was performed on the visual cortex of the CaMK2a-G-CaMP7 mouse  
213 (Fig. 5d, e, Supplementary Movie 7). As a result, the neuronal activity of the  
214 visual cortex can be visualized when the mouse was viewing the surrounding  
215 scenery, and the vibration derived from mouse's behavior was not observed and  
216 the view field did not drift because of the firm attachment of the HLC to the head.  
217 It can be noted that the detection of cells with partial overlap in XY plane but  
218 separated in Z axis can raise the possibility of simultaneous recording of cells  
219 from various layers of the cortex. To address this problem, we deconvoluted the  
220 signals of overlapping cells individually by using a NMF (Non-negative Matrix  
221 Factorization) algorithm<sup>14</sup> (Fig. 6, Methods section). As a result, 685 cells and  
222 their activities were detected in the magnified 600 x 800  $\mu\text{m}$  image (Fig. 6c, d).  
223 The HLC captures signals from cells at various depths, superimposed in one  
224 plane. Though it is not possible to exactly determine the depth of the cells from  
225 the surface with the current HLC, we can roughly assume that cells with higher  
226 baseline activities may be located on shallower depth from the surface and  
227 reconstruct the putative distribution of cells in 3D (Fig. 6e, f).

228 Next, to examine the differences in physiological responses to different  
229 stimuli, a 0.1-second (sec) single flashlight stimulation or 10 repeats of a 0.5-sec  
230 flashlight stimulus (light on, 25 ms; light off, 25 ms; 10 times), was applied to the  
231 mouse by using an LED positioned in front of the left eye (Methods section).  
232 Transient increases (av. 0.50 sec, SD  $\pm$  0.14) in FI were observed at 12  
233 fluorescence spots in the primary visual cortex (V1) when a flash stimulation was  
234 applied (Fig. 7b), whereas gradual increases in the FI of 7 spots were observed  
235 over a longer period (av. 1.09 sec., SD =  $\pm$  0.41) during and after repeated flash  
236 stimuli (Fig. 7c). The  $\Delta F/F$  at places other than the visual area, considered to

237 represent basal brain activity irrelevant to visual information processing, showed  
238 a fluctuation within 3% maximal FI (black line in the graph). No significant  
239 increases of the  $\Delta F/F$  at these places (black line) during the light stimulus mean  
240 that no external light was incident on the imaging area and supports the  
241 correctness of the experimental results. Evidently, the transient, significant  
242 increases of fluorescence in the visual cortex were caused by neuronal activity,  
243 and such increases were strong and long depending on the stimulation time.  
244 These results demonstrate that the HLC can differentiate the neuronal  
245 responses to different stimuli.

246 The complex cells in the primary visual cortex in cats show specific  
247 orientation selectivity in response to the specific directions of scanning light  
248 stimuli<sup>15</sup>. In rodents, the orientation selectivity is represented mainly in layer 2/3  
249 neurons, although minor responses are also observed in the geniculate afferent  
250 fibers<sup>16,17</sup>. The neurons with orientation selectivity are also randomly distributed  
251 in the visual cortex of rodents, thus we examined whether the HLC could detect  
252 such neuronal activity within the visual cortex of mice.

253 An 8-direction drifting grating was presented to the mice, and  $\text{Ca}^{2+}$  imaging  
254 was performed (Fig. 7a, Methods section). A transient, strong increase in FI was  
255 detected at the specific light spots in V1 only when a specifically orientated  
256 grating was presented (Fig. 7d). The left column graphs indicate the examples of  
257 the 15 light spots that responded robustly to 0 and 180-degree stripes (asterisks),  
258 and did not respond at all to 90 and 270 degrees. In contrast the right column  
259 graphs indicate the examples of the 12 light spots that responded robustly to 90-  
260 and 270-degree stripes (asterisks), while none of them responded to 0 and 180  
261 degrees. We further analyzed the orientation specificity of all ROIs of the  
262 observed area (Fig. 7e-g, see Methods for details). The responding light spots  
263 could therefore represent neurons with specific orientation selectivity. Thus, the  
264 HLC enables a broad-volume analysis of the physiological activity of single  
265 neurons in the cerebral cortex.

266

267 2.3 Functional neuronal imaging of the whole motor cortical area reveals specific  
268 patterns of premotor activity representing discrete neuronal assemblies.

269

270 We next explored the advantages of the wearable instrument for the  
271 analysis of brain activity in freely behaving subjects, including movement. For  
272 this purpose, the entire motor cortex area of a mouse was exposed on the



273 surface of the brain, such that the HLC could visualize the entire area in both  
274 hemispheres simultaneously.  $\text{Ca}^{2+}$  imaging of CaMK2a-G-CaMP mice was  
275 performed using the HLC in the frontal cortical area including the motor cortex of  
276 freely moving animals ([Supplementary Fig. 8](#)). Different patterns of neuronal  
277 activity were elicited depending on different external stimulations of the acoustic  
278 and somatosensory modalities. Among those event-related responses,  
279 synchronized and slow wavelike activities were observed across broad areas  
280 while the mouse was standing still after the stimulation ([Supplementary Movie](#)  
281 [8](#)).

282 The pre-motor readiness potential (RP) originally reported as a  
283 *bereitschaftspotential*, is a neuronal premotor activity elicited in the motor  
284 cortical area before the initiation of voluntary muscle movement<sup>18</sup>. The RP  
285 thought to occur in the higher motor cortex earlier than nerve activity to move the  
286 muscle is presumed to be the reflection of the animal's intention to move the  
287 body<sup>19,20</sup>. The premotor activity for an unintended action is categorized as a  
288 Type-II RP (no preplanning) while the larger premotor activity for an intended  
289 action is distinguished as the Type-I RP (preplanned act); however, it is difficult  
290 to analyze premotor activity induced by the random behavior of animals, and the  
291 observation of a part of the motor cortex alone cannot reveal the entirety of this  
292 premotor activity. Therefore, in the present study, we attempted to measure  
293 neuronal activity in the whole motor cortical area of the mouse during voluntary  
294 movement to verify that a specific cell assembly expressing the readiness  
295 potential might exist.

296 We developed what we term "restriction motion experiment" to easily detect  
297 the activity associated with a specific movement ([Fig. 8, Methods section](#)). In this  
298 study, a mouse with the HLC on its head was restrained in a plastic tube with its  
299 four legs attached to splints set up for monitoring leg movements ([Fig. 8a, b](#)).  
300 Brain activity preceding the actual execution of exercise, *i.e.*, the readiness  
301 potential, is proposed to occur in the motor cortical area<sup>18</sup>, thus we sought to  
302 confirm this observation using the HLC on our mouse subjects. Using the  
303 movement of a lever as an index, the neuronal activities in bilateral motor  
304 cortices were extracted immediately before and after the onset of a specific  
305 movement ([Fig. 8c, d](#)). First, the locations of neurons activated before and/or  
306 after the initiation of motion in the left or right hindleg were either established  
307 from raw imaging data by visual judgment of the experimenter ([Supplementary](#)  
308 [Movie 8](#)) or were extracted with a cross-correlation method ([Supplementary Fig.](#)

309 [9a](#)). As a result, activity in the M2 area on the contralateral side was higher than  
310 that on the ipsilateral side ([Supplementary Fig. 9a](#)). Therefore, the right and left  
311 hindleg movement accompanied the premotor neuronal activity mainly on the  
312 contralateral side of the cortical area, which roughly matches the hindleg  
313 position in the secondary motor cortex as estimated previously<sup>21</sup>. However, both  
314 these detection methods have intrinsic problems, as visual judgment can easily  
315 miss important signals, and screening by cross-correlation can also miss the  
316 responses of neurons that do not appear in every trial, but may still be  
317 physiologically important. Thus, a more comprehensive quantitative analysis  
318 was sought by merging the image data of multiple events (11 left leg kicks, 10  
319 right leg kicks). The maximum FI value during the period (3 sec) before or after  
320 the kick was identified for each pixel, and then this value for each pixel was  
321 subtracted by the maximum FI value of the same pixel during three 6-sec  
322 periods with no leg movement. The subtracted maximum FI value for each pixel  
323 was mapped in the right column images of [Fig. 8e](#) where the timing of the  
324 emergence of each maximum value was color-coded either in green or red  
325 depending on whether it appeared before or after the initiation of leg movement,  
326 respectively. We further took into account the frequency of these peaks  
327 appearing in all kick events, and [Fig. 8f](#) shows the time windows before or after  
328 the initiation of leg movement during which each peak appeared (see  
329 [Supplementary Fig. 9b, c](#) for the detailed process). Different levels of color  
330 intensity represent the frequency of appearance, and the different colors  
331 represent the timing of the maximum peaks. These results also support the  
332 conclusion that leg motion is preceded by premotor activity mainly in the  
333 contralateral M2 area as a starting point, and as shown here, the activity started  
334 within a period of between -2 sec and -1 sec. This timing supports results using  
335 the other methods described above, although the distribution does not strictly  
336 follow the conventional M1/M2 division, with the activity propagating from the  
337 anterior to the posterior poles and from contralateral to bilateral areas broadly.  
338 Further qualitative analysis also supported these results ([Supplementary Fig.](#)  
339 [9d-g](#)), with a cell grouping method based on raw imaging data across the entire  
340 motor cortex finding that the cell assembly presenting the pre-motor activities is  
341 the main contributor of the lateralized activities both before and after a specific  
342 movement (middle graphs of [Supplementary Fig. 9d, e](#)). This result suggests  
343 that the lateralized activity of the premotor active cell assembly ensures the later  
344 lateralized motion. In conclusion, these results indicate that the HLC can

345 visualize specific cell assemblies representing premotor activity in the whole  
346 motor cortex (Fig. 8g).

347

348

349

### 350 **3. Discussion**

351

352 In this study, we describe a wearable imaging system with wide-field,  
353 deep-focus optical capabilities that will enable comprehensive physiological  
354 analyses of the broad and deep area making up the cerebral cortex. By  
355 application of proper image processing algorithm such as NMF, we can also  
356 resolve the information of activities of individual cells. In particular, long and  
357 continuous (in one day) or longitudinal (over multiple days) observation of the  
358 brain in the same individual under free-moving conditions can be performed  
359 easily with the HLC. In fact, we observed the light response of the neurons in the  
360 visual cortex over multiple days (day1 and 18, or day 11 and 20 after operation).  
361 These advantages make the HLC an easy-to-use tool for initial survey analyses  
362 prior to using more sophisticated systems for higher resolution studies. To  
363 enable better detectability and spatiotemporal resolution, we will need to further  
364 improve the optical system and image sensor. In addition, to compensate for the  
365 lack of depth information available with HLC imaging, transgenic lines  
366 expressing a fluorescent  $Ca^{2+}$  indicator could be used to image specific cortical  
367 layers or cell types.

368 Various applications for imaging in the present study revealed the  
369 visualization of orientation selectivity encoded in individual excitatory neurons  
370 within the whole visual cortex of one hemisphere, and also revealed specific cell  
371 assemblies representing activation of the entire bilateral motor cortex during  
372 volitional behavior output. The firm attachment of the HLC imaging system to the  
373 head of a freely moving mouse enables the stable visualization of the neuronal  
374 activities in the same field of view at high reproducibility over many days, and the  
375 lightweight property of entire imaging system allows the mouse to move freely  
376 with relatively a small amount of stress, also permits the simultaneous use of  
377 multiple HLCs (Supplementary Fig. 2, Supplementary Movie 10).

378 Various volumetric imaging technologies have been developed recently. For  
379 example, in multi-photon microscope technology capable of deep observation, a  
380 2P-RAM (2-photon random access mesoscope)<sup>22</sup> provides a wide field of view

381 with high spatial resolution. However, it is impossible to eliminate the time lag for  
382 scanning multiple areas in the large field. A wearable endoscope equipped with  
383 a light-field optics<sup>23</sup> provides 3D imaging with no time lag but with sacrifice of  
384 spatial resolution, but it requires a large amount of calculation for the  
385 reconstruction of 3D image. On the other hand, a method of 3D imaging by  
386 combining a light-field or HiLo (highly inclined and laminated optical sheet)  
387 microscopy with a stage system that keeps up with fast motion of an animal was  
388 developed<sup>24,25</sup>. Under the necessity to carry out high-speed tracking at high  
389 precision in a fixed direction and the limitation in the size of observation field of  
390 view and depth, these system have been applied for the whole-brain Ca<sup>2+</sup>  
391 imaging of the freely moving animals with relatively small bodies such as  
392 zebrafish larvae. Some of the above methods require expensive and large-scale  
393 equipment.

394 In contrast, among the currently available various wearable optical imaging  
395 tools, the HLC is positioned as a unique wide-field, volumetric, and low-invasive  
396 imaging device for fluorescence imaging. The HLC in this paper provides a wide  
397 field of view and improved detection capability of deep signals. There is no time  
398 lag in imaging by the image sensor unlike the galvano scanning system. The  
399 laser of the excitation light source provides higher S/N with higher light density  
400 than the LED. The spacer apparatus with cranial window can be easily attached  
401 to the head with simple surgical operation and enables longitudinal observation  
402 over multiple days. Simple mechanisms of the HLC are suitable for commercial  
403 production.

404 Fluorescence change was maintained to be observable as long as 57 days  
405 after operation ([Supplementary Fig. 7e, f](#)). Judging from the observation by  
406 stereo microscopy in [Supplementary Fig. 1b](#), meanwhile, the clarity of the cranial  
407 window was kept unchanged for 100 days in the same individual. Therefore, we  
408 assume that longitudinal Ca<sup>2+</sup> imaging is possible for at least 3 months. Because  
409 we stopped imaging and monitoring within 3 months, it might still be possible to  
410 continue observation beyond this period.

411 Although only a few animal experiments were conducted to showcase the  
412 utility of the microscope in this paper, in the near future, longitudinal imaging  
413 using the wearable HLC tracking the same neurons at the same site under  
414 free-movement conditions will help to reveal neuronal activity that is specific to  
415 various behavioral tasks. Additionally, the simultaneous use of multiple HLCs will  
416 facilitate investigation of cognition and behavior through neuronal activity

417 imaging of the global sensorimotor system in animals, especially by a  
418 combination of electrophysiology and optogenetical applications.

419

420

421

## 422 **Acknowledgements**

423

424 We thank Charles Yokoyama for helpful comments and for editing the  
425 manuscript. The CaMK2a-tTA mouse line was a kind gift of Masako Kawano,  
426 Ayaka Bota, and Shigeyoshi Itoharu (RIKEN, CBS), and the G-CaMP6/pCAG  
427 plasmid was a kind gift of Hisato Maruoka and Toshihiko Hosoya (RIKEN, CBS).  
428 Animal care was supported by Yoshie Ito, Megumi Kobayashi, and Kawori  
429 Eizumi (RIKEN, CBS). Technical support for the HLC was provided by Hiroyuki  
430 Iino (DCT Co., Japan) and Kazushige Ooi (ImageTech Co., Japan), while the  
431 2-photon imaging was supported by Kaori Higuchi of the RIKEN-Olympus  
432 Collaboration Center (BOCC). The present study was supported by an internal  
433 research budget of RIKEN CBS to H.O. and by the Japan Society for the  
434 Promotion of Science (JSPS), KAKENHI grant numbers JP15K21627 and  
435 JP17K01996 to T.K.

436 Construction of the transgenic mouse line was supported by the program for  
437 Brain Mapping by Integrated Neurotechnologies for Disease Studies  
438 (Brain/MINDS) of the Ministry of Education, Culture, Sports, Science and  
439 Technology (MEXT) and the Japan Agency for Medical Research and  
440 Development (AMED), and by KAKENHI Grants 15H05723 and 16H06536 from  
441 MEXT and the Japan Society for the Promotion of Science (JSPS) to J.N., and  
442 by RIKEN through a Grant-in-Aid for Scientific Research for Innovative Areas,  
443 namely "Foundation of Synapse and Neurocircuit Pathology" and "Principles of  
444 Memory Dynamism Elucidated from a Diversity of Learning Systems" and for  
445 Challenging Exploratory Research, and from MEXT, the Human Frontier Science  
446 Program, Fujitsu, and Dwango to Y.H., Y.H. is also partly supported by Takeda  
447 Pharmaceutical Co. Ltd..

448

449

450

451

## 452 **References**

453

- 454 1. Schulz, D. et al. Simultaneous assessment of rodent behavior and  
455 neurochemistry using a miniature positron emission tomograph. *Nat*  
456 *Methods* **8**, 347-352 (2011).
- 457 2. Tang, J. et al. Noninvasive high-speed photoacoustic tomography of  
458 cerebral hemodynamics in awake-moving rats. *J Cereb Blood Flow Metab*  
459 **35**, 1224-1232 (2015).
- 460 3. Miao, P., Lu, H., Liu, Q., Li, Y., Tong, S. Laser speckle contrast imaging of  
461 cerebral blood flow in freely moving animals. *J Biomed Opt* **16**, 090502  
462 (2011).
- 463 4. Urban, A. et al. Real-time imaging of brain activity in freely moving rats  
464 using functional ultrasound. *Nat Methods* **12**, 873-878 (2015).
- 465 5. Helmchen, F., Fee, M.S., Tank, D.W. & Denk, W. A miniature head-mounted  
466 two-photon microscope: high-resolution brain imaging in freely moving  
467 animals. *Neuron* **31**, 903-912 (2001).
- 468 6. Zong, W. et al. Fast high-resolution miniature two-photon microscopy for  
469 brain imaging in freely behaving mice. *Nat Methods* **14**, 713-722 (2017).
- 470 7. Ghosh, K.K. et al. Miniaturized integration of a fluorescence microscope.  
471 *Nat Methods* **8**, 871-882 (2011).
- 472 8. Hayashi, Y., Tagawa, Y., Yawata, S., Nakanishi, S & Funabiki, K.  
473 Spatio-temporal control of neural activity in vivo using fluorescence  
474 microendoscopy. *Eur J Neurosci* **36**, 2722-2732 (2012).
- 475 9. Kobayashi, T. et al. Optical communication with brain cells by means of an  
476 implanted duplex micro-device with optogenetics and Ca<sup>2+</sup> fluoroimaging.  
477 *Sci Rep* **6**, 21247 (2016).
- 478 10. Nakai, J., Ohkura, M. & Imoto, K. A high signal-to-noise Ca<sup>2+</sup> probe  
479 composed of a single green fluorescent protein. *Nat Biotechnol* **19**, 137-141  
480 (2001).
- 481 11. Zhao, Y. et al. An expanded palette of genetically encoded Ca<sup>2+</sup> indicators.  
482 *Science* **333**, 1888-1891 (2011).
- 483 12. Ohkura, M. et al. Genetically encoded green fluorescent Ca<sup>2+</sup> indicators with  
484 improved detectability for neuronal Ca<sup>2+</sup> signals. *PLoS One* **7**, e51286  
485 (2012).
- 486 13. Chen, T.W. et al. Ultrasensitive fluorescent proteins for imaging neuronal  
487 activity. *Nature* **499**, 295-300 (2013).

- 488 14. Maruyama, R. et al. Detecting cells using non-negative matrix factorization  
489 on calcium imaging data. *Neural Networks* **55**, 11-19 (2014).
- 490 15. Hubel, D.H. & Wiesel, T.N. Receptive fields of single neurones in the cat's  
491 striate cortex. *J Physiol* **148**, 574-591 (1959).
- 492 16. Ohki, K., Chung, S., Ch'ng, Y.H. Kara, P. & Reid, R. Functional imaging with  
493 cellular resolution reveals precise micro-architecture in visual cortex. *Nature*  
494 **433**, 597-603 (2005).
- 495 17. Kondo, S. & Ohki, K. Laminar differences in the orientation selectivity of  
496 geniculate afferents in mouse primary visual cortex. *Nat Neurosci* **19**,  
497 316-319 (2016).
- 498 18. Kornhuber, H.H. & Deecke, L. Changes in the brain potential in voluntary  
499 movements and passive movements in man: readiness potential and  
500 reafferent potentials. *Pflugers Arch Gesamte Physiol Menschen Tiere* **284**,  
501 1-17 (1965).
- 502 19. Libet, B., Gleason, C.A., Wright, E.W. & Pearl, D.K. Time of conscious  
503 intention to act in relation to onset of cerebral activity (readiness-potential).  
504 The unconscious initiation of a freely voluntary act. *Brain* **106**, 623-642  
505 (1983).
- 506 20. Libet, B. Unconscious cerebral initiative and the role of conscious will in  
507 voluntary action. *Behav Brain Sci* **8**, 529-566 (1985).
- 508 21. Zingg, B. et al. Neural networks of the mouse neocortex. *Cell* **156**,  
509 1096-1111 (2014).
- 510 22. Sofroniew, N.J., Flickinger, D., King, J., & Svoboda, K. A large field of view  
511 two-photon mesoscope with subcellular resolution for in vivo imaging. *Elife*  
512 **5**, e14472 (2016).
- 513 23. Skocek, O. et al. High-speed volumetric imaging of neuronal activity in freely  
514 moving rodents. *Nat Methods* **15**, 429-432 (2018).
- 515 24. Cong, L. et al. Rapid whole brain imaging of neural activity in freely behaving  
516 larval zebrafish (*Danio rerio*). *Elife* **6**, e28158 (2017).
- 517 25. Kim, D.H. et al. Pan-neuronal calcium imaging with cellular resolution in  
518 freely swimming zebrafish. *Nat Methods* **14**, 1107-1114 (2017).
- 519 26. Coltman, J.W. The specification of imaging properties by response to a sine  
520 wave input. *J Opt Soc Am* **44**, 468-471 (1954).
- 521 27. Mizuno, S. & Takada, T. Examination of Coltman's formula and rectangular  
522 wave's response compared with sine wave's response. *Jpn J Radiol*  
523 *Technol* **36**, 316-321 (1980).

- 524 28. Kobayashi, T., Yasuda, K. & Araki, M. Coordinated regulation of dorsal bone  
525 morphogenetic protein 4 and ventral Sonic hedgehog signaling specifies the  
526 dorso-ventral polarity in the optic vesicle and governs ocular  
527 morphogenesis through fibroblast growth factor 8 upregulation. *Dev Growth*  
528 *Differ* **52**, 351-363 (2010).
- 529 29. Tilly, B.C. et al. Histamine-H1-receptor-mediated phosphoinositide  
530 hydrolysis, Ca<sup>2+</sup> signalling and membrane-potential oscillations in human  
531 HeLa carcinoma cells. *Biochem J* **266**, 235-243 (1990).
- 532 30. Mayford, M. et al. Control of memory formation through regulated  
533 expression of a CaMKII transgene. *Science* **274**, 1678-1683 (1996).
- 534 31. Sato, M. et al. Generation and imaging of transgenic mice that express  
535 G-CaMP7 under a tetracycline response element. *PLoS One* **10**, e0125354  
536 (2015).
- 537 32. Manita, S. et al. A top-down cortical circuit for accurate sensory perception.  
538 *Neuron* **86**, 1304-1317 (2015).
- 539 33. Sato, M. et al. Fast varifocal two-photon microendoscope for imaging  
540 neuronal activity in the deep brain. *Biomed Opt Express* **8**, 4049-4060  
541 (2017).
- 542 34. Butler, M.P. & Silver, R. Divergent photic thresholds in the  
543 non-image-forming visual system: entrainment, masking and pupillary light  
544 reflex. *Proc Biol Sci* **278**, 745-750 (2010).
- 545 35. Mohan, K. et al. Characterization of structure and function of the mouse  
546 retina using pattern electroretinography, pupil light reflex, and optical  
547 coherence tomography. *Vet Ophthalmol* **15**, 94-104 (2012).
- 548 36. Paxinos, G. & Watson, C. THE RAT BRAIN IN STEREOTACTIC  
549 COORDINATES. Academic Press: San Diego (1998).
- 550 37. Kobayashi, T. et al. Functional brain fluorescence plurimetry in rat by  
551 implantable concatenated CMOS imaging system. Functional brain  
552 fluorescence plurimetry in rat by implantable concatenated CMOS imaging  
553 system. *Biosens Bioelectron* **53**, 31-36 (2014).
- 554 38. Prusky, G.T., West, P.W. & Douglas, R.M. Behavioral assessment of visual  
555 acuity in mice and rats. *Vision Res* **40**, 2201-2209 (2000).
- 556 39. Dougherty, R. Extensions of DAMAS and benefits and limitations of  
557 deconvolution in beamforming. *11th AIAA/CEAS Aeroacoustics Conference*,  
558 AIAA 2005-2961 (2005).
- 559 40. Tribromoethanol (Avertin). *Cold Spring Harbor Protocols* **2006**, pdb.rec701



- 560 (2006).
- 561 41. Kawai, S., Takagi, Y., Kaneko, S. & Kurosawa T. Effect of three types of  
562 mixed anesthetic agents alternate to ketamine in mice. *Exp Anim* **60**,  
563 481-487 (2011).
- 564 42. Shibuki, K. et al. Dynamic imaging of somatosensory cortical activity in the  
565 rat visualized by flavoprotein autofluorescence. *J Physiol* **549**, 919-927  
566 (2003).
- 567 43. Zagha, E., Ge, X. & McCormick, D.A. Competing neural ensembles in motor  
568 cortex gate goal-directed motor output. *Neuron* **88**, 565-577 (2015).
- 569 44. Komiyama, T. et al. Learning-related fine-scale specificity imaged in motor  
570 cortex circuits of behaving mice. *Nature* **464**, 1182-1186 (2010).
- 571 45. Hira, R. et al. Spatiotemporal dynamics of functional clusters of neurons in  
572 the mouse motor cortex during a voluntary movement. *J Neurosci* **33**,  
573 1377-1390 (2013).
- 574 46. Li, N., Chen, T.W., Guo, Z.V., Gerfen, C.R. & Svoboda, K. A motor cortex  
575 circuit for motor planning and movement. *Nature* **519**, 51-56 (2015).
- 576 47. Donchin, O. et al. Single-unit activity related to bimanual arm movements in  
577 the primary and supplementary motor cortices. *J Neurophysiol* **88**,  
578 3498-3517 (2002).
- 579 48. Cisek, P., Crammond, D.J. & Kalaska, J.F. Neural activity in primary motor  
580 and dorsal premotor cortex in reaching tasks with the contralateral versus  
581 ipsilateral arm. *J Neurophysiol* **89**, 922-942 (2003).
- 582 49. Verstynen, T., Diedrichsen, J., Albert, N., Aparichio, P. & Ivry, R.B. Ipsilateral  
583 motor cortex activity during unimanual hand movements relates to task  
584 complexity. *J Neurophysiol* **93**, 1209-1222 (2005).
- 585 50. Derosiere, G. et al. Similar scaling of contralateral and ipsilateral cortical  
586 responses during graded unimanual force generation. *Neuroimage* **85**,  
587 471-477 (2014).
- 588 51. Schultze-Kraft, M. et al. The point of no return in vetoing self-initiated  
589 movements. *Proc Natl Acad Sci U S A* **113**, 1080-1085 (2016).
- 590 52. Kurata, K. & Tanji, J. Premotor cortex neurons in macaques: activity before  
591 distal and proximal forelimb movements. *J Neurosci* **6**, 403-411 (1986).
- 592
- 593

594 **Figure legends**

595

596

597 **Figure 1** Wearable system for imaging the cerebral cortex in freely moving  
598 animals

599

600 **(a)** Schematic image of the head-mounted laser camera (HLC) is shown. Right  
601 photos show the HLCs for green (GFP) or red fluorescence (RFP) imaging.

602 **(b)** Schematic image of the HLC imaging system. The camera part is attached to  
603 the spacer part when imaging is performed, and the head cap is attached to the  
604 spacer part when the mouse is housing.

605 **(c)** The weight measurement of all the constituent parts of a typical HLC is  
606 shown in the left image. Freely moving mice equipped with a single or dual  
607 HLC's are shown in the right column images ([Supplementary Movie 1](#)).

608 **(d)** Fluorescence  $\text{Ca}^{2+}$  imaging of the occipital cortical area including the visual  
609 cortex on an awake CaMK2a-G-CaMP mouse using the HLC (see also  
610 [Supplementary Movie 2](#)). The left image is a representative single frame of the  
611 movie. The middle image is a magnified view of the inset in the left image. The  
612 right image is a representative frame of the subtracted imaging movie, which  
613 was made by subtracting the average of the FI of each pixel from the FI of the  
614 same pixel during the first 10 frames of the imaging movie. The HLC can  
615 visualize excitatory neuronal activity as blinking light spots, and also visualize  
616 the spatial distribution of fine capillaries with a wide field of view (4.25 x 5.66  
617 mm). The view area of the HLC is adjustable. Bar indicates 1 mm.

618

619

620 **Figure 2** Optical specifications and adjustments of the HLC

621

622 **(a, b)** A checkerboard-design chart was captured by the HLC using different  
623 fields of view. All results are shown in (b), using the representative images  
624 shown in order of size of view from (a). The red line in (b) indicates an  
625 approximate curve, expressed by  $Y = -1.62 \times 10^{-2}X^2 + 9.4X - 0.48$ , and the  
626 correlation coefficient is  $R^2 = 0.999$ .

627 **(c)** Apparatus used for measuring a line-spread function (LSF) of the HLC using  
628 a line chart. The red square indicates the view area of the HLC.

629 **(d)** The upper picture shows the image of the line chart taken by the HLC, and

630 the lower graph indicates the LSF (ordinate, light intensity; abscissa, vertical  
631 position of the image). The red line corresponds to the position of the red lines in  
632 (e, f).

633 **(e, f)** A square wave response function (SWRF) was calculated based on the  
634 LSF (e) (lp = line pair, for a detailed calculation process see [Methods section](#)). A  
635 modulation transfer function (MTF) was calculated based on the SWRF (f). The  
636 horizontal and vertical red lines were drawn to cross at the point where the  
637 SWRF = 0.03.

638 **(g)** Schematic image representing the light shape measurements. Several types  
639 of light-shaping diffusers (LSDs) were attached in front of the white LED or LD at  
640 a distance of 1 mm.

641 **(h)** The distributions of illumination by an LD, whose original beam divergence  
642 was 3.3 x 14 deg at 40 mA, are shown as an 8-bit pseudo-colored image. The  
643 distributions of illumination by a white LED are shown as controls. Numbers at  
644 the top of the images show the LSD characteristics. Images are arranged  
645 according to the order of deviation of the LSD from the circle to the horizontal  
646 ellipse. Red squares indicate the typical view area of the HLC (4.0 x 5.3 mm).

647

648

649 **Figure 3** The HLC can acquire the fluorescence signal of the beads implanted  
650 into the deep layers of the cerebral cortex

651

652 **(a)** Fluorescent beads were implanted into the mouse cortex after a craniotomy.  
653 The blue circle and red square indicate the spacer position and the imaging area  
654 of the HLC, respectively.

655 **(b, c)** Fluorescence images taken by a fluorescence stereo microscope (b) and  
656 the HLC (c). Red arrows indicate the positions of implanted 15- $\mu$ m beads, and  
657 the numbers indicate the depth of implantation. Bar indicates 1 mm.

658 **(d)** In the two left images, the size and position of (b) and (c) were aligned based  
659 on the pattern of blood vessels and the central position of the beads implanted at  
660 a depth of 100  $\mu$ m (red lines). White arrowheads indicate the bead positions.  
661 The right two rows of 10 images show the magnified images of each bead taken  
662 by the stereo microscope (Mic., left column) or the HLC (right column). The  
663 vertical (v) and horizontal (h) rectangles were drawn to cross at the center of  
664 each bead.

665 **(e)** Fluorescence intensity (FI) distribution along the (v) and (h) in (d) were

666 measured, and the relative FIs against averaged FI at the center of the bead at a  
667 100- $\mu\text{m}$  depth are shown.

668 **(f)** A summary of (e) is shown. The image size of the fluorescent beads was  
669 calculated according to the number of pixels in the image. By comparing the FI  
670 at the centers and perimeters of each light spot, the number of pixels of  $> 50\%$  FI  
671 and  $> 90\%$  FI were counted. In the graph, error bars indicate the standard  
672 deviation. Note that the values  $> 90\%$  of the HLC stay almost invariant  
673 regardless of depth (red line).

674

675

676 **Figure 4** The HLC visualized intracellular  $\text{Ca}^{2+}$  dynamics of individual cells in a  
677 3D culture, and evoked neuronal activity in the deep layers of cerebral cortex

678

679 **(a)** Schematic image of the *in vitro* experiment. The sheet of 3D cultured Hela  
680 cells transfected with the G-CaMP6 gene was placed into a glass bottom dish,  
681 and  $\text{Ca}^{2+}$  imaging was performed with the HLC. Brightfield and fluorescence  
682 images were taken by a stereomicroscope or the HLC. The transfected cells  
683 emitted green fluorescence and were distributed sparsely across various depths.  
684 Bar indicates 1 mm.

685 **(b)** The graph shows the changes in FI of a single cell. The FI increased after  
686 histamine administration (+His), and then decreased when a solution of EGTA  
687 was applied. The black line indicates the mean FI for each of 5 frames.

688 **(c)** Schematic diagram for the *in vivo* experiment. An electrode was inserted into  
689 the cortex of a Thy1-G-CaMP7 mouse from the side after craniotomy. Then, the  
690 HLC was applied to the cortex and  $\text{Ca}^{2+}$  imaging was performed.

691 **(d)** Pseudo-color images are shown for the change in FI before and after  
692 electrical tetanic stimulation that was applied by an inserted electrode (see  
693 [Supplementary Fig. 6c](#) for more detail). Bar indicates 1 mm.

694

695

696 **Figure 5** Zoom-up  $\text{Ca}^{2+}$  Imaging by using the HLC with short spacer in the freely  
697 moving mice

698

699 The field-of-view size by the HLC can be changed for zooming up by twisting  
700 the lens barrel. For small field of view with short working distance after zooming  
701 up, it is preferable to use short spacer apparatus.

702 **(a)** Schematic images of different type of spacer are shown. The spacer part can  
703 be manufactured arbitrarily by changing its design.

704 **(b)** After imaging, the field-of-view size was confirmed by capturing the image of  
705 the reference chart.

706 **(c)** The images of the reference chart captured by the HLC with long or short  
707 spacer are shown.

708 **(d)**  $\text{Ca}^{2+}$  imaging was performed at the visual cortex of the CaMK2a-G-CaMP7  
709 mouse by the HLC with the short spacer under the freely moving condition. The  
710 maximized fluorescence image of 20 fps movie for 5 min is shown at the left  
711 panel, and its magnified, maximized fluorescence image of the inset part of the  
712 left panel for 20 sec is shown on the right panel. Magenta arrowheads and  
713 numbers indicate the ROIs of which the light spots were randomly selected. The  
714 averaged and maximized movie in each 5 frames is shown in [Supplementary](#)  
715 [Movie 7](#).

716 **(e)** The change rates of the fluorescence intensity ( $\Delta F/F$ ) at each ROIs of (d) are  
717 shown.

718

719

720 **Figure 6** Separation and identification of superimposed signals of individual cells  
721 by NMF in the HLC image

722

723 **(a)**  $\text{Ca}^{2+}$  imaging of the CaMK2a-G-CaMP7 mouse at the visual cortex was  
724 performed under the freely moving condition. The Maximized fluorescence  
725 image at 20 fps for 20 sec at the same view point as in [Fig. 5d](#) is shown.

726 **(b)** shows the subtracted maximized image of the movie.

727 **(c)** Using the raw 20 fps imaging data for 20 sec (total 400 frames), it was  
728 possible to segment the image into individual ROIs (region of interest)  
729 representing cell bodies by using a NMF algorithm ([Methods section](#)). The result  
730 is shown in (c), which shows the boundaries of 685 detected cells, plotted with  
731 different colors. It can be noted that many cells with spatial overlap were  
732 detected.

733 **(d)** shows the signal extracted by NMF for each cell over time, showing  
734 spontaneous activities of cells during free moving. With the application of the  
735 NMF algorithm, baseline removal and separation of temporal signals corrupted  
736 by spatial overlap of cells was achieved.

737 **(e)** shows the centroid locations of the cell bodies in X-Z plane, where X is the

738 longer image axis of (a) and Z is the depth of cortex corresponding to baseline  
739 value of the cell signal. Blue Roman numerals at the Z axis indicate the  
740 estimated cortical layer, assuming that deepest signal came from a depth of 1  
741 mm. The broken blue line indicates the imaginary inclined cortical surface.

742 **(f)** The left image shows the centroid locations of the cells in three-dimension,  
743 where X and Z axis are same as (e), while Y-axis corresponds to the shorter  
744 image axis of (a). A three dimensional distribution of the cell bodies shows the  
745 presence of cells with various depths. The right image shows the same three  
746 dimensional distributions of the cell bodies with cell boundaries showed instead  
747 of centroid.

748

749

750 **Figure 7** Observation of the physiological responses of individual neurons by  
751 large-scale imaging including the whole visual area of the cortex

752

753 **(a)** The left picture shows the experimental setup. The middle schematic  
754 diagram shows the HLC imaging area (red square, 4.25 x 5.66 mm) with the  
755 map of the brain area reconstructed from serial sections of the brain atlas  
756 ([Supplementary Fig. 8a](#)). Abbreviations: V1/2, primary/secondary visual cortex;  
757 PPC (PtA), posterior parietal cortex (parietal association cortex); S1 (Tr/BF)/S2,  
758 primary (trunk/olfactory barrel field)/secondary somatosensory cortex; M1/2,  
759 primary/secondary motor cortex. The right image is the deconvoluted  
760 fluorescence image of the occipital cortex in the awake CaMK2a-G-CaMP7  
761 mouse taken by the HLC (see [Methods section](#) for detail). The lower four images  
762 are fluorescence images of the occipital cortex. Magenta and white arrowheads  
763 indicate the region of interests (ROIs) or negative control ROIs, and their  $\Delta F/F$   
764 are presented in (b), (c).

765 **(b, c)** The left and right graph shows the raw or averaged  $\Delta F/F$  after a single (b)  
766 and 10x repeated flashlight stimulus (c), respectively, was applied by the LED.  
767 Gray vertical lines and red dots in each graph indicate the stimulation points.  
768 The red bold line data in the right graph of (b) and (c) indicate the means of 3  
769 and 5 frames, respectively. Black lines mean negative control ROIs.

770 **(d)** Drifting gratings in 8 different directions were presented. The upper and  
771 lower graphs show the raw or averaged  $\Delta F/F$ . Examples of the specific  $\Delta F/F$   
772 increases according to the opposite degree stimulation (asterisks) are shown.  
773 Data indicated by the black line indicate the ROI of the negative control, and the

774 gray shaded time windows in each graph indicate the stimulation periods. The  
775 red bold line data in the lower graphs indicate the means of 5 frames.

776 **(e)** Fluorescence image shows the ROIs of the #2 mouse. White arrowheads  
777 indicate negative control ROIs, and green and magenta arrowheads show ROIs  
778 for left graph or right graph in (d).

779 **(f)** shows the distribution of the ROIs of different orientation specificity by  
780 different pseudo-colors in the same area as (e). See Methods for details.

781 **(g)** shows the selected ROIs with high level of orientation specific responses (top  
782 3.5 %) among the ROIs in the same area as (e). See Methods for details. These  
783 ROIs are mostly contained in the visual area of the cortex. Abbreviations: V1m/b,  
784 primary visual cortex monocular/binocular zone; A, anterior; AM, anteromedial;  
785 PM, posteromedial; RL, rostralateral; AL, anterolateral; LM, lateromedial; LI,  
786 laterointermediate; POR, postrhinal; P, posterior area.

787

788

789 **Figure 8** Imaging of the entire motor cortex reveals premotor activity

790

791 **(a)** The whole view of the restricted-motion experiment apparatus for mice.

792 **(b)** Hindleg movements (kicks) of the mouse were captured by web cameras  
793 from both lateral sides of the apparatus.

794 **(c)** Schematic diagram showing classification of the periods during the  
795 experiment. The movement state was subdivided into 3-sec durations  
796 representing “Before” and “After” the initiation of motion. “Interphase” indicates  
797 the 6-sec static state.

798 **(d)** Schematic image showing the HLC imaging position (red square). The  $\text{Ca}^{2+}$   
799 imaging was performed in awake CaMK2a-G-CaMP7 mice.

800 **(e)** The upper or lower row images show the results of the  $\text{Ca}^{2+}$  imaging with left  
801 or right hindleg kicking, respectively. The left column images represent the  
802 fluorescence images in which all raw-imaging data frames in 11 or 10-time left or  
803 right kicks during the 6-sec motion state were merged into one frame by  
804 maximization. Similarly, imaging data of the “interphase” state in 3-time left or  
805 right kicks were merged, and the results are shown in the middle column by blue  
806 pseudo-coloring. Also, “before” and “after” states are shown in green and red,  
807 respectively. The right column images show the subtracted results, in which  
808 green and red represent the [“before” – “interphase”] and [“after” – “interphase”]  
809 of the middle column images, respectively. To make visual understanding easier,

810 the light spots of the subtracted images were enlarged and made brighter.

811 **(f)** The subtracted results of (e) for the spots with  $\Delta F/F > 5\%$  were plotted  
812 spatiotemporally for each left or right kick ([Supplementary Fig. 9c](#)). The  
813 brightness of each pseudo-colored dot represents an averaged frequency of  
814 appearance of the peak in each trial.

815 **(g)** A schematic diagram summarizing the results in [Fig. 8](#) and [Supplementary](#)  
816 [Fig. 9](#) for the left hindleg movement. The width and height of the half columns in  
817 each hemisphere represent the number and the averaged activity of the “before-”  
818 and “after-group” defined in [Supplementary Fig. 9d-g](#). The before-group neurons,  
819 which have a peak excitation frequency before the initiation of movement,  
820 continue to show lateralized distribution and activity both before and after the  
821 motion, while the after-group neurons show less lateralization.

822

823



## 824 **Methods**

825

### 826 Development and construction of a wearable imaging system

827

828 The wearable HLC imaging system is composed of two major parts, the  
829 camera and the spacer (Fig. 1a). The two parts can be separated or combined  
830 by using the O-ring as a fastener hooked on their side protrusions. The  
831 cylindrical spacer body has a cranial imaging window (object plate) at its base  
832 that makes direct contact with the surface of the cortex. The spacer is attached  
833 to the mouse head, and the camera is combined with the spacer when imaging  
834 is performed. The detachable wearable camera helps with the long-term housing  
835 of experimental mice by keeping them free from movement restriction by an  
836 electrical wire (Supplementary Movie 1). The camera module (DCT, Co., Japan)  
837 has a CMOS (complementary metal-oxide semiconductor) image sensor chip  
838 (1/13", 480 x 640 pixels, pixel size = 1.75 x 1.75  $\mu\text{m}$ ; OmniVision Technologies  
839 Inc., USA) and a deep-focus optical system. The imaging area is adjustable, and  
840 the bottom diameter of the typical cylindrical spacer body is  $7.5 \pm 0.5$  mm.  
841 Although the design of spacer body is changeable, typically the height of the  
842 spacer body is  $9.0 \pm 0.5$  mm (long spacer in Fig. 5), in this case, the volume of  
843 spacer part is approximately  $500 \text{ mm}^3$ . The thickness of head cap and gasket is  
844  $1.0 \text{ mm} \pm 0.5 \text{ mm}$  each, therefore, the total volume of the HLC is approximately  
845  $600 \text{ mm}^3$ . The HLC is lightweight (typically 0.9 g) and does not disturb the  
846 natural behavior of a small mouse such as individuals from the C57BL/6 line  
847 (Supplementary Fig. 2d, e).

848 The HLC has an LD for the excitation light and an absorption filter for the  
849 emission light. The camera was constructed by firmly attaching the micro  
850 camera and LD to the head cap with epoxy resin. For green and red  
851 fluorescence imaging, the high pass absorption filter set at  $> 500$  or  $> 520$  and  $>$   
852  $560$  or  $> 580$  nm, respectively (Fujifilm, Co., Japan) was attached in front of the  
853 lens, and a blue or green LD (450-460, 488 or 530 nm; OSRAM, Co., Germany)  
854 was used, respectively. The LD along with the LSD (Optical Solutions, Co.,  
855 Japan) and the copper heat sink is driven by the LD driver (Supplementary Fig.  
856 4a, b). The glass object plate (0.525 mm thickness; Matsunami Glass Ind., Ltd.,  
857 Japan) was firmly attached to the bottom of the spacer body. The head cap and  
858 the spacer body were made based on 3D-CAD data by cutting an acrylic plate  
859 with a lathe machine.

860 The image data were transferred to a computer via a USB cable, displayed  
861 on a monitor, and saved as an AVI movie file using free software, AmCap  
862 (Microsoft, Co., USA). For Ca<sup>2+</sup> imaging, the image sensor was typically driven  
863 at < 30 fps to ensure sufficient sensitivity, stable data transfer and preservation,  
864 and real-time presentation on the monitor. The  $\Delta F/F$  of the mechanical noise  
865 when measuring inorganic matter was below the detection limit of 8-bit data.  
866 ImageJ (supplied by the National Institutes of Health, USA) was used for all  
867 image data analysis. Graphic art works were performed using the free software,  
868 DesignSpark Mechanical (3D CAD; computer-aided design, Radiospares  
869 Components, Inc.) and GIMP (GNU Image manipulation program, Free Software  
870 Foundation, Inc.).

871

872 Verifying the optical specifications of the HLC

873

874 The HLC has deep-focus optics and its working distance (WD) can vary by  
875 adjusting the lens barrel. The lens position change can also vary with the field of  
876 view size at the same time. When the lens barrel is twisted and pulled out for a  
877 short WD, the view field becomes small. In contrast, when the lens barrel is  
878 twisted and pressed for a long WD, the view field becomes large. If the position  
879 of the camera is adjusted properly such that the WD fits the object, the HLC can  
880 obtain either a narrow or wide field of view arbitrarily, as shown in [Fig. 2a, b](#). The  
881 minimum field of vision is 2.00 x 2.67 mm at 2.70 mm of WD, and here the  
882 maximum resolution was 8.33  $\mu\text{m}/\text{lp}$  (line pair), 4.17  $\mu\text{m}/\text{pixel}$ . The maximum  
883 field of vision is 10.0 x 13.3 mm at 15.0 mm of WD, and here the minimum  
884 resolution was 41.7  $\mu\text{m}/\text{lp}$ , 20.8  $\mu\text{m}/\text{pixel}$ .

885 There is a physical limit to the barrel adjustment range, and if adjusted to an  
886 extreme WD value, light aberration cannot be corrected and the peripheral  
887 portion of the image is distorted in a pincushion pattern. For instance, with 6.65 x  
888 8.87 mm imaging, the central part of the image can cover 6.65 mm vertically,  
889 whereas that of the periphery vertically covers 6.40 mm, which means DTV  
890 (television distortion) =  $(6.65 - 6.40)/6.40 \times 100 = 3.91$  [%]. Additionally, the  
891 central and peripheral parts of the image horizontally cover 8.86 and 8.67 mm,  
892 respectively. Therefore, the optical distortion is 2.78 %, calculated as follows:  
893 distortion [%] =  $[(\text{actual half diagonal distance}) - (\text{predicted half diagonal}$   
894  $\text{distance})]/(\text{predicted half diagonal distance}) \times 100 = \sqrt{[(6.65/2)^2 + (8.86/2)^2]} -$   
895  $\sqrt{[(6.40/2)^2 + (8.67/2)^2]}/\sqrt{[(6.40/2)^2 + (8.67/2)^2]} \times 100$ . The pincushion distortion will

896 be suitable for observing the convex cortex, but not the barrel distortion (see  
897 also right panel in [Supplementary Fig. 6b](#)).

898 Next, the depth of field (DOF) was calculated. DOF is defined by an  
899 associated resolution and contrast, and is estimated by a single value calculated  
900 from the diffraction limit as a theoretical approximation; however, it is difficult to  
901 make a genuine comparison because many imaging lenses are not diffraction  
902 limited. Therefore, the only way to truly determine DOF is to use a test target.  
903 Normally, even if a lens has infinite focus theoretically, the spatial resolution of  
904 the image sensor (density of the photo-diode pixel array) is limiting for DOF.  
905 Firstly, the line spread function (LSF) of the HLC in the case of 6.65 x 8.87 mm  
906 imaging (resolution; 27.7  $\mu\text{m}/\text{lp}$ , 13.9  $\mu\text{m}/\text{pixel}$ ) was analyzed by using a line  
907 chart ([Fig. 2c, d](#)), and then based on the results of the LSF, the square wave  
908 response function (SWRF) was calculated as follows:

$$C_{out}(u) = \frac{\frac{1}{2} (I_{max}(u) - I_{min}(u))}{\frac{1}{2} (I_{max}(u) + I_{min}(u))} = \frac{I_{max}(u) - I_{min}(u)}{I_{max}(u) + I_{min}(u)}$$

909

$$SWRF(u) = \frac{C_{out}(u)}{C(0)} = \frac{\left[ \frac{I_{max}(u) - I_{min}(u)}{I_{max}(u) + I_{min}(u)} \right]}{\left[ \frac{I_{max}(0) - I_{min}(0)}{I_{max}(0) + I_{min}(0)} \right]}$$

910

911  $C_{out}(u)$  is the output contrast of rectangular wave pattern at spatial frequency  $u$ .  
912  $I_{max}$  and  $I_{min}$  are the values obtained by converting the intensity into the dose at  
913 each square wave of the LSF. As a result, the SWRF is 24.7 [lp] at a cut-off point  
914 of 0.03, as generally used by many optical manufacturers ([Fig. 2e](#)). That SWRF  
915 value corresponds to the position at 600 pixels in LSF ([Fig. 2d](#)). In the line chart,  
916 the line pair width is 0.912 mm. Therefore, DOF is  $24.7 \times 0.912 \times \sqrt{3}/2 = 19.5$   
917 [mm].

918 Finally, to calculate an effective spatial frequency at the distorted edge of  
919 the imaging field, the SWRF (a rectangular wave response function) was  
920 corrected to the modulation transfer function (MTF; sine wave response  
921 function), calculated with the correction via Coltman's formula<sup>26</sup>. MTF is a  
922 measure of an imaging lens's ability to transfer contrast from the object plane to  
923 the image plane at a specific resolution, and is expressed with respect to image  
924 resolution (lp/mm) and contrast (%). Typically, as resolution increases, contrast

925 decreases until a cut-off point, at which the image becomes irresolvable and grey.  
926 The formula is shown below.

$$\text{MTF}(u) = \frac{\pi}{4} \sum_{k=1}^{\infty} B_k \frac{\text{SWRF}\{(2k-1)u\}}{(2k-1)}$$

927

$$\text{Resolution} = \frac{1}{\text{lp/mm}} \times 1000$$

928

929 If the total number of prime numbers in  $(2k - 1)$  is  $m$  and the number of types of  
930 prime numbers is  $n$ ,  $B_k = 0$  when  $m > n$ , and  $B_k = (-1)^n (-1)^{k-1}$  when  $m = n$ . For  
931 the calculation of MTF, up to the fourth term of the expansion formula was used  
932 according to a previous verification<sup>27</sup>. As a result, MTF resulted in an effective  
933 spatial frequency of 15.5 lp/mm where  $\text{MTF} = 0.03$  (Fig. 2f), producing an  
934 effective spatial resolution of 64.5  $\mu\text{m}/\text{lp}$ . Therefore, the estimated minimum  
935 effective spatial resolution was 64.5  $\mu\text{m}/\text{lp}$  at the distorted edge of the imaging  
936 field, which is 2.3 times that of 27.7  $\mu\text{m}/\text{lp}$  at the center of the visual field in the  
937 case of 6.65 x 8.87 mm imaging (resolution; 27.7  $\mu\text{m}/\text{lp}$ , 13.9  $\mu\text{m}/\text{pixel}$ ).  
938 According to the above results, although actual measurement values will  
939 fluctuate depending on the measuring environment and optical distortion, a  
940 discriminable minimum light spot is presumed as approximately two times  
941 blurred at the edge of the field of view due to natural optical aberration.

942

943 Quantitative imaging analysis using fluorescent beads

944

945 After craniotomy, fluorescent beads (F21010, green fluorescent  
946 FluoSpheres, polystyrene; Thermo Fisher Scientific Inc., USA) were implanted  
947 into the cortex of the anesthetized mice at different depths by using a needle and  
948 micromanipulator (Fig. 3). The bead diameter of 15  $\mu\text{m}$  was similar to the  
949 general cell size. The stereomicroscope has a general objective focus lens,  
950 whereas the HLC has a deep-focus lens. In Fig. 3, the field of view of the HLC is  
951 3.80 x 5.06 mm, 1 pixel = 7.917  $\mu\text{m}$ . A general objective lens can handle a bright  
952 image because the F value is smaller than the deep-focus lens, and a sharper  
953 image was obtained by focus imaging in Fig. 3b than in Fig. 3c; however, the  
954 DOF was shallow. In contrast, with the HLC, the fluorescence derived from every  
955 bead can be detected even at an 800  $\mu\text{m}$  depth, suggesting that the detectability  
956 of fluorescence by the deep-focus lens is apparently higher than that for a

957 conventional focus lens. In the left 2 images of Fig. 3d, the position of the upper  
958 beads at 400  $\mu\text{m}$  depth does not match exactly between the conventional  
959 microscope and the HLC. This is likely due to differences in optical distortion.  
960 Regarding the small 10 images to the right column in Fig. 3d, although these  
961 images are shown brightly for the sake of convenience in aligning and  
962 distinguishing shapes, the measurement was actually performed based on the  
963 raw data, with the quantitative results shown as a graph in Fig. 3e, f. In the  
964 microscope image, the FI and shape of each bead at the same depth are almost  
965 the same (left graph in Fig. 3e), supporting the accuracy of the experimental  
966 system. Thus, the deeper the position of the beads, the lower the FI becomes in  
967 the image taken by the conventional stereomicroscope, until the FI is reduced  
968 almost to background levels at 800  $\mu\text{m}$ . In contrast, the decrease in FI with depth  
969 is mild for the HLC imaging, and a stronger fluorescent signal than for the  
970 conventional microscope was detected even at a depth of 800  $\mu\text{m}$ . Compared at  
971 the same depth, the bead's FI level and shape captured by the HLC are slightly  
972 variable. This can be reasonably explained by distribution differences in the  
973 excitation light (see also the image in Fig. 2h) and optical distortion (as  
974 mentioned above in Methods section for Fig. 2a). In fact, from the center of the  
975 field of view to the periphery, the intensity of the excitation light decreases and  
976 the size increases. It is possible to correct the above-mentioned variability  
977 mathematically, if necessary, in actual functional brain cellular imaging.  
978 Concerning the result of Fig. 3f, the deeper the position of the bead, the larger it  
979 becomes relative to its actual size in the conventional microscope images. In  
980 contrast, image sizes with the HLC are generally constant relative to depth.  
981 Specifically, the enlargement ratio at 50% FI with the stereomicroscope image  
982 against the actual bead size is 4.10 (at 100  $\mu\text{m}$ ), 14.6 (at 400  $\mu\text{m}$ ), and 17.6 (at  
983 800  $\mu\text{m}$ ), compared to 4.75 (at 100  $\mu\text{m}$ ), 5.80 (at 200  $\mu\text{m}$ ), and 6.86 (at 800  $\mu\text{m}$ )  
984 for the HLC imaging. Thus, both the decline in signal detection ability and the  
985 expansion of the outline seem to be less when using the HLC due to the  
986 deep-focus optics.

987

988  $\text{Ca}^{2+}$  imaging in 3D culture cells

989

990 Cell cultures in 2D and 3D, gene transfection, and drug administration were  
991 performed according to previous reports<sup>9,28</sup>. HeLa cells, derived from a human  
992 cervical cancer, were transfected with the G-CaMP6 gene<sup>12</sup> under 2D conditions.

993 After transfection, cells were embedded in the collagen gel as an extracellular  
994 matrix to imitate brain structure as a brain phantom. HeLa cells are activated by  
995 histamine through the histamine H<sub>1</sub>-receptor by producing intracellular Ca<sup>2+</sup>  
996 increases<sup>29</sup>. Thus, when a histamine solution (final 5 μM) was applied to the dish,  
997 rising Ca<sup>2+</sup> increases were detected by the HLC at 30 fps imaging  
998 (Supplementary Fig. 6a, Supplementary Movie 4). In contrast, the increase was  
999 abolished by 5 mM EGTA (Fig. 4b).

1000

1001 Animal studies

1002

1003 All procedures involving animals conformed to the animal care and  
1004 experimentation guidelines of the RIKEN Animal Experiments Committee and  
1005 Genetic Recombinant Experiment Safety Committee. C57BL/6J (SLC Co.,  
1006 Japan), CaMK2a-tTA (Jackson 3010)<sup>30</sup>, TRE-G-CaMP7-2A-DsRed2<sup>31</sup>, and  
1007 Thy1-G-CaMP7-2A-DsRed2 (Thy1-G-CaMP7)<sup>32,33</sup> mice, aged 6-12 months,  
1008 were used for the *in vivo* experiments (see details of surgical operation in  
1009 Supplementary Fig. 1).

1010

1011 Cell detection and signal extraction

1012

1013 In Fig. 6c, imaging data analysis was performed using custom codes in  
1014 LabVIEW (National Instruments) and Matlab (Mathworks). Brain imaging movies  
1015 were processed in the following steps to detect cell bodies and extract their  
1016 temporal signals. First, for each pixel of the image, a variance value was  
1017 calculated using the time signal of that pixel. Thus a variance map was obtained  
1018 for each movie. This variance map has peaks and valleys of various heights,  
1019 corresponding to the location cell bodies. This variance map was then cut  
1020 horizontally at different heights to obtain 100-200 slices, depending on the data.  
1021 Each of these slices showed presence of segmented ROIs. Cells with weaker  
1022 activation were visible in slices cut in higher depth from the top, while highly  
1023 activated cells were found in slices in lower depths. All ROIs with area in the  
1024 range of 30-150 square microns were gathered to form a preliminary set of  
1025 cell-like ROIs. For each ROI, a 2-pixel-wide Gaussian filter was used to smooth  
1026 the spatial distribution of the ROI. However, as in many cases same cells were  
1027 detected multiple times in varying depths, temporal correlations among these  
1028 ROIs were checked. ROIs having temporal correlation value >0.9 and some

1029 degree of spatial correlation were considered as same cells, and they were  
1030 added to form one single ROI. By performing this task recursively, we obtained a  
1031 second set of ROIs representing the cell bodies in the movie.

1032 In the next step, we calculated temporal signals of these ROIs from the  
1033 movie by taking weighted average of temporal signal of all the pixels in a specific  
1034 ROI. As the intensity of the movie pixels varied due to position of pixels, ROIs  
1035 has various levels of baseline intensity signals. Furthermore, in case of weakly  
1036 activated cell bodies, actual calcium transient signal was not clearly visible due  
1037 to temporally fluctuating baseline. Therefore, to eliminate baseline effect, we  
1038 used a NMF (Non-negative Matrix Factorization) algorithm<sup>14</sup> to extract actual  
1039 activation of the cells while separating the spatio-temporal baseline of the image  
1040 simultaneously by solving the following problem:

$$\text{Minimize : } \|(F - W \times H - S_b \times A_b)\|_2$$

$F$  : original image

$W$ : spatial components corresponding to cells

$H$ : temporal components corresponding to cells

$S_b$ : Spatial baseline

$A_b$ : Temporal baseline

1041 With the application of the above mentioned algorithm, baseline removal and  
1042 separation of temporal signals corrupted by spatial overlap of cells was  
1043 achieved.

1044

1045 Perceptual and behavioral tests

1046

1047 In Fig. 7, awake mice received either light stimulation or an 8-direction  
1048 drifting grating with blue light stimulation using a light emitting diode (LED, peak  
1049 wave length 470 nm; Stanley Electric Co., Ltd., Japan) driven by a function  
1050 generator, or video stimulation using a computer monitor. C57BL/6 mice have  
1051 high photosensitivity against blue light judging from their pupillary light reflex<sup>34,35</sup>.  
1052 Thus, to increase the stability of repeated visual inputs to the mouse, the head of  
1053 the mouse was fixed with a stereotactic instrument while its body was allowed to  
1054 move freely (upper left image in Fig. 7a), so that the left eye was given the visual  
1055 stimuli while the right eye was masked. All experiments were done in a dark  
1056 room, and the imaging was started after 15-minute habituation. In Fig. 7a, the  
1057 upper middle schematic diagram for the rodent brain was drawn with partial  
1058 modification by reconstructing the transverse sections of the brain atlas<sup>36,37</sup>

1059 (Supplementary Fig. 8a).

1060 A single flashlight stimulation (rectangular pulse 0.1 sec) or 10-times  
1061 repeated flashlight stimulation (rectangular pulse trains of 0.5 sec, 20 Hz,  
1062 duration 25 ms, interval 25 ms) were applied to the mouse. Similarly, the  
1063 8-direction drifting grating (each drifting duration 3 sec, interval 6 sec, > 0.5  
1064 cycle/degree<sup>38</sup>) was presented to the mouse. Ca<sup>2+</sup> imaging was then performed  
1065 using the HLC on the CaMK2a-tTA x TRE-G-CaMP7-2A-DsRed2 mice  
1066 (CaMK2a-G-CaMP7) over the right visual cortical area. ROIs of 4 pixels were  
1067 selected by visual judgment, and changes in FI were measured from the raw  
1068 imaging data. Fig. 7b represents the results of 12 ROIs of 2 mice in 6 trials, while  
1069 Fig. 7c shows the results of 7 ROIs of 2 mice in 3 trials. All ROI positions are  
1070 shown in the lower column images of Fig. 7a. In Fig. 7d, the left and right graphs  
1071 plot the raw values obtained from 15 ROIs of 2 mice in 3 trials and 12 ROIs of 2  
1072 mice in 1 trial, respectively. ROIs of one mouse (ID: #2) among 2 mice is  
1073 exemplified in Fig. 7e. In Fig. 7f, Data of 4 opposite angles ([0 and 180°], [45 and  
1074 225°], [90 and 270°], and [135 and 315°]) during the 3-second stimulation were  
1075 maximized, and data of right angles were subtracted as below,  $\Delta F$  [0 and 180°] =  
1076 FI ([0 and 180°] – [90 and 270°]),  $\Delta F$  [45 and 225°] = FI ([45 and 225°] – [135  
1077 and 315°]),  $\Delta F$  [90 and 270°] = FI ([90 and 270°] – [0 and 180°]),  $\Delta F$  [135 and  
1078 315°] = FI ([135 and 315°] – [45 and 225°]). Finally, these four different  $\Delta F$ 's  
1079 were assigned with different 4 colors (Green, Blue, Magenta, Yellow), and each  
1080 ROI was given a pseudo-color by weighed superimposition of these 4 colors to  
1081 represent the orientation preference of each ROI (Fig. 7f). Among these ROIs,  
1082 those with top 3.5 % of pseudo-color intensity are presented in Fig. 7g.

1083 Regarding deconvolution (upper right image in Fig. 7a), diffraction point  
1084 spread functions and iterative deconvolutions were calculated according to  
1085 Dougherty's algorithm<sup>39</sup>. In the present study, FI measurements were always  
1086 extracted from raw data, and not from the deconvoluted data.

1087 For the maximum points extraction (Supplementary Fig. 3), light points were  
1088 selected and counted from the image after subtraction of background with the  
1089 parameter of a noise tolerance of 10 according to the ImageJ algorithm  
1090 constructed by Michael Schmid (NIH, USA).

1091

1092 For the "restriction motion experiment" represented in Fig. 8, an apparatus  
1093 was made to analyze neuronal activity in the mice derived from specific  
1094 voluntary movement initiation. A cylindrical restraint tube was filled with urethane



1095 foam resin to fit the body shape of the mouse, and its external wall was painted  
1096 with black ink. Hence, the body of the mouse is held firmly when it is inserted in  
1097 the tube, and other parts of the body except the legs do not move as much, thus  
1098 mildly restricting the mouse motion and sensation. Before beginning the  
1099 measurements, the mouse was placed in the cylindrical restraint and their legs  
1100 protruding from the tube were attached to splints, which functioned as  
1101 body-worn foot levers. The splints could move according to the leg motions or  
1102 could be made immovable individually by the fixing of bolts. The motion of the  
1103 splint was followed by the movement of a line drawn outside the splint and  
1104 captured by a web camera at 30 fps from both lateral sides. Then, Ca<sup>2+</sup> imaging  
1105 was performed after 15-minute habituation in 4 mice (ID: #3-6) using an HLC  
1106 attached to the spacer protruding from the upper part of the restraint tube, at 20  
1107 fps (Fig. 8) or 10 fps (Supplementary Fig. 9a, Supplementary Movie 9).

1108 A series of analyses comprising a “comprehensive quantitative analysis”  
1109 (Fig. 8e, f, Supplementary Fig. 9b, c) and an “overall qualitative analysis”  
1110 (Supplementary Fig. 9d-g) were also conducted as described in the respective  
1111 figure legends. The maximization of FI in the imaging data, described as a  
1112 maximum intensity projection in Supplementary Fig. 7, removed the basal  
1113 random noise similarly to an averaging process, but without losing the  
1114 information of relatively rare but important events.

1115

#### 1116 **Data availability**

1117

1118 All relevant data are available from the authors.

1119

## Fig. 1

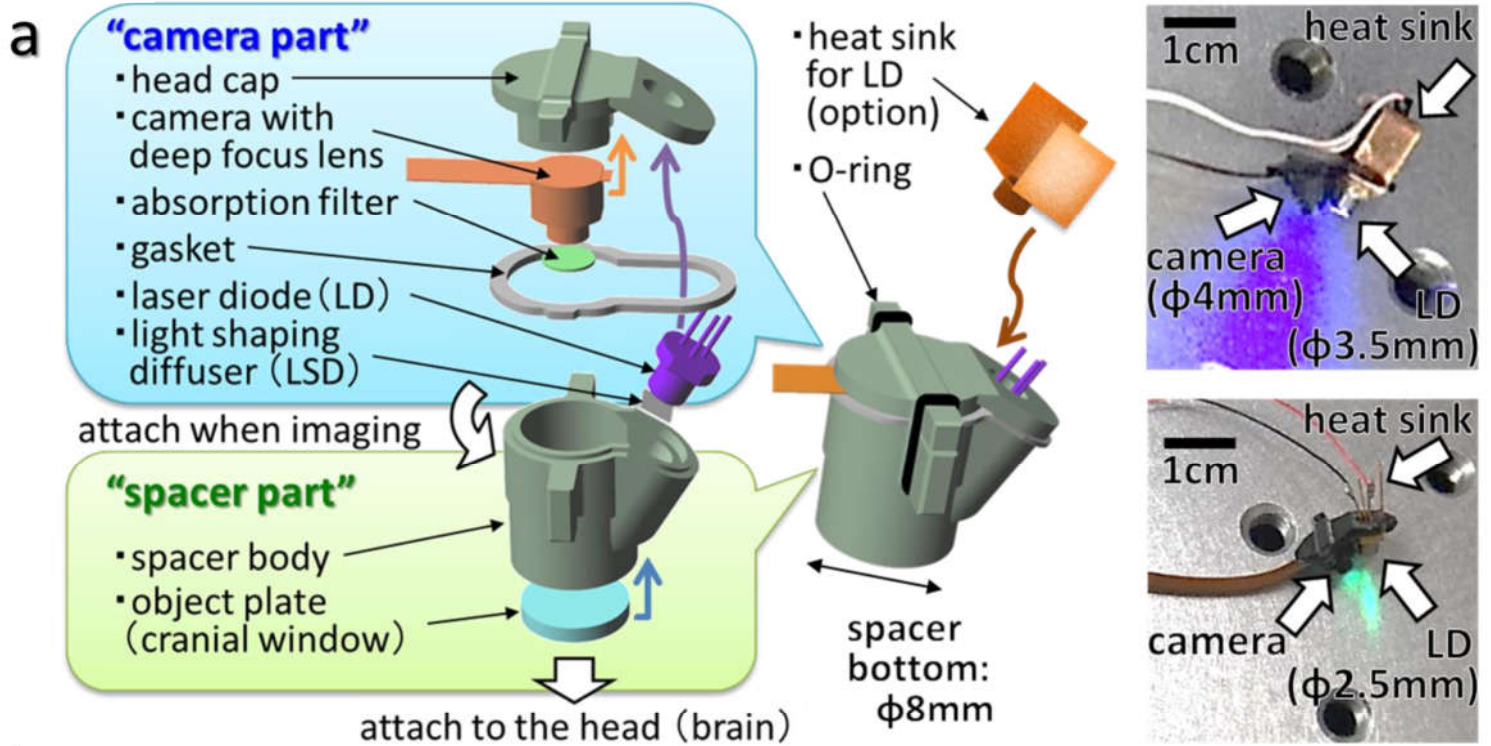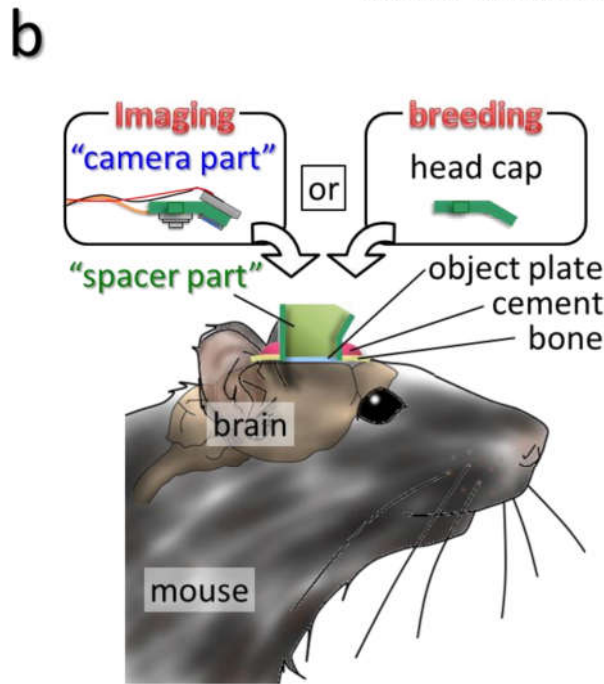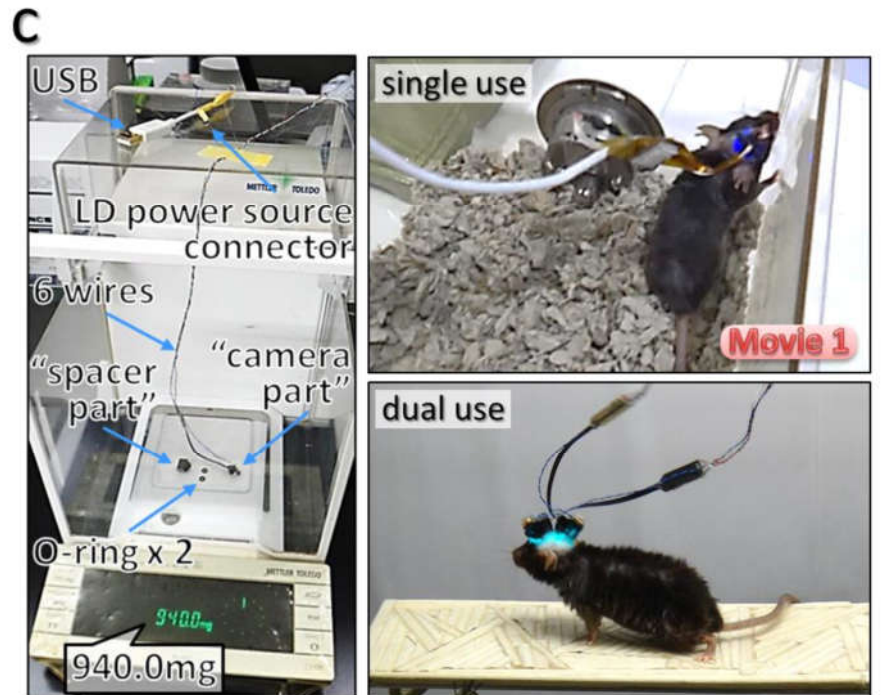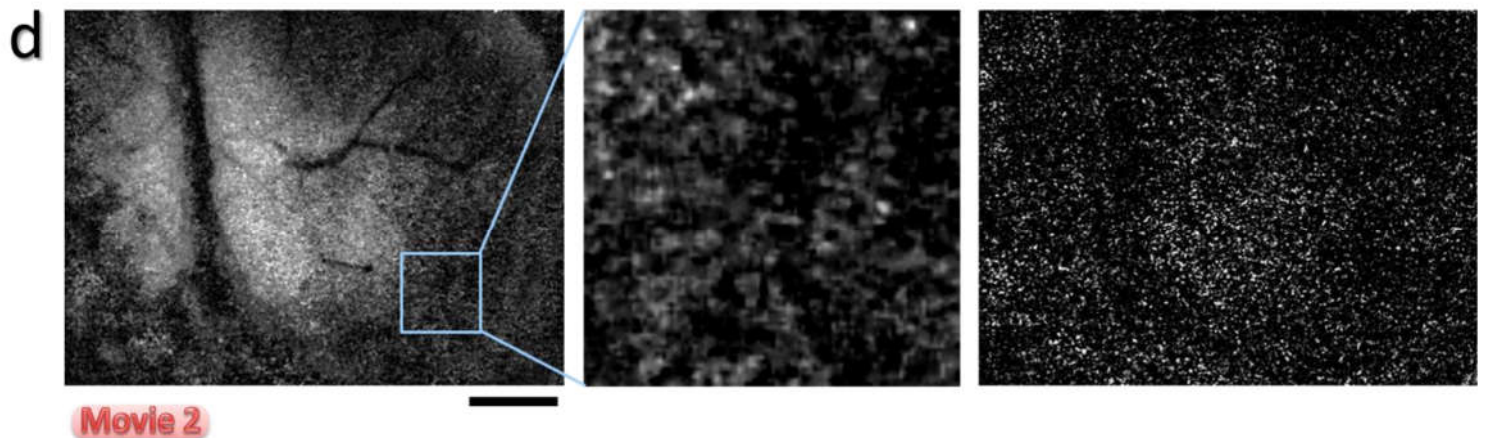

## Fig. 2

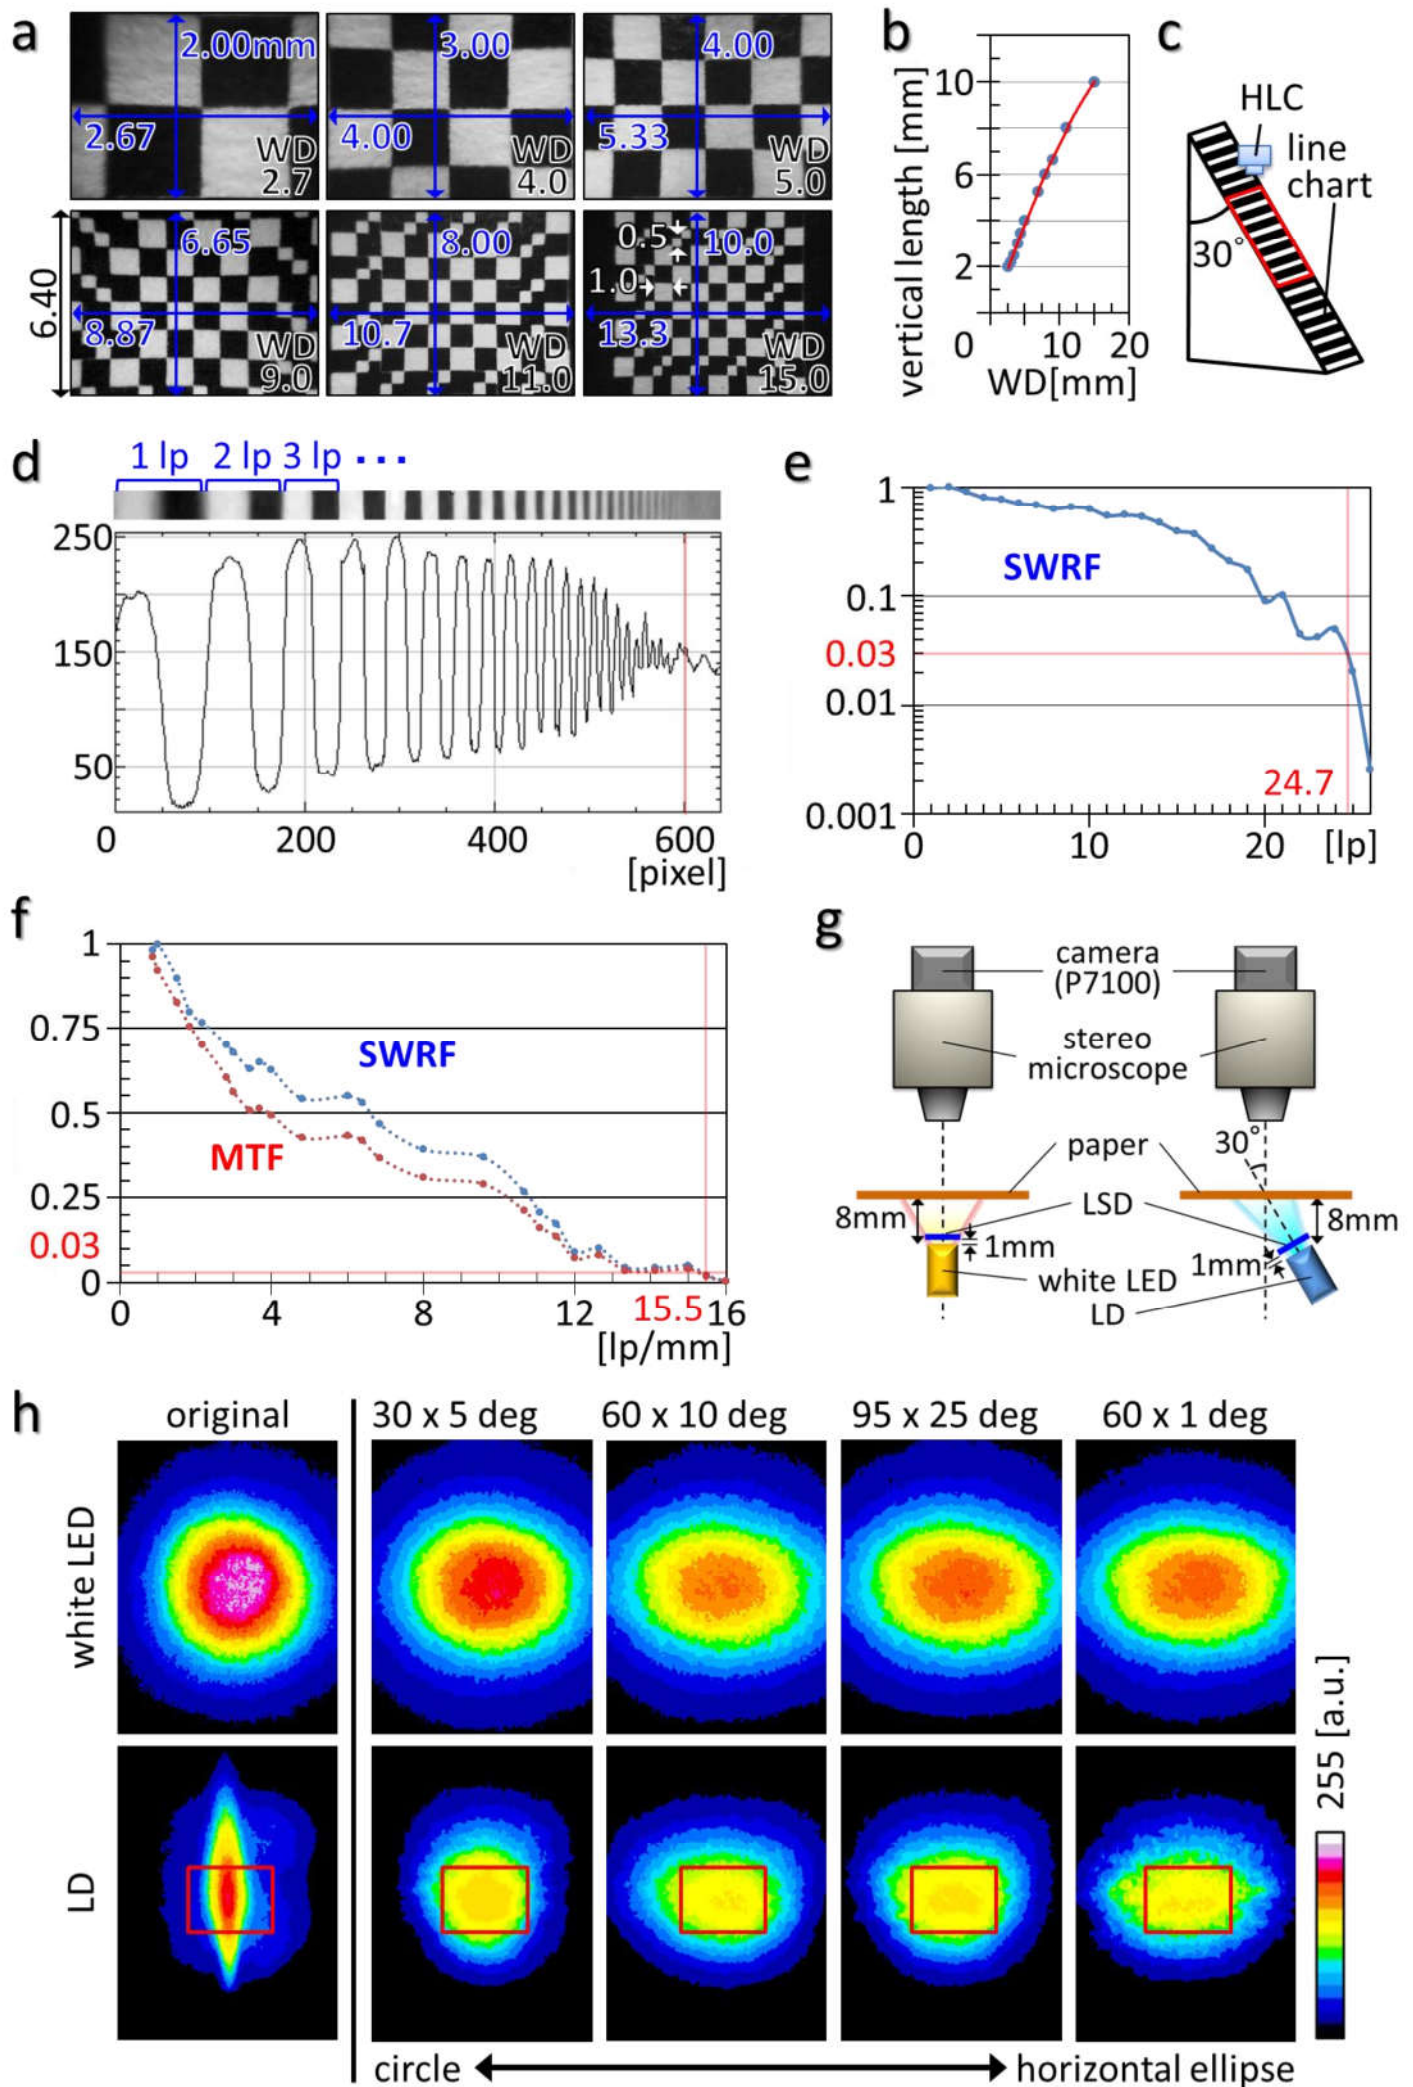

**Fig. 3**

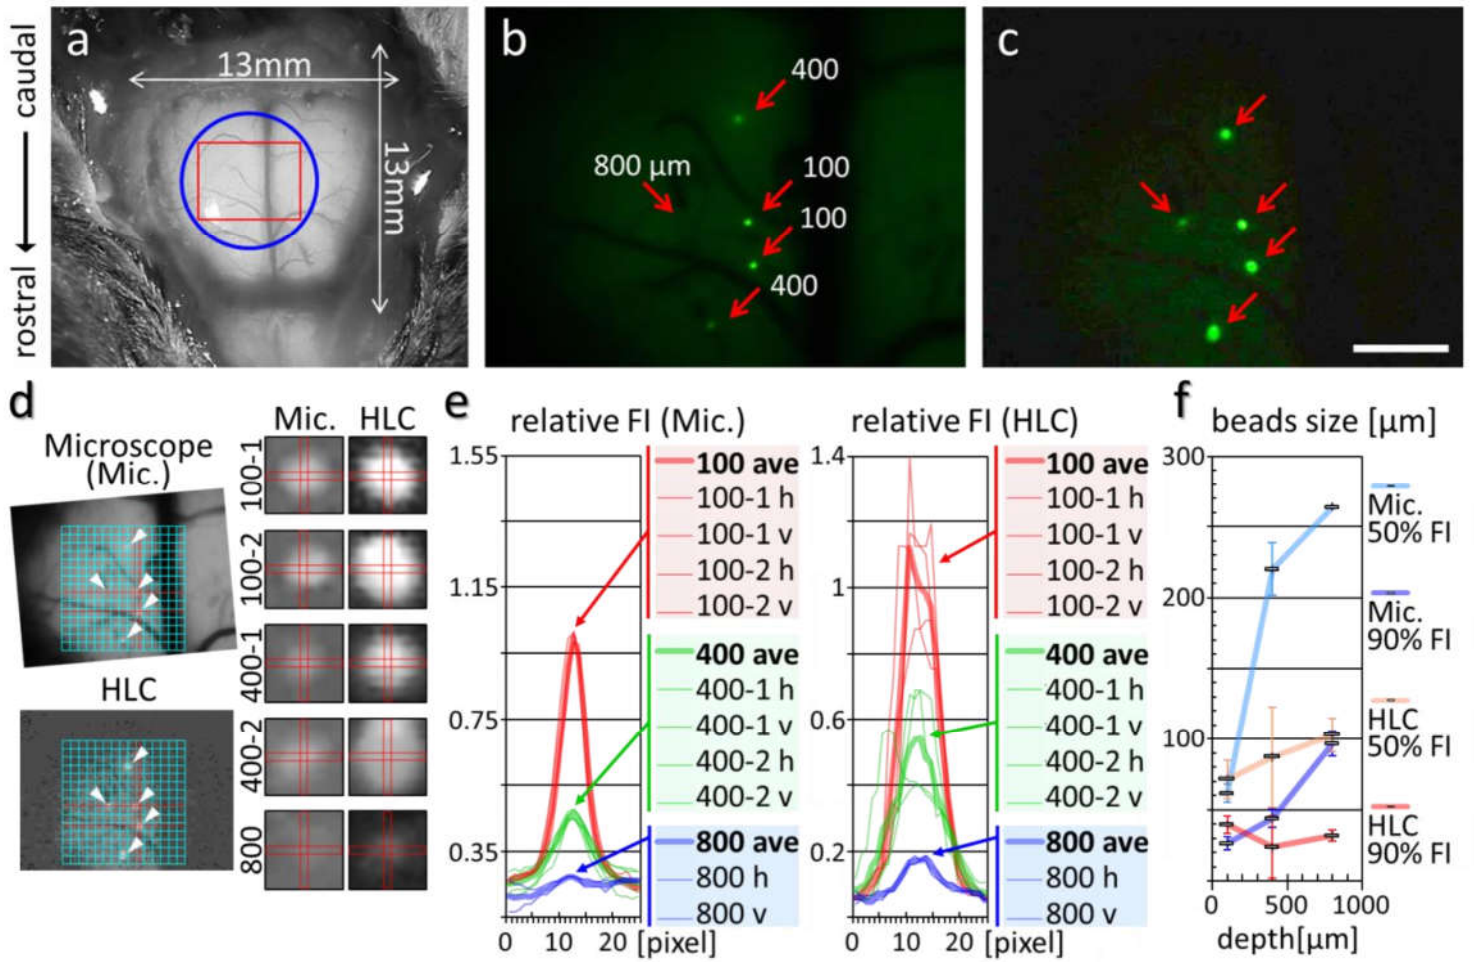

**Fig. 4**

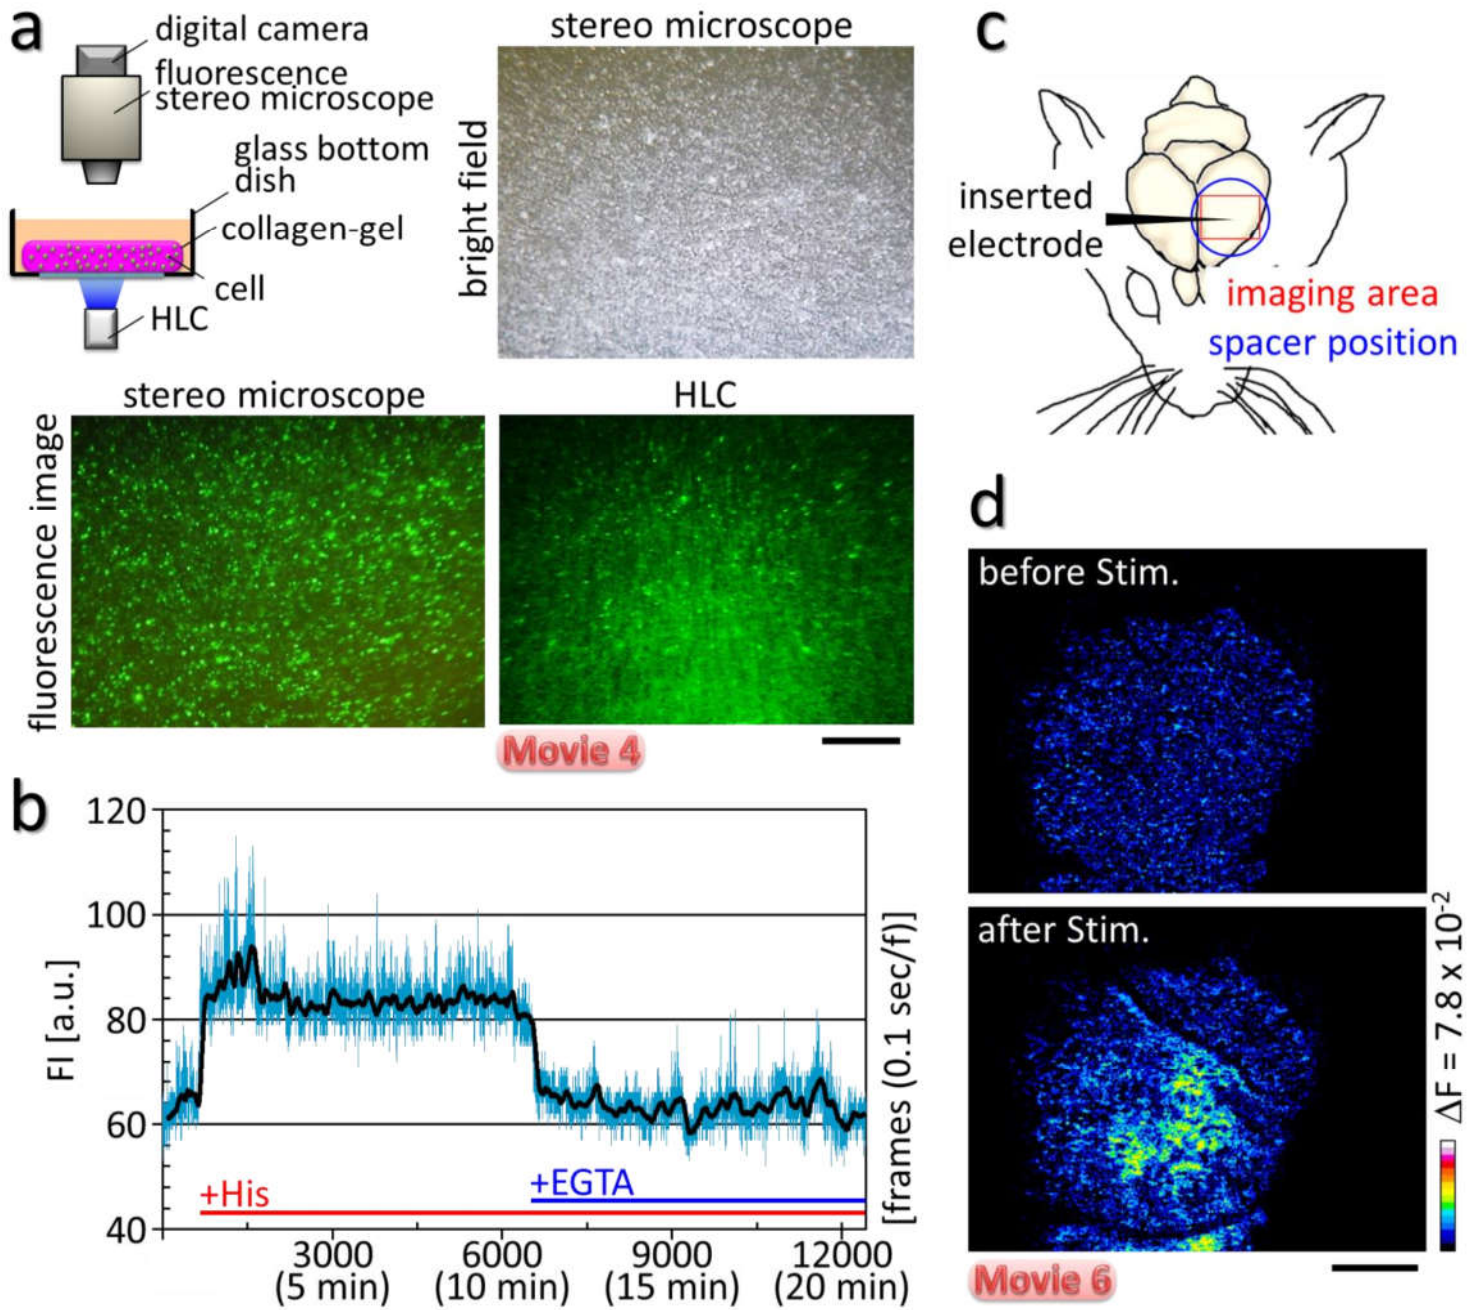

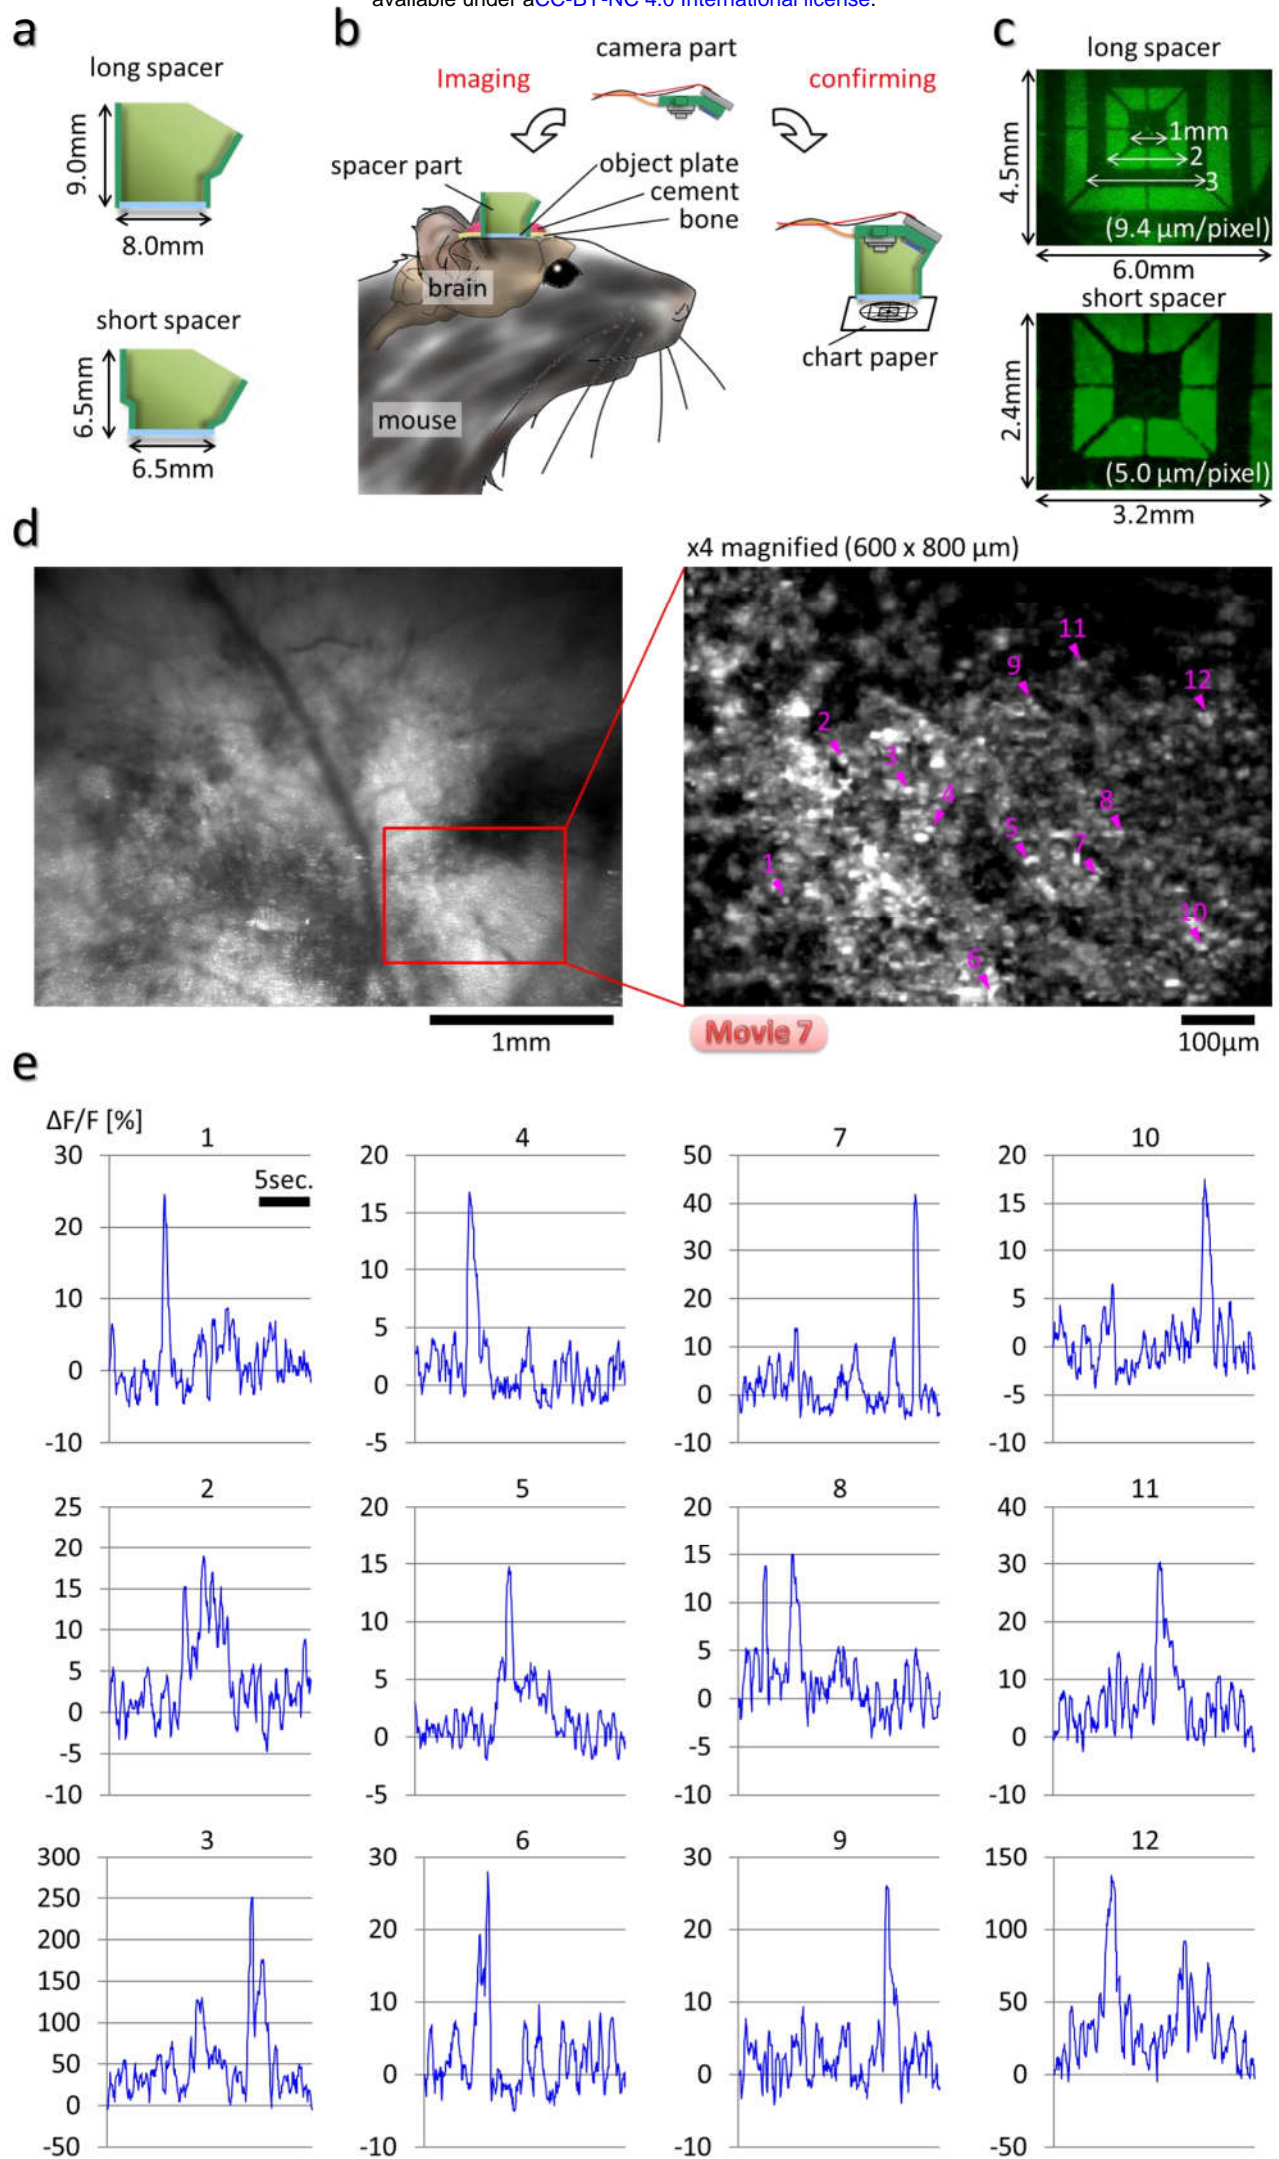

**Fig. 6**

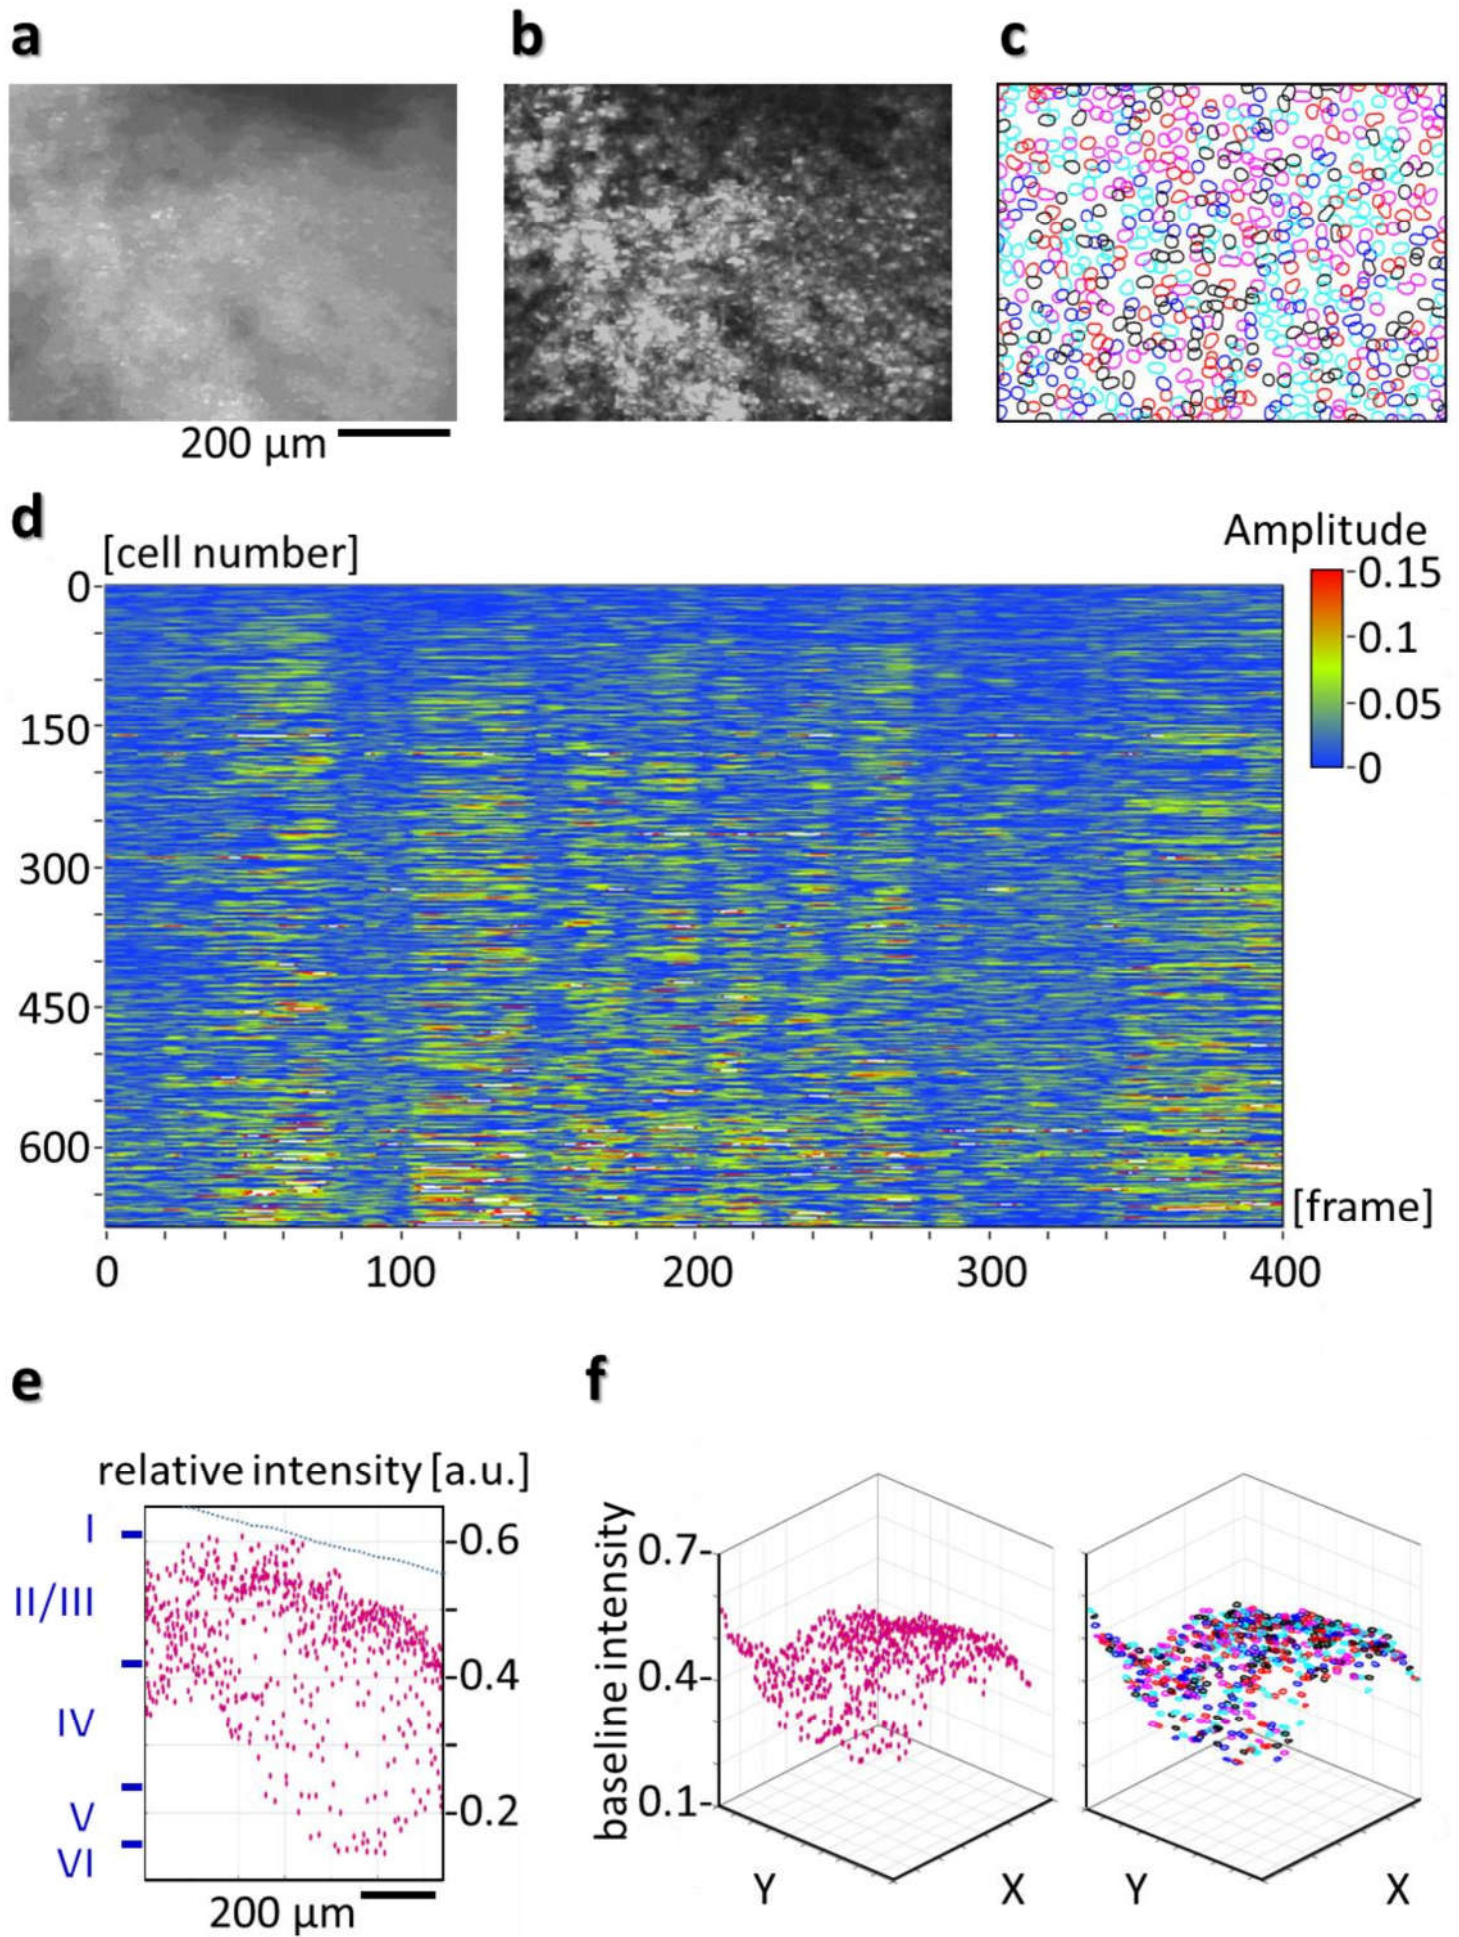

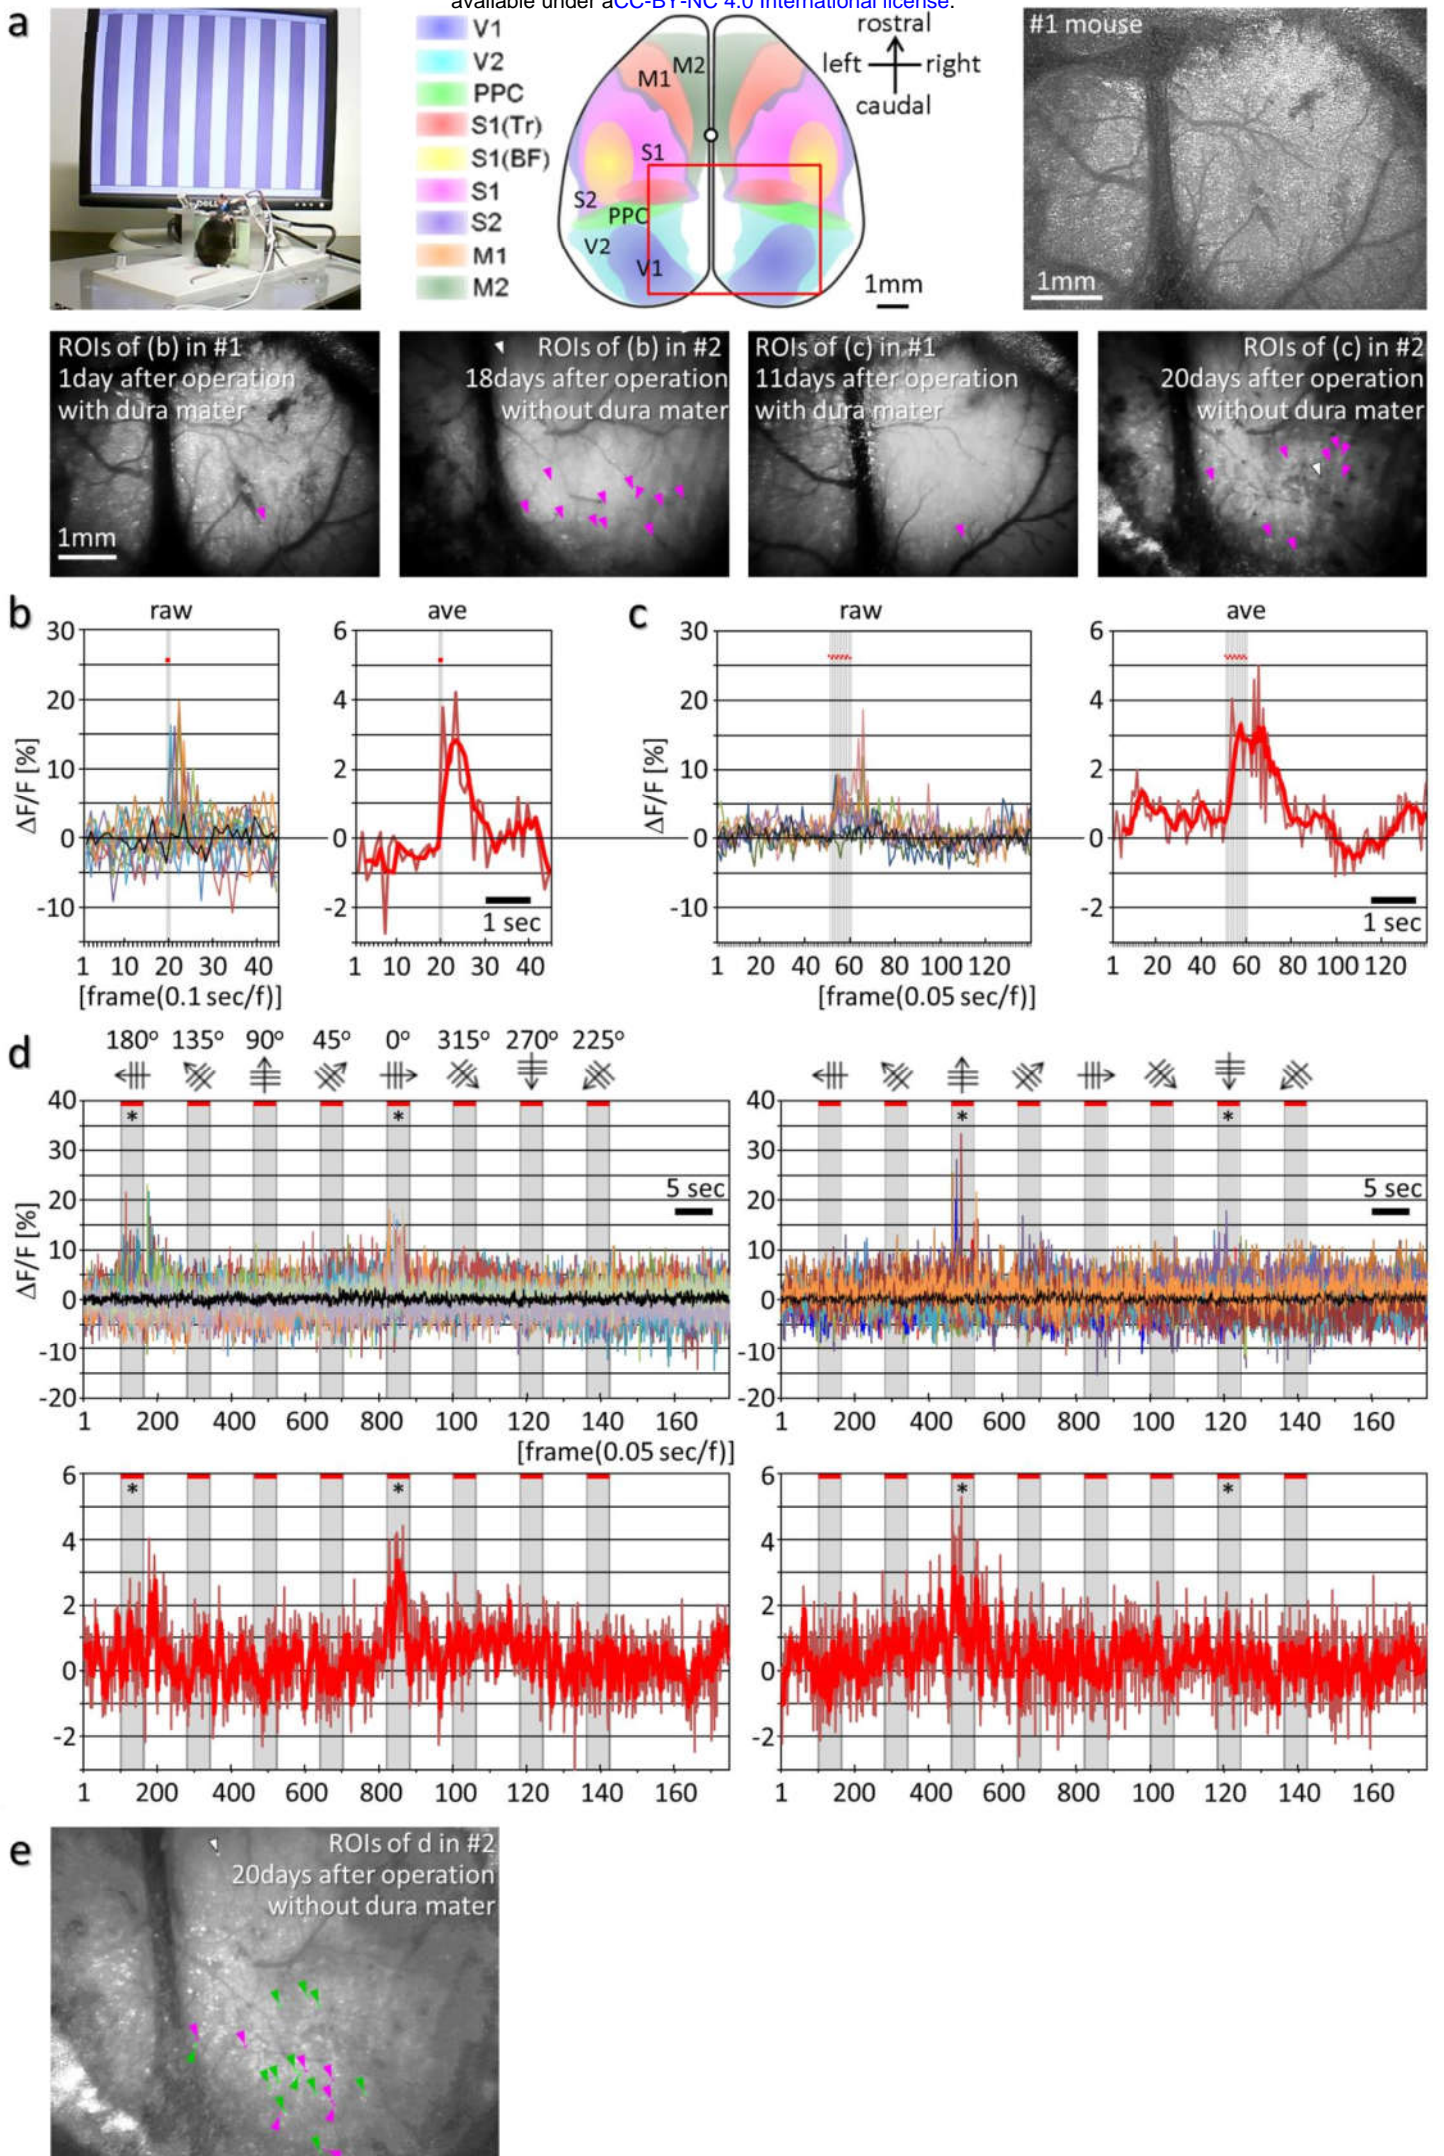



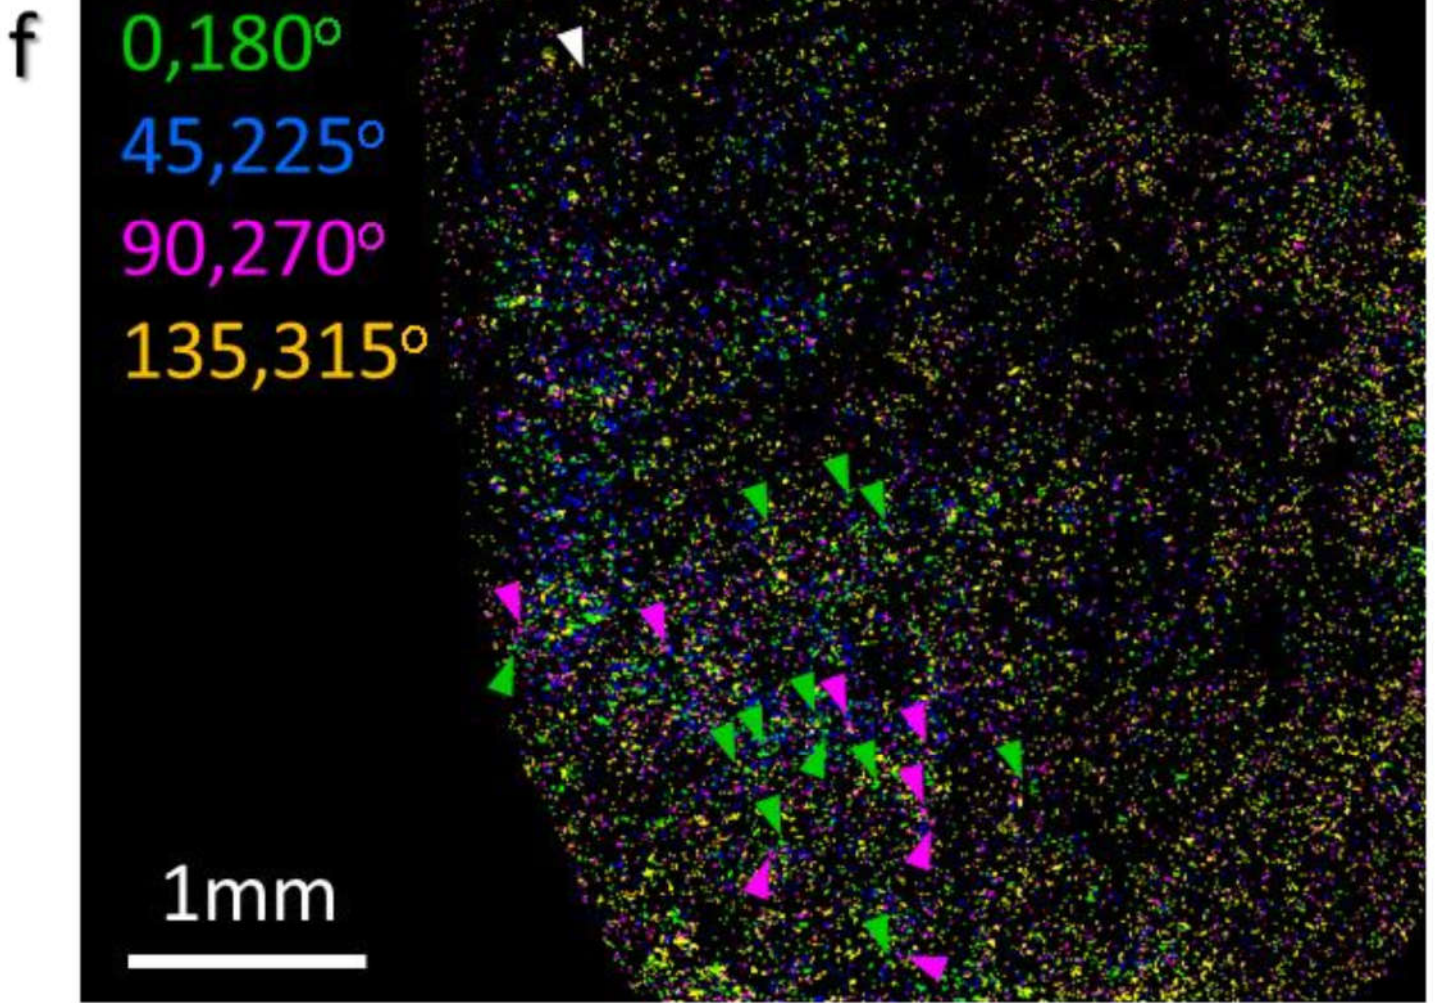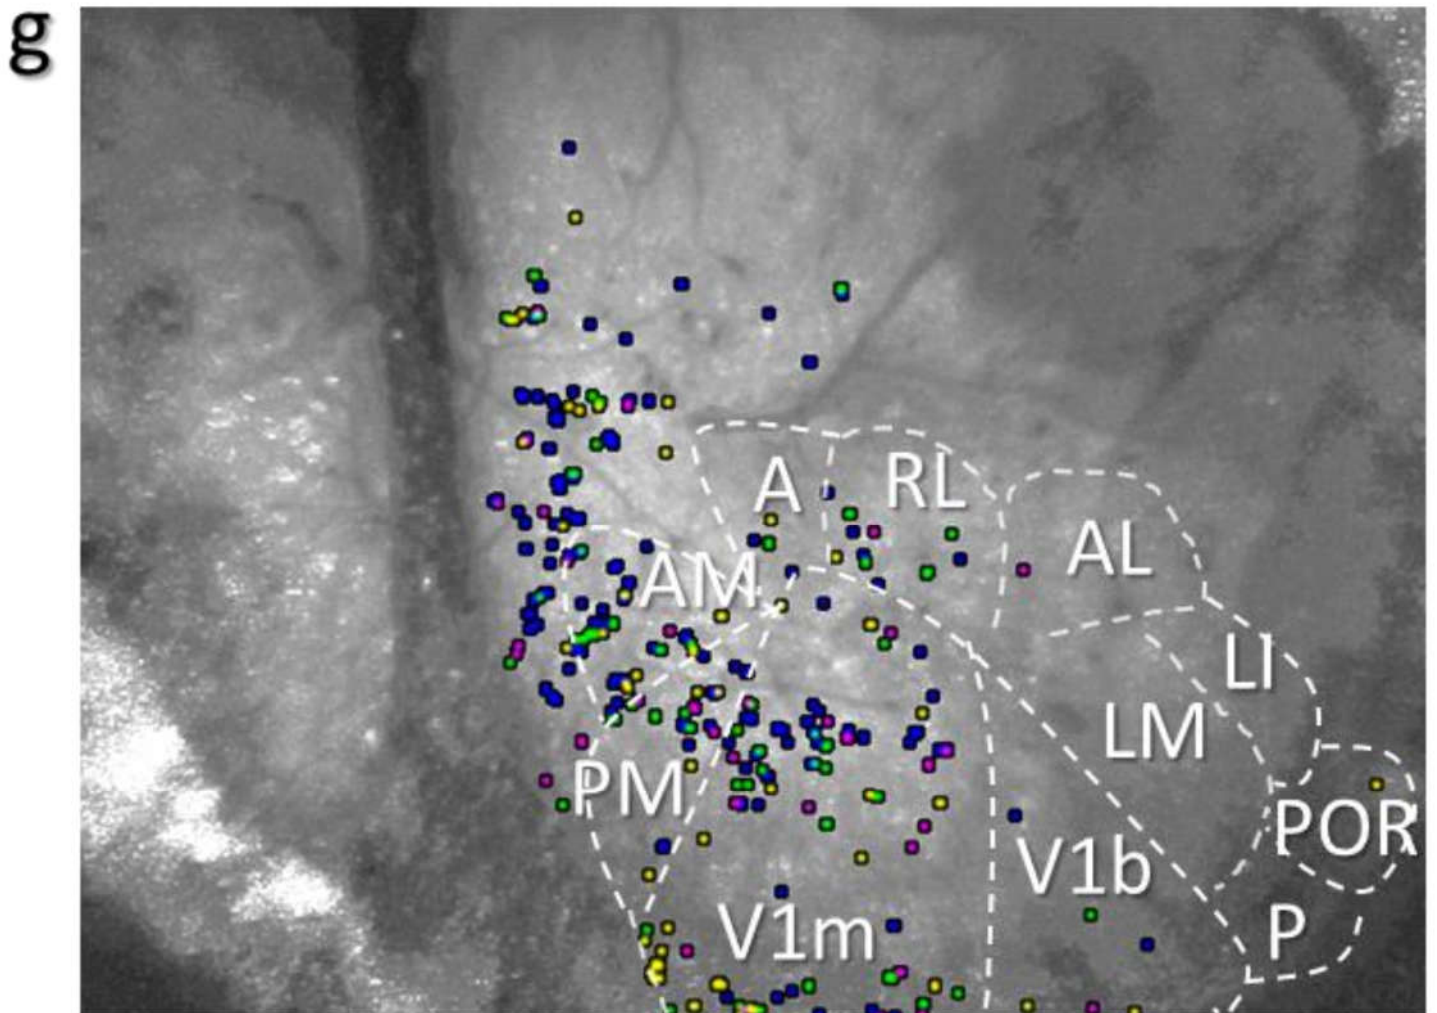

**Fig. 8**

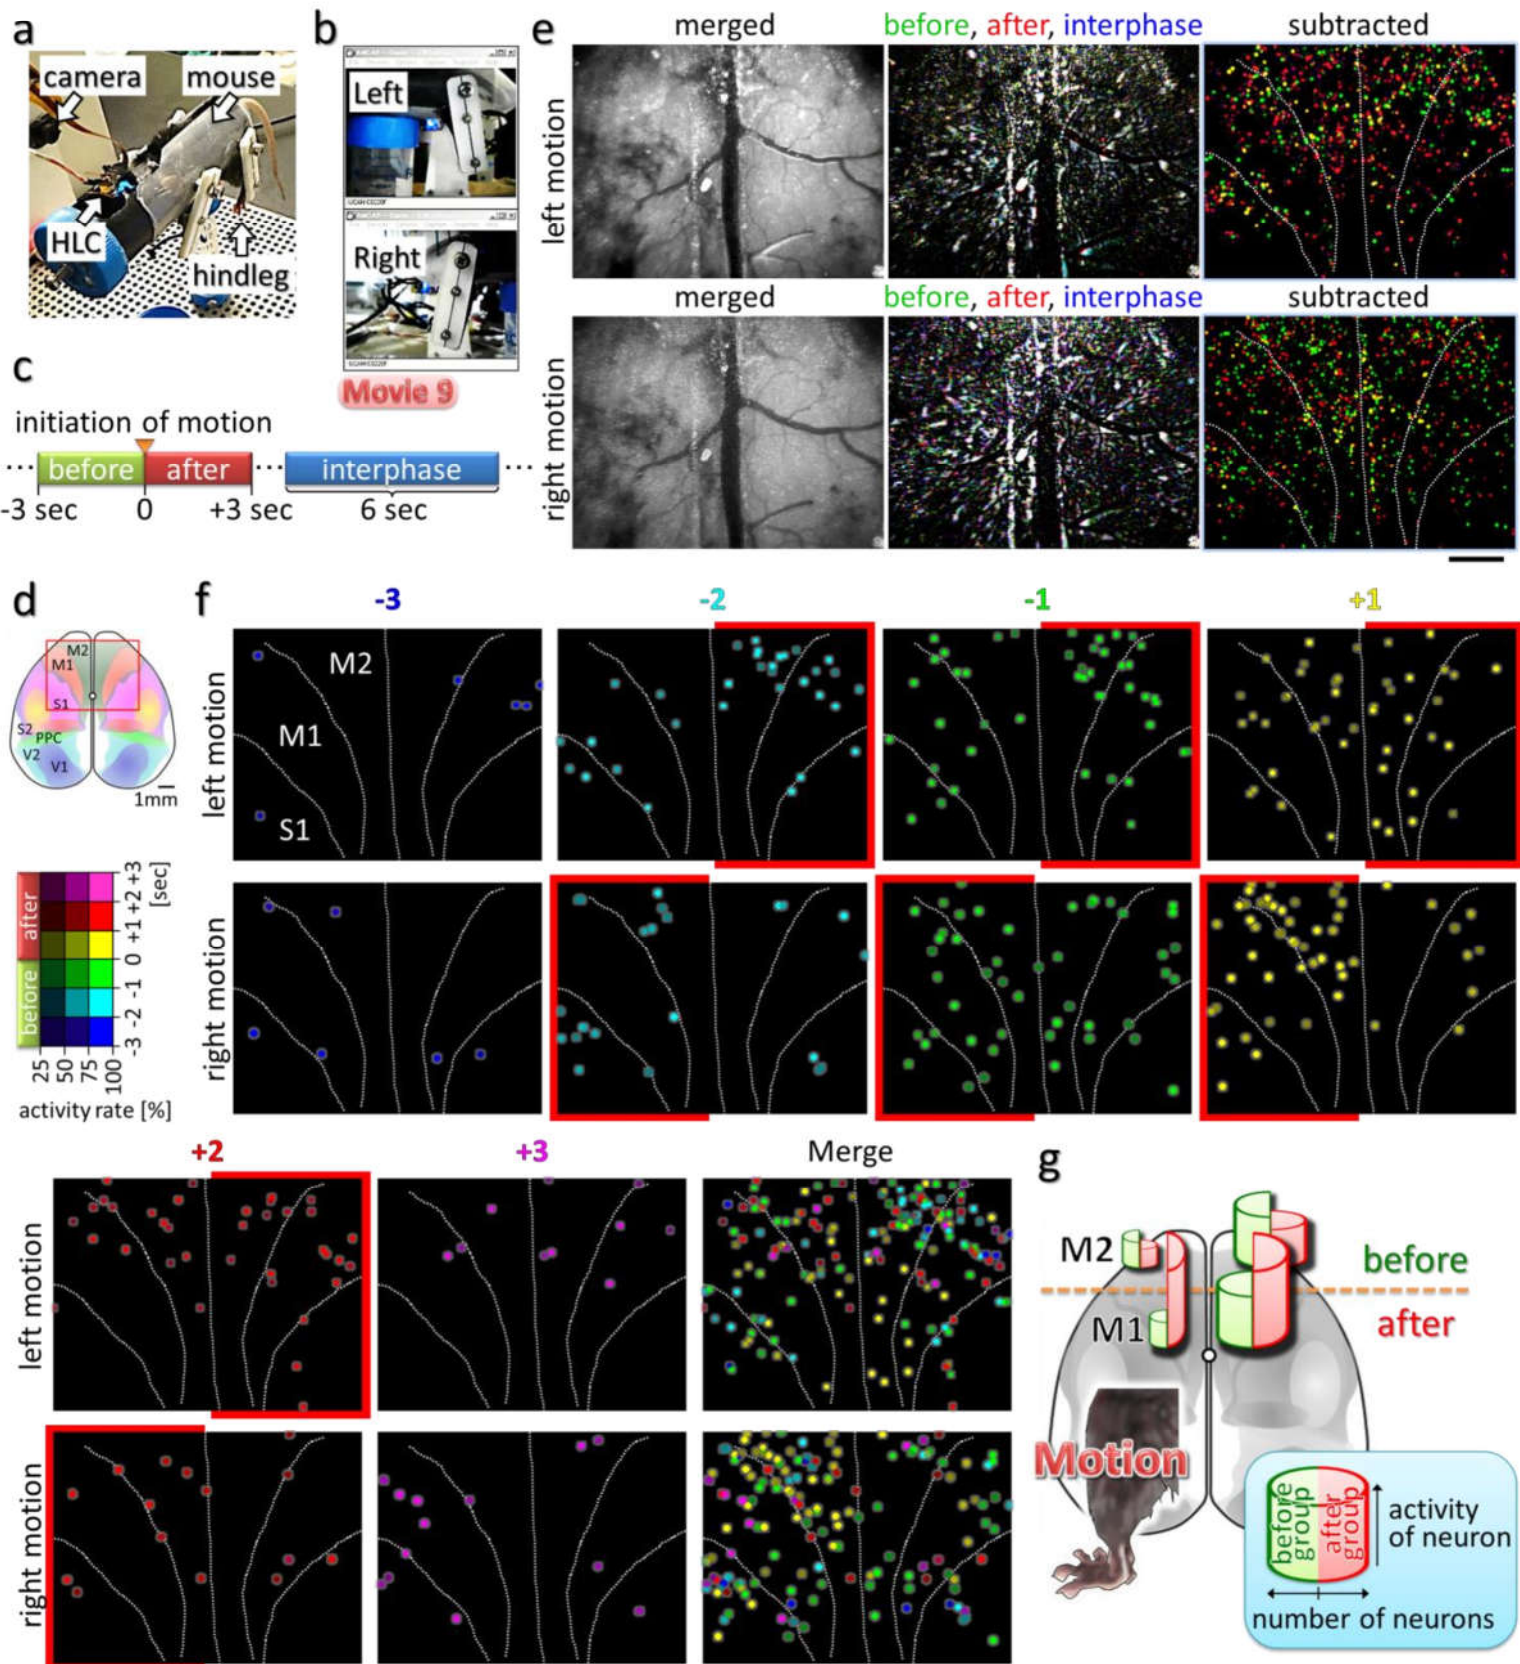

## Supplementary information

### Wide and Deep Imaging of Neuronal Activities by a Wearable NeuroImager Reveals Premotor Activity in the Whole Motor Cortex

Takuma Kobayashi<sup>1\*</sup>, Tanvir Islam<sup>1</sup>, Masaaki Sato<sup>2,3,4</sup>, Masamichi Ohkura<sup>2,3</sup>, Junichi Nakai<sup>2,3</sup>, Yasunori Hayashi<sup>3,5,6</sup>, Hitoshi Okamoto<sup>1\*</sup>

1. Laboratory for Neural Circuit Dynamics of Decision Making, RIKEN Center for Brain Science, Wako, Saitama 351-0198, Japan
2. Graduate School of Science and Engineering, Saitama University, Saitama, 338-8570, Japan
3. Brain and Body System Science Institute, Saitama University, Saitama, 338-8570, Japan
4. Laboratory for Mental Biology, RIKEN Center for Brain Science, Wako, Saitama 351-0198, Japan
5. RIKEN Center for Brain Science, Wako, Saitama 351-0198, Japan
6. Department of Pharmacology, Kyoto University Graduate School of Medicine, Kyoto 606-8501, Japan

\*Corresponding author. Tel.: +81 48 467 9713; Fax.: +81 48 467 9714.

E-mail address: [takuma.kobayashi@riken.jp](mailto:takuma.kobayashi@riken.jp); [dr.takuma.kobayashi@gmail.com](mailto:dr.takuma.kobayashi@gmail.com) (T. Kobayashi), [hitoshi.okamoto@riken.jp](mailto:hitoshi.okamoto@riken.jp) (H. Okamoto)

## Supplementary Fig. 1

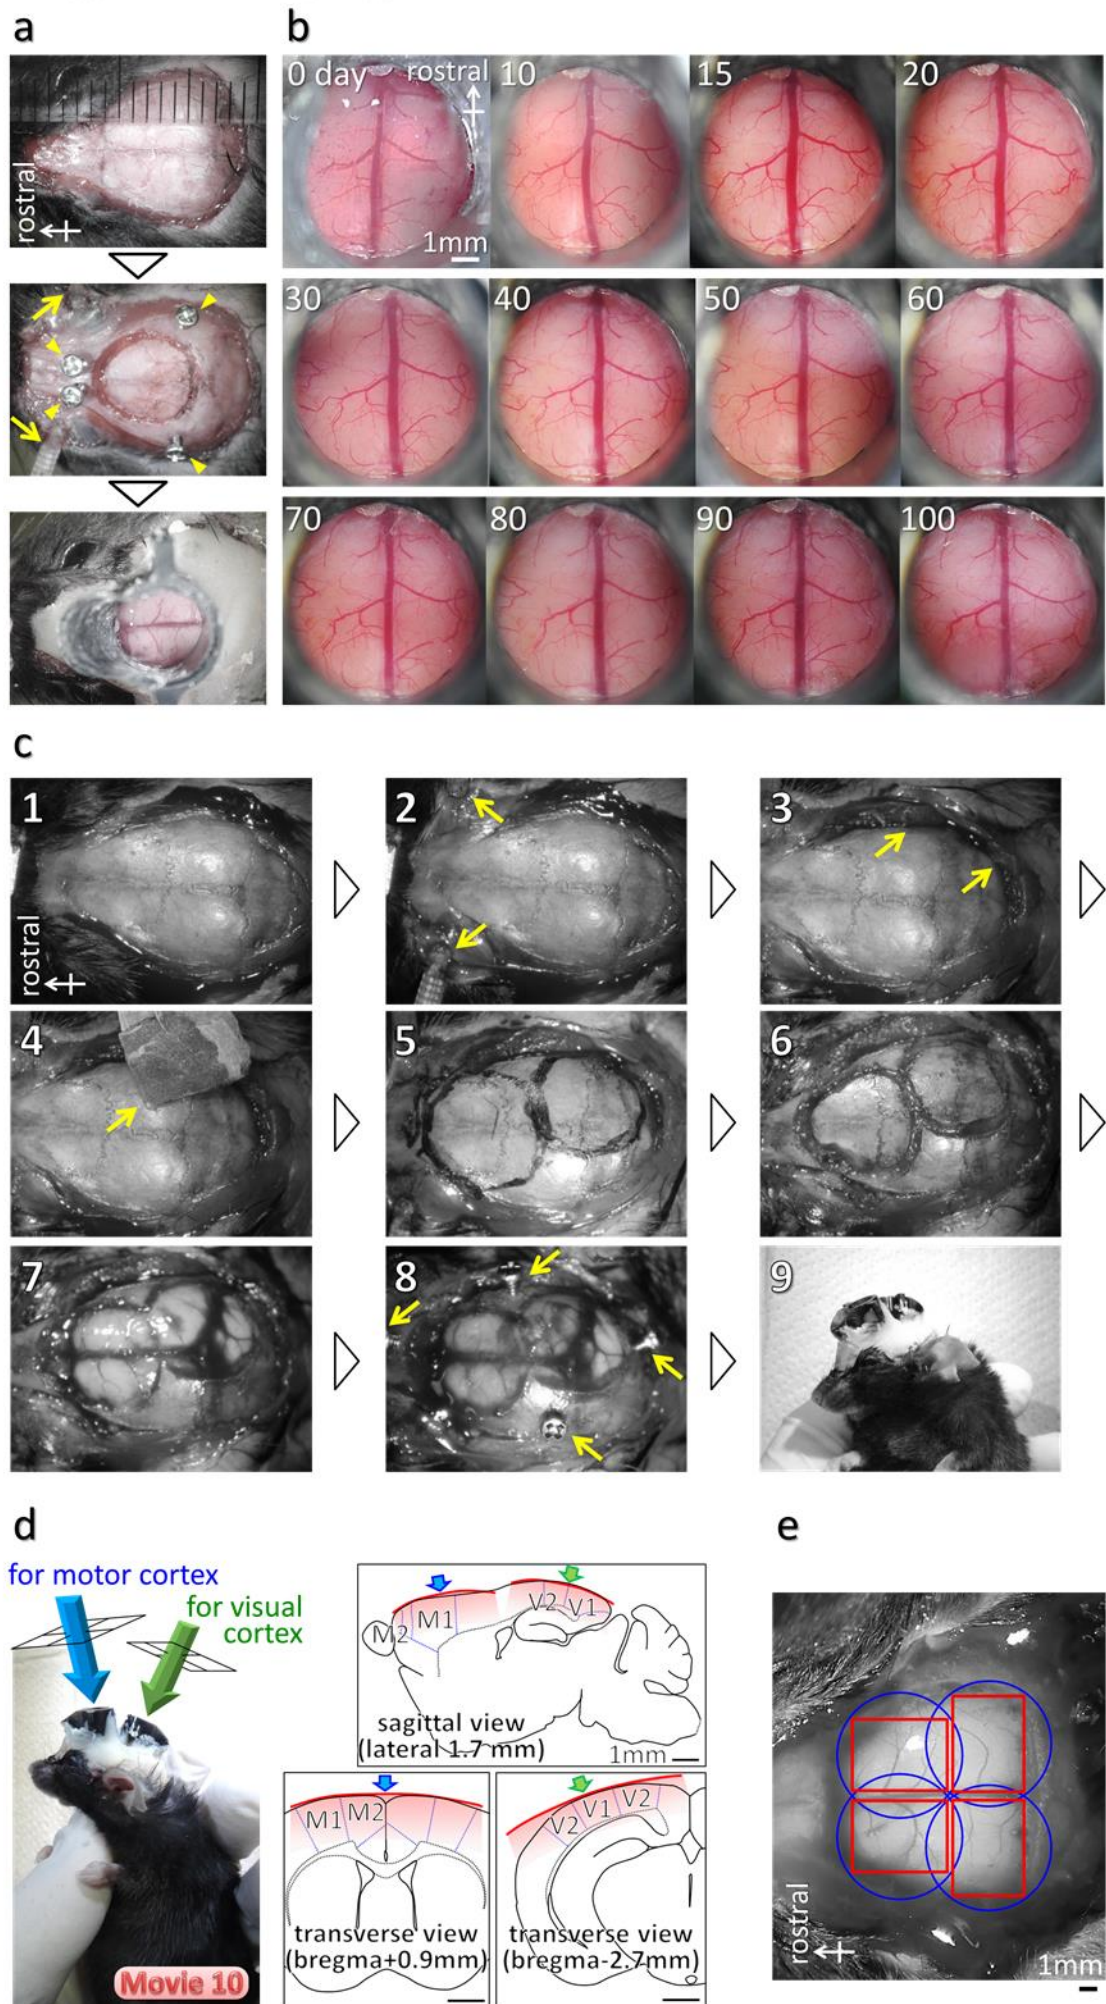

**Supplementary Fig. 1** The HLC allows long-term observation of the same brain area in the same mouse.

**(a)** Typical surgical operation and the process of the applying a single use of the HLC. The mouse was anesthetized with 2,2,2-tribromoethanol (125-250 mg/kg body weight<sup>40</sup>) or a combination anesthetic consisting of 0.3 mg/kg medetomidine, 4.0 mg/kg midazolam and 5.0 mg/kg butorphanol<sup>41</sup>, and was mounted on a stereotaxic instrument (Narishige Co., Japan). The head skin was scalped (upper panel). After craniotomy using a dental drill, the screws were inserted at bone positions around the hole to anchor the dental cement (yellow arrowheads in the middle panel). Eyelids were clamped with small forceps for protection (yellow arrows). The dura mater of the mouse was removed by using a hand-made sharpened tungsten needle gently and carefully. And then, the cylindrical spacer with a cranial window for imaging was attached to the mouse head by using dental cement (UNIFAST, GC, Co, Japan) (lower panel).

**(b)** Images show the temporal serial observation of the same mouse using a stereo microscope. Some part of the brain surface causes bleeding just after removing the dura although the extent of bleeding depends on operational skill. Bleeding was promptly stopped and the microvessels recovered in 4-5 days. Thereafter, the observation surface was kept clean for more than 100 days. During this long-term housing, neuronal activity could be visualized using the HLC and conventional 2-photon microscopy through the cranial window of the spacer apparatus ([Supplementary Fig. 7](#)).

**(c)** For multi-point imaging using two HLCs, surgical operation and the processes are shown. The detailed order of each process is described below;

- 1) Scalp removal.
- 2) Eyelid clamping using a small forceps for protection (yellow arrows).
- 3) Peeling part of the muscles of temporal and occipital regions (yellow arrows).
- 4) Removing the periosteum with water-resistant sandpaper (yellow arrow) (e.g. #600 waterproof paper file).
- 5) Marking the craniotomy position.
- 6) Drilling the skull by using a dental drill.
- 7) Removing the skull (optional: removing the dura mater).
- 8) Anchoring the screws (yellow arrows) (e.g. #0 pan head, M1.0 x 2.0 mm).
- 9) Attaching the cranial window parts with dental cement. Two cylindrical spacers with cranial windows were put on the cortex by using a precision manipulator to firmly support their positions, and then the spacers were fixed to the skull with dental cement. Besides, for behavioral testing under bright environments, black liquid rubber may be applied around the spacer and the dental cement for light interception.

**(d)** Example of installation of duplicate spacers for visual-motor imaging in the freely moving CaMK2a-G-CaMP7 mouse ([Supplementary Movie 10](#)). Blue or green arrows indicate the direction of observation from the HLC for imaging including the whole motor area of bilateral cortex or the

whole hemispheric visual area, respectively (left picture). The right panels show the directions of observation and the thick and convex area of imaging by the HLC (red line and graded red area, see also right image in [Supplementary Fig. 6b](#)) both in the sagittal (upper panel) and the cross (lower panels) sections. Use of multiple cameras allows the broad area imaging of the curved cortex at cellular resolution ( $>4.17 \mu\text{m}/\text{pixel}$ ).

**(e)** Schematic image of the application of four HLCs. Blue circle and red square indicate the position of the spacer and the imaging area, respectively. The quadra imaging achieves simultaneous imaging of the entire cerebral cortex. As mentioned in [Fig. 2a](#), one HLC can capture a wide field of view of  $10.0 \times 13.3 \text{ mm}$ . This size is almost equal to one brain of the mouse. However, in that case, the resolution is lowered to  $20.8 \mu\text{m}/\text{pixel}$ , and the sight from a single direction distorts the image of the spherical brain near its periphery. With multi-point thick imaging, it is possible to image at a high resolution with low distortion along the curvature of the cortex.

## Supplementary Fig. 2

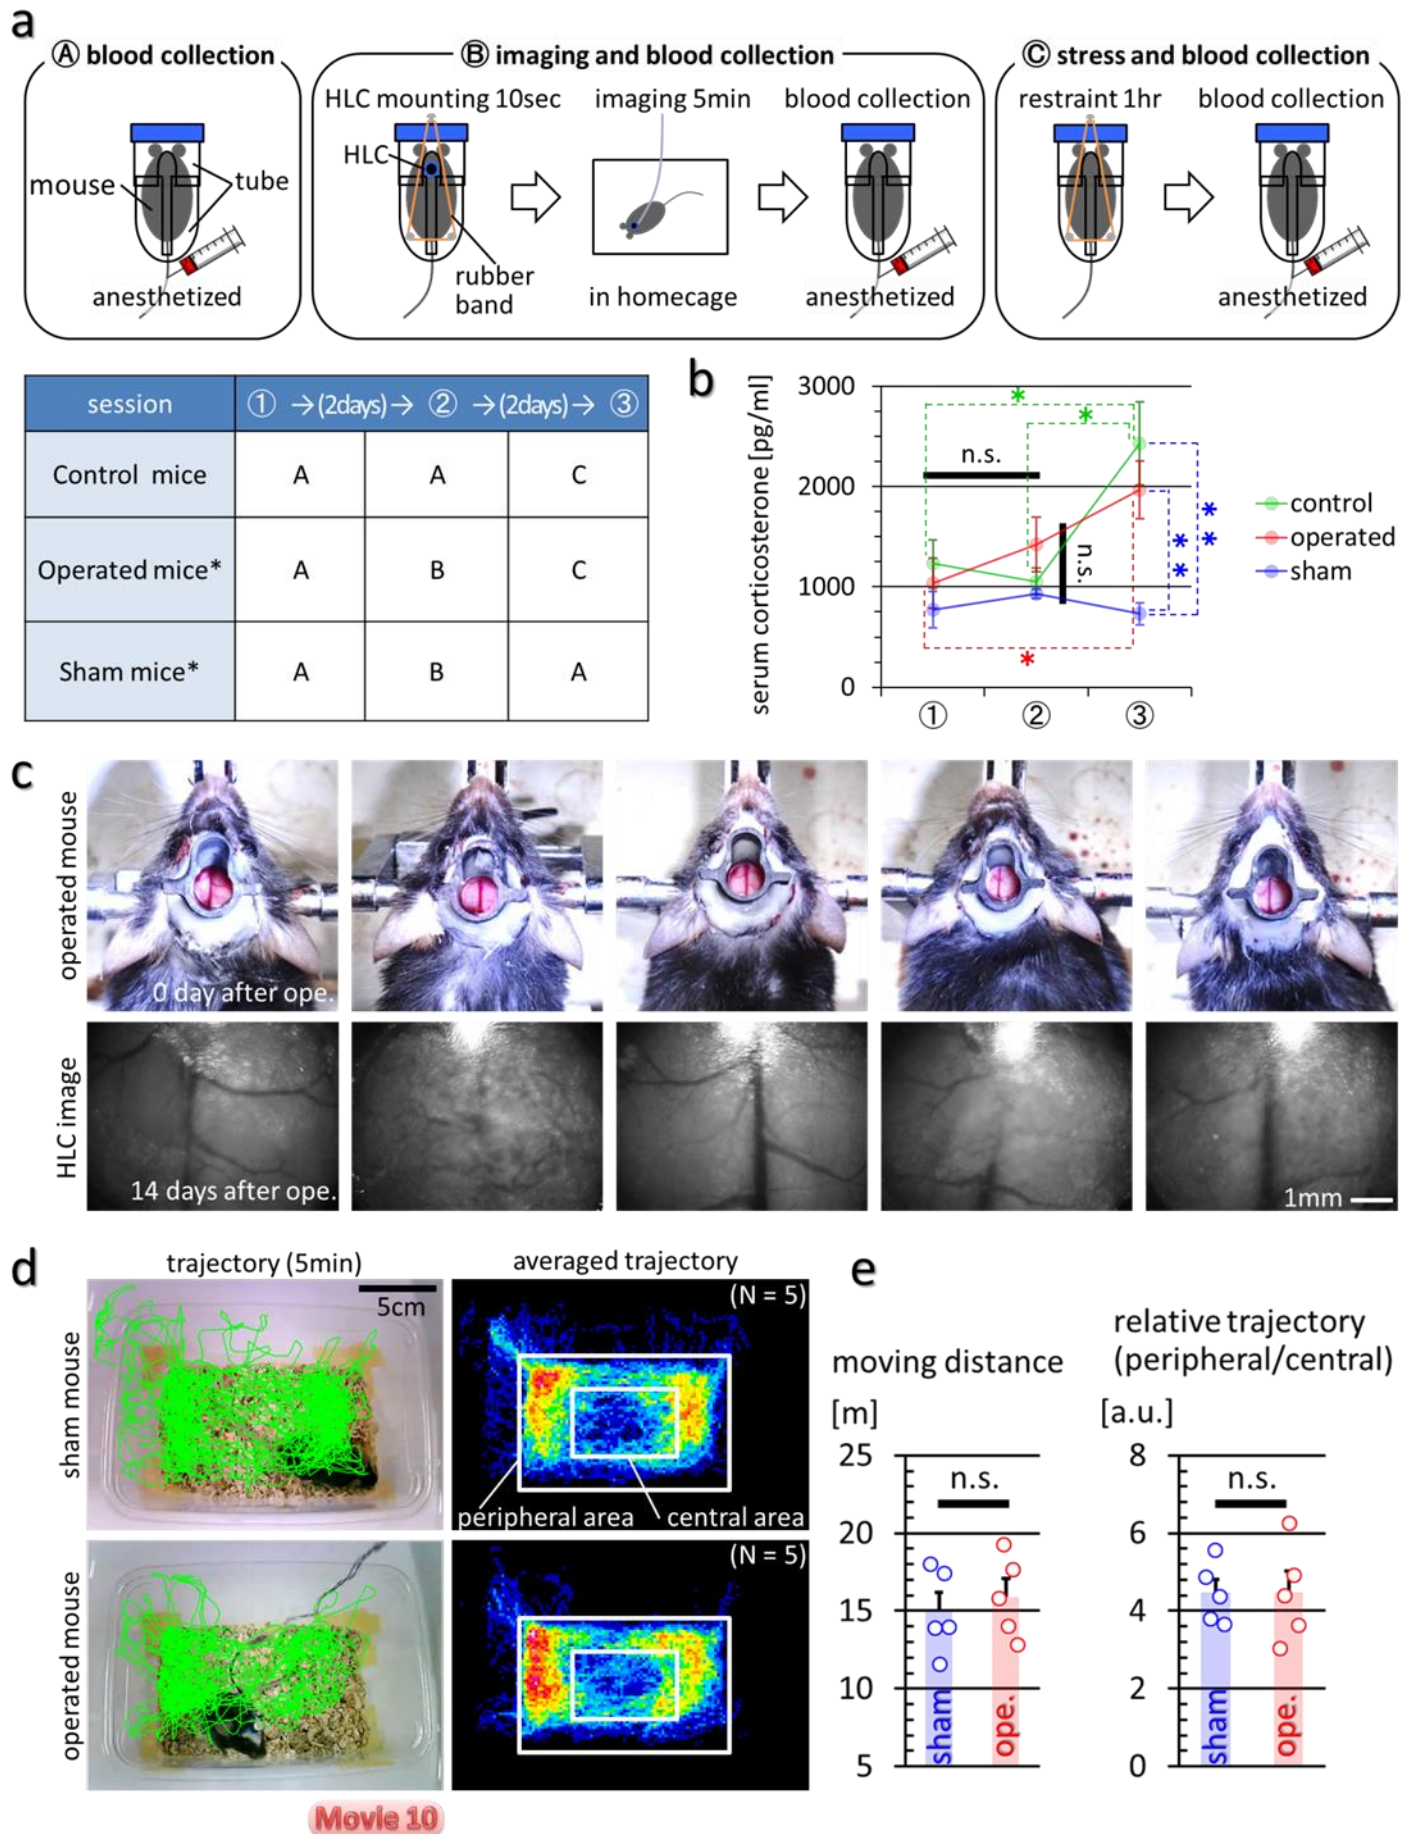

**Supplementary Fig. 2** The imaging of neuronal activities by the HLC attached to the head of freely moving mice causes no significant increase of stress, and does not affect the locomotor activity and the behavioral pattern.

Blood-based and behavioral assessments of stress caused by wearing the HLC were performed.

**(a)** Corticosterone produced in response to stress was measured. Schematic images of experimental procedures are shown in A-C (upper images). These 3 different experiments were conducted in 3 sessions every 3 days for 3 groups of mice (each N = 5, total 15 mice) (lower table). 8-10 months old C57BL/6JJmsSlc male mice were purchased (Japan SLC, Inc., Japan). A group of mice with an asterisk were given the 5 minutes daily handling for 1 week prior to the experimental session. “Operated mice” were attached with the spacer apparatus with cranial window on his frontal cortical area by surgical operation performed 2 weeks before this experiment. “Sham mice” are the wild-type mice which underwent the same treatment as in the procedure B but were not mounted with the HLC.

**(b)** The result of ELISA assay of the serum corticosterone level is shown. All procedures were performed according to the manufacturer’s protocol (Corticosterone ELISA Kit, Cayman Chemical Company, USA). Error bar is a standard error of the mean. T-test was performed after F-test for judging significance. Single asterisks mean there is the significance of  $p < 0.05$  between session 1 and 3 ( $p = 0.0271$ ), session 2 and 3 ( $p = 0.0137$ ) in control mice, and between session 1 and 3 ( $p = 0.0213$ ) in operated mice. Double asterisks mean there are significance of  $p < 0.01$  between control and sham mice ( $p = 0.0067$ ), operated and sham mice ( $p = 0.0049$ ) in session 3. There are no significance (n.s.) between session 1 and 2 in all mice group, and between control, operated and sham mice in session 2. These results indicate that the HLC mounting and imaging process causes no significant increase in stress in the mice.

**(c)** These photos show the individual operated mice and their frontal cortical image taken by the HLC under the freely moving condition (“ope.” means the surgical operation).

**(d)** The locomotor activity in the homepage from which the lid was removed was examined. Left column images indicate the examples of the moving trajectory for 5 minutes by a sham and an operated mouse ([Supplementary Movie 10](#)). Right column images indicate an averaged trajectory of 5 sham and operated mice. The averaged trajectories were binned with 5 x 5 pixels, and shown with pseudo-color. The bottom of the homepage was subdivided into the central and peripheral areas as indicated in the figures.

**(e)** The numerical analyses of (d) are shown in the graphs. Error bar is a standard error of the mean. Each circle indicates the value of each individual. There is no significance (n.s.) between the sham and operated mice in the moving distance or the distribution of the trajectory. These results suggest that HLC mounting and imaging process does not affect the locomotor activity and the behavioral pattern.



## Supplementary Fig. 3

a

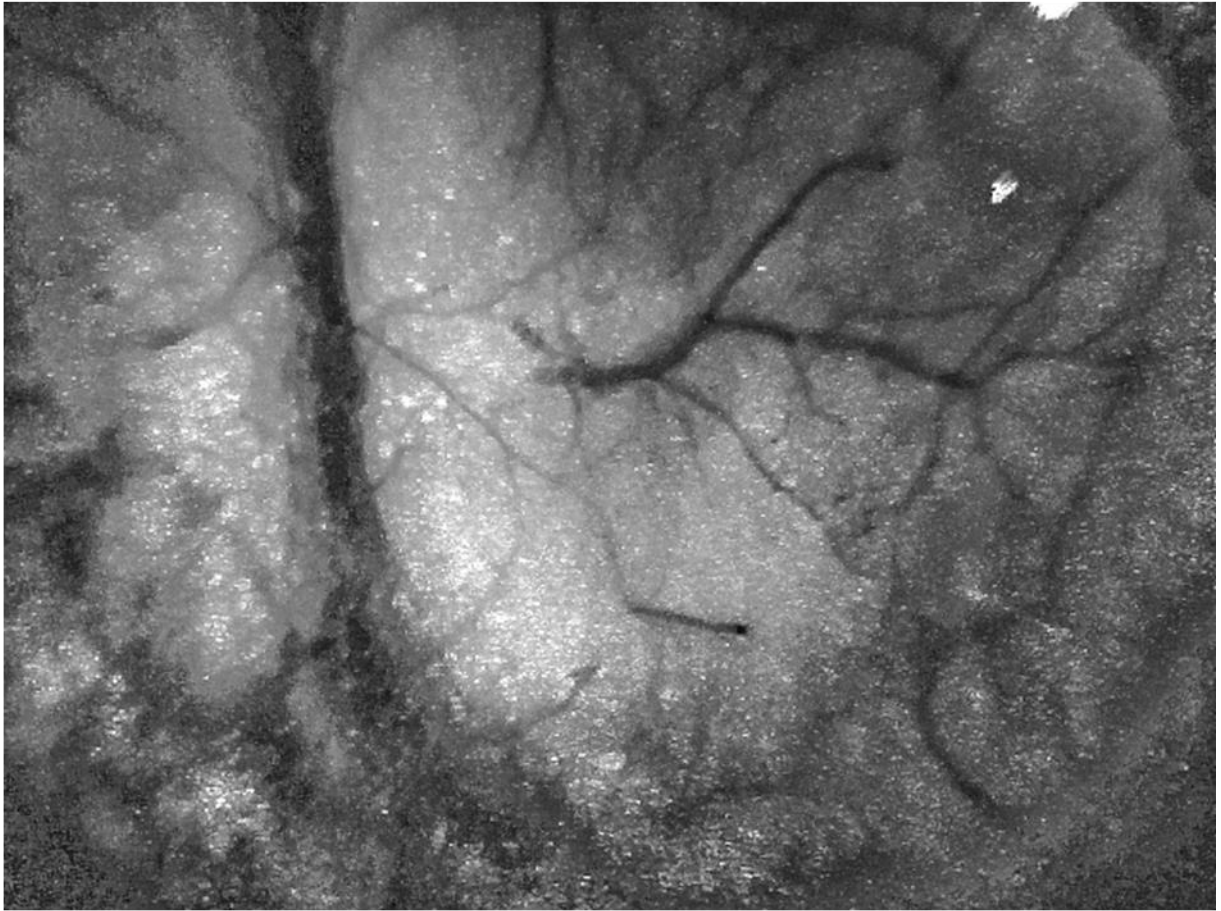

Movie 3

b

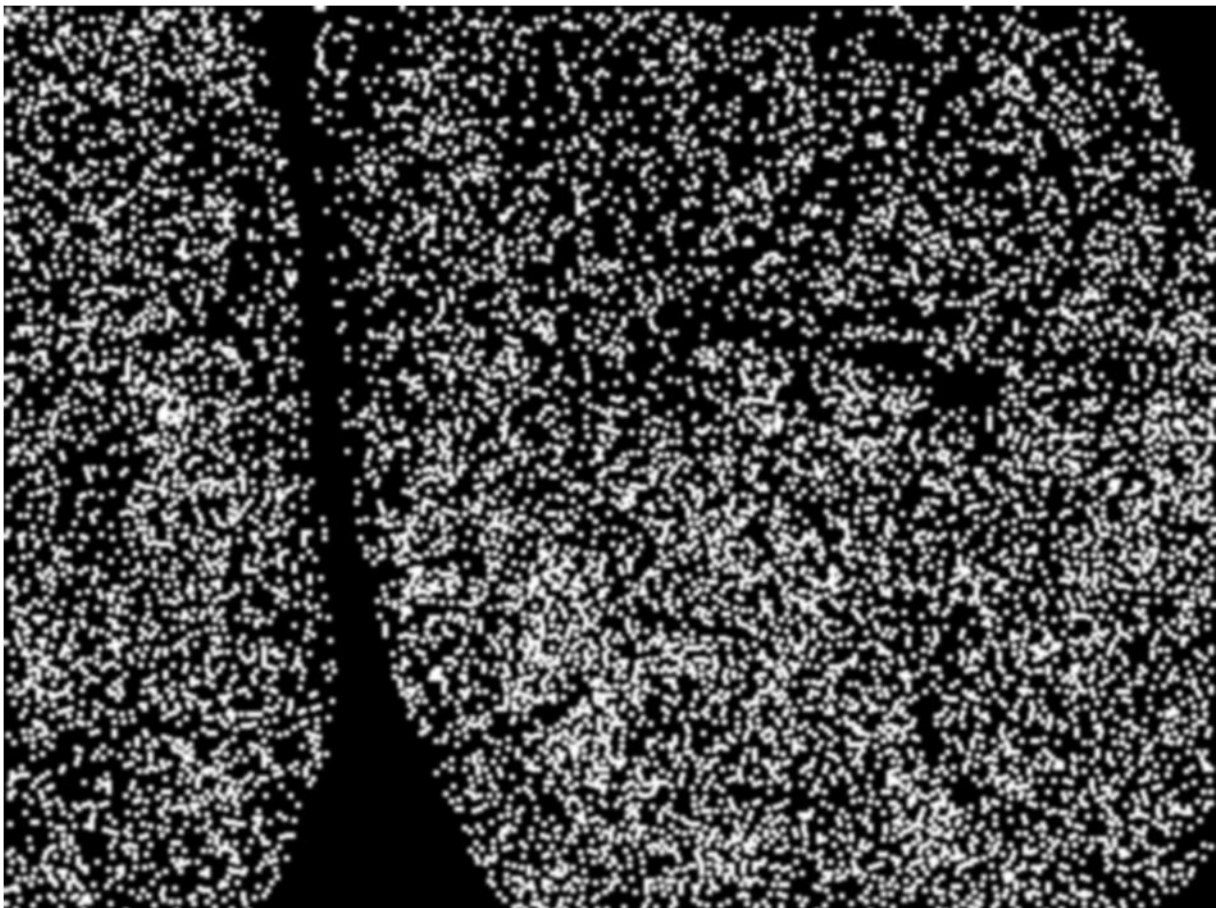

**Supplementary Fig. 3** Automated selection and counting of discriminable blinking light spots.

**(a, b)**  $\text{Ca}^{2+}$  imaging was performed by the HLC on the visual cortex of the CaMK2a-G-CaMP7 transgenic mouse (Fig. 7). In order to estimate how many excitatory neurons can be detected and discriminated in the occipital area including the visual cortex by the HLC, the merged image was analyzed by counting the number of peak fluorescence spots (see for detail [Methods section](#)). 8 raw movies for 1 min were taken by the HLC and merged by maximization. A representative 10 seconds of the merged movie is shown in [Supplementary Movie 3](#), and the results from where all frames were merged by maximization is shown in (a). Bar indicates 1 mm. The maximum points of the fluorescence spots of (b) are shown in (a). 9352 light spots could be discriminated within a single field of view by one HLC (4.25 x 5.66 mm,  $30.7 \times 10^4$  pixels, 8.8  $\mu\text{m}/\text{pixel}$ , 1-6 pixel/spot in (a), 5 pixel/dot in (b)).

## Supplementary Fig. 4

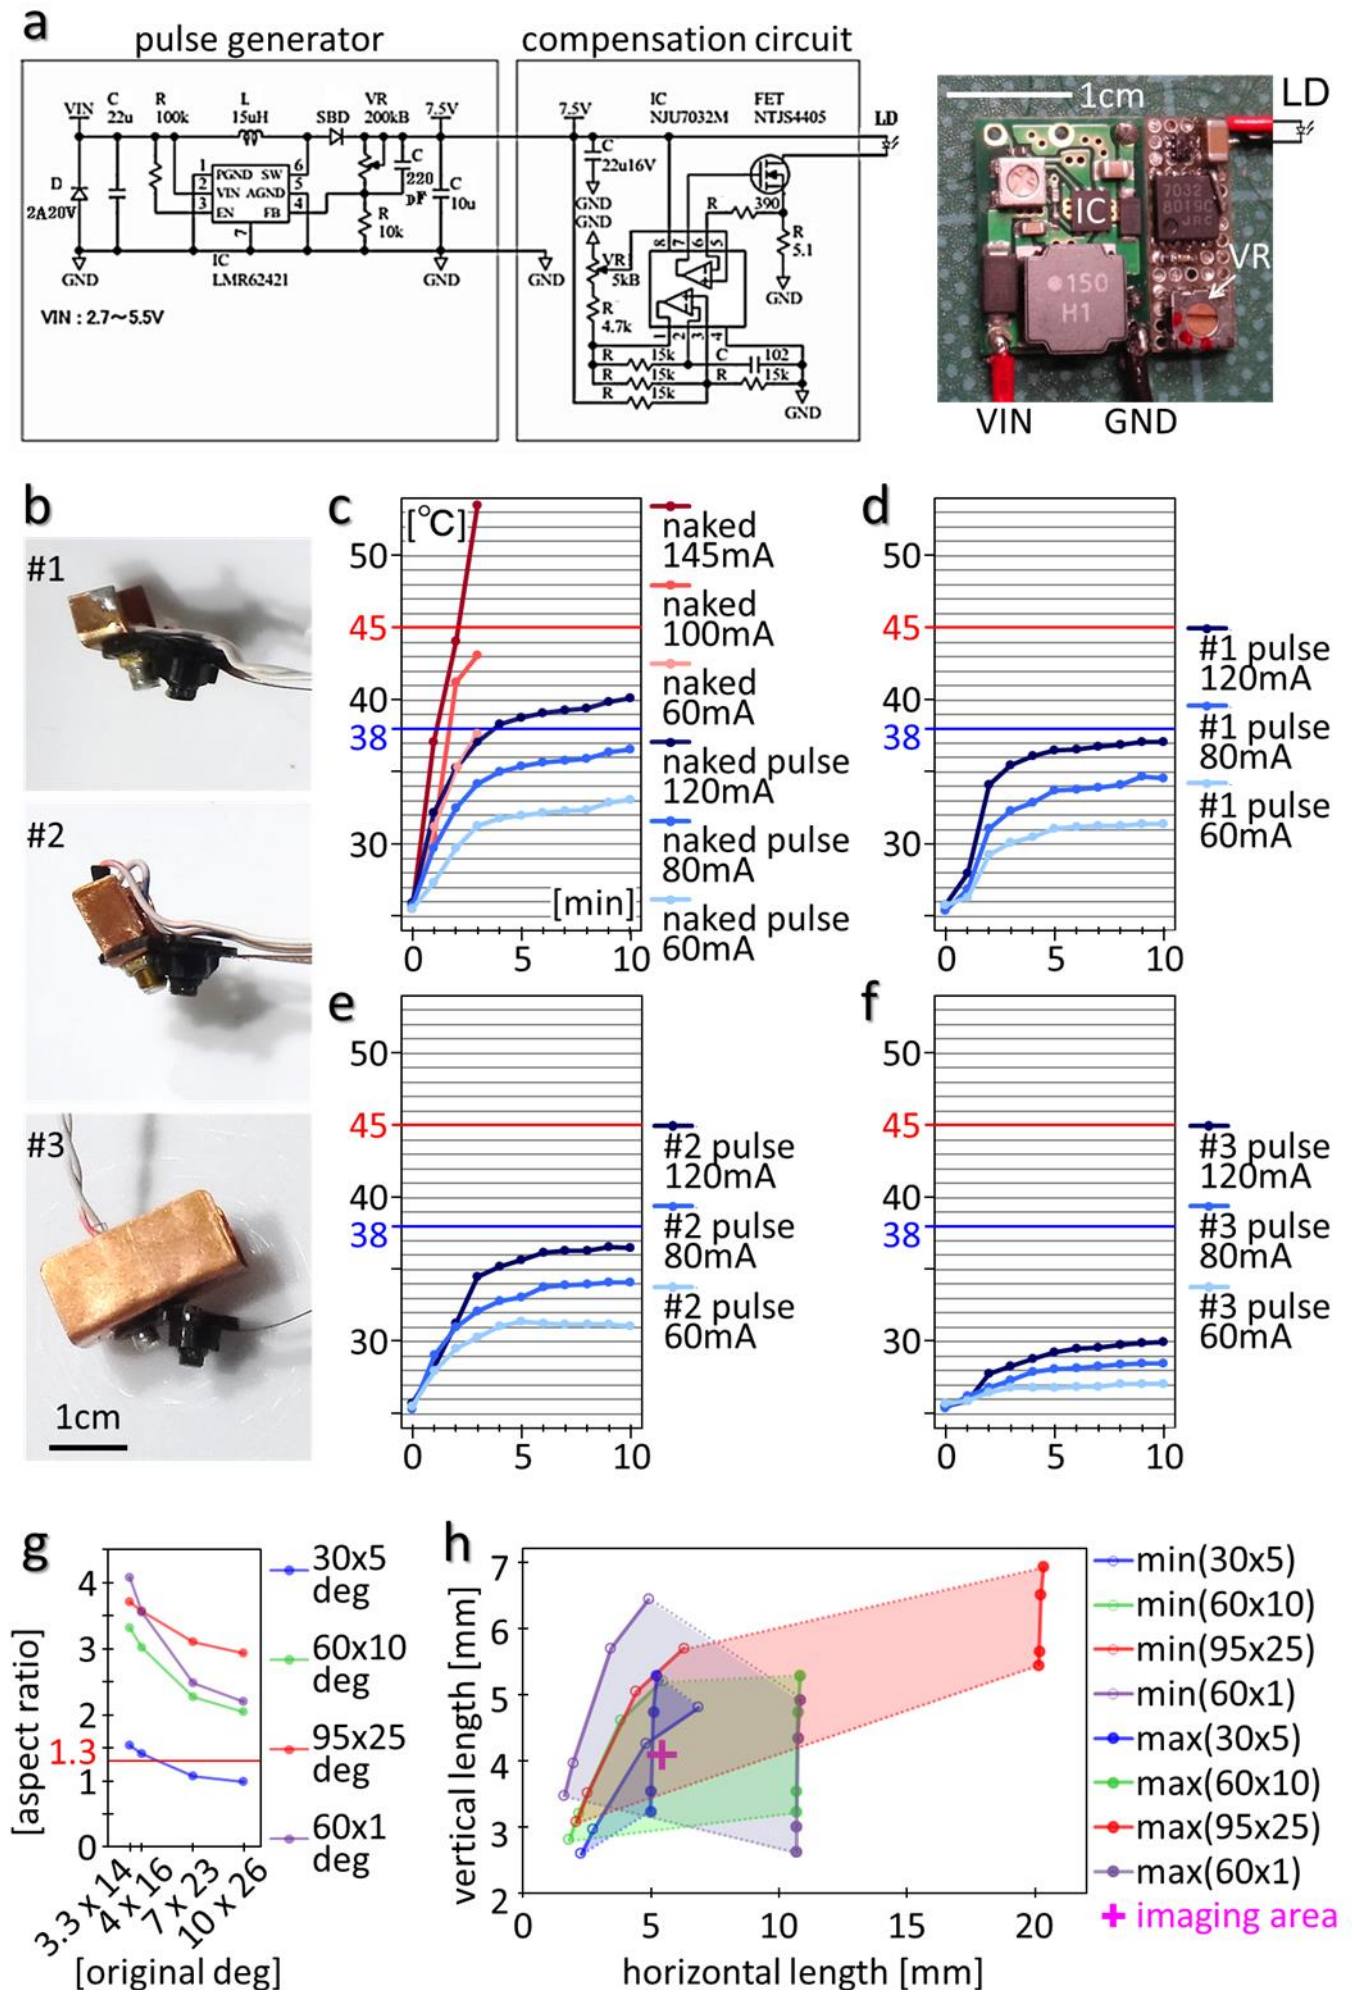

**Supplementary Fig. 4** Components: a pulse generator to drive a laser diode (LD), an external heat sink structure to suppress the temperature rise of LD, and a light shaping diffuser (LSD).

**(a)** The LD driver and its circuit diagram. To prevent a temperature rise of the LD due to continuous illumination, a LD driver (ImageTech, Co., Japan) was regulated by a pulse generator which turns the LD on and off at a high-speed. In the circuit diagram, the left box shows an oscillator and the right box shows a compensation circuit. 32 kHz pulse is stably supplied to the LD. Since a source voltage allows 2.7-5.5 V input, the LD driver can be driven by an external power supply unit or also directly connected to the USB power supplying wire, which contributes to the miniaturization and simplification of the entire system. A CMOS operational amplifier was used in the compensation circuit for a constant current. MOS-FET (metal-oxide-semiconductor field-effect transistor) was used for an output enhancement as a switching element. Output power for LD can be controlled by a variable resistor (potentiometer) (VR, white arrow in right image). Therefore, it is possible to irradiate excitation light with a preferable output according to the observation target during the imaging. VIN, input voltage; GND, ground; C, capacitor; R, resistor; L, inductor; D, diode.

**(b)** A heat sink of variable size was attached to the LD of the HLC. #1/ #2/ #3 shows 146.7/ 194.7/ 889.2 mm<sup>2</sup> heat sinks, respectively.

**(c)** The temperature change of the LD (PL450B, OSRAM, Inc., Germany, threshold current 30 mA, maximum optical output power 100 mW, threshold current 30 mA, operating current <145 mA) was examined. The temperature of the metal housing of the LD attached to the heat sinks was measured using a thermocoupled probe. The room temperature was 25.5 °C. Blue or red horizontal lines in each graph indicates 38 or 45 °C respectively, as a typical mouse's body temperature or as a presumptive limit temperature at which irreversible damage is caused to the cell. When a constant current of 60, 100, or 145 mA was applied to the "naked" LD (no heat sink), its temperature rapidly exceeded 38 °C (c). In contrast, when a pulsed constant current (32 kHz) of 60, 80, 120 mA was applied using a pulse generator, the temperature of the naked LD increased more slowly, finally reaching a plateau level after 10 minutes, thus showing the effectiveness of the pulse drive for stable lighting by the LD and the prevention of a rapid temperature rise.

**(d-f)** The temperature of the LD with the heat sink was measured. These results indicate that the cooling efficiency by the heat sink is higher as its surface area increases. The temperature of the LD with every type of heat sink reached a plateau without exceeding 38 °C, even if they were driven at 120 mA. Therefore, the heat sink structure is effective for cooling the LD. Also, the time of LD with the #1 heat sink temperature to reach 95 % of its maximum temperature was more than twice as fast as that of the naked LD. From a practical viewpoint, we decided to use the #1 sink in our *in vivo* experiments.

It is necessary to change the current value of laser diode (LD) according to the observation target. The experimenter needs to dim the LD while observing the fluorescence of the target during the experiment. As far as using the HLC (image sensor is OV7690) with the CaMK2a-G-CaMP7 mouse, it was mainly used at under 60-80 mA in most cases. At this situation, the temperature is

33.0 - 36.5 °C and it is below the body temperature of the mouse, so we do not need the heat sink (c). Since the LD is not in contact with the mouse and it is installed away from the mouse, even if it reaches 40 °C at 120 mA, it is considered that there is practically no problem if lighting is limited to short time. On the other hand, it is considered preferable to use a heat sink if it is expected to be used for longer period at approximately 90 mA or more. In this condition, LD is expected to exceed the mouse body temperature (depending on the room temperature).

The heat sink suppresses the temperature rise above the room temperature, and shortens the time to reach the plateau, so it stabilizes the laser light quickly. Therefore, the experimenter can shorten the standby time associated with turning on and off the LD. In summary, if the experimenter emphasizes weight reduction of the HLC, it is not necessary to attach the heat sink. While, if the experimenter wishes to give priority to shortening the standby time, it is effective to attach the heat sink.

**(g, h)** The LD is used as the excitation light source of the HLC. The laser light from LD has a flat shape (lower leftmost panel in Fig. 2h). Therefore, the irradiation beam was processed by using a light shaping diffuser (LSD). In the right panel of Fig. 2g, the LD was tilted 30 degrees from the light axis of the camera and the paper was illuminated from a distance of 8 mm, which is the same condition as actually used in the HLC. As a control, we used a white LED that projected a round light bundle. The projected images by the white LED with a circle lens or LD (PLT5 488, OSRAM, Inc., Germany) were taken in the dark by a digital camera (COOLPIX P7100, Nikon, Inc., Japan) with ISO100, exposure time 1 second, and fixed focus. The oscillation threshold of the LD, PLT5 488, is 30 mA, and the maximum limit current is 150 mA. According to the specification, the original beam divergence changes in the range of 4 x 16 - 7 x 23 (at 75 mA) - 10 x 26 degrees (deg) depending on the amount of applied current. Since the LD is usually driven at 40-80 mA for *in vivo* imaging, the distribution of LD at 40 mA was first analyzed. In the upper line of Fig. 2h, the projected circle light by the white LED was processed to a horizontal ellipse shape with various LSDs; original, 30 x 5 deg, 60 x 10 deg, 95 x 25 deg, 60 x 1 deg. Similarly, the figures in the lower line show that the projected vertical elliptical light from LD was processed to horizontal ellipse shape. In the result of the light projection using the 60 x 10 deg LSD, the distribution of a yellow-colored area with a half-value intensity was within an inner red square which corresponds to the typical view field of the HLC (4.0 x 5.3 mm). Therefore, we thought that the light distribution processed by the 60 x 10 deg LSD most closely matches the region of the imaging field of the HLC.

Continuously, the aspect ratios of the diffusion angle of the projected beam by the various LSDs were calculated depending on the original divergences of the LD at different currents (g). And finally, the various projected ranges by the various diffusion angles were simulated (h).

The graph in (g) indicates the aspect ratio of the vertical and horizontal projected angle in each diffusion angle LSD (indicated by different colored lines) plotted against various divergences of the original LD beam at different currents. X-axis values are plotted according to the horizontal degree of the original LD beam. The aspect ratio of the imaging area of the CMOS, *i.e.* 640 x 480 pixels, is 1.33 (led line).

When the LSD is applied, the diffusion angle is approximated by the following formula:  $\sqrt{[(\text{light source divergence angle})^2 + (\text{LSD diffusion angle})^2]}$ , and the diffusion range is approximated by the following formula : (the distance to irradiated surface) x  $2 \tan\theta$ , where  $\theta$  is the half of the diffusion angle. In this experiment, the light source position was tilted by 30 deg horizontally. Therefore, the distance to the irradiated surface was 8 mm x  $2/\sqrt{3}$ , and the horizontal diffusion range was also corrected by multiplying  $2/\sqrt{3}$ . From the measurement result based on the projected original image in Fig. 2h, the original beam divergence of LD was 3.3 x 14 deg at 40 mA. In the case of 3.3 x 14 deg, the shape tendency calculated by the corrected angle at various aspect ratios of the LSD coincides with the actual distribution in Fig. 2h.

As a result, a 30 x 5 deg LSD is the most preferable and 60 x 10 deg LSD is the secondarily preferable for all current ranges of the LD.

The graph in (h) indicates the various projected ranges (vertical, horizontal length) by the various diffusion angles of the LSD (indicated by different colored lines) at the minimum or maximum current of LD. The diffusion angle increases or decreases according to an increase or decrease of the current value. The minimum projected ranges with various LSDs by the minimum current were calculated based on the yellow-colored area of projected image of Fig. 2h, and are shown as “min (LSD variation)” on the right side of the graph. Similarly, the maximum projected ranges were estimated based on 3.3 x 14, 4 x 16, 7 x 23, 10 x 26 deg as a maximum original divergence, and are shown as “max (LSD variation)”. The four dots in the data for each LSD show the results in order of the current value. The colored area for each type of LSD indicates the projected range that can change from the min value to the max value. “Imaging area” (magenta cross in the graph) indicates the typical HLC imaging area (4.0 x 5.3 mm). As a result, all tested LSDs except the 30 x 5 deg LSD can cover the imaging area.

From these results, the 60 x 10 deg LSD is the most preferable for the LD of the HLC under the various assumed usage conditions.

## Supplementary Fig. 5

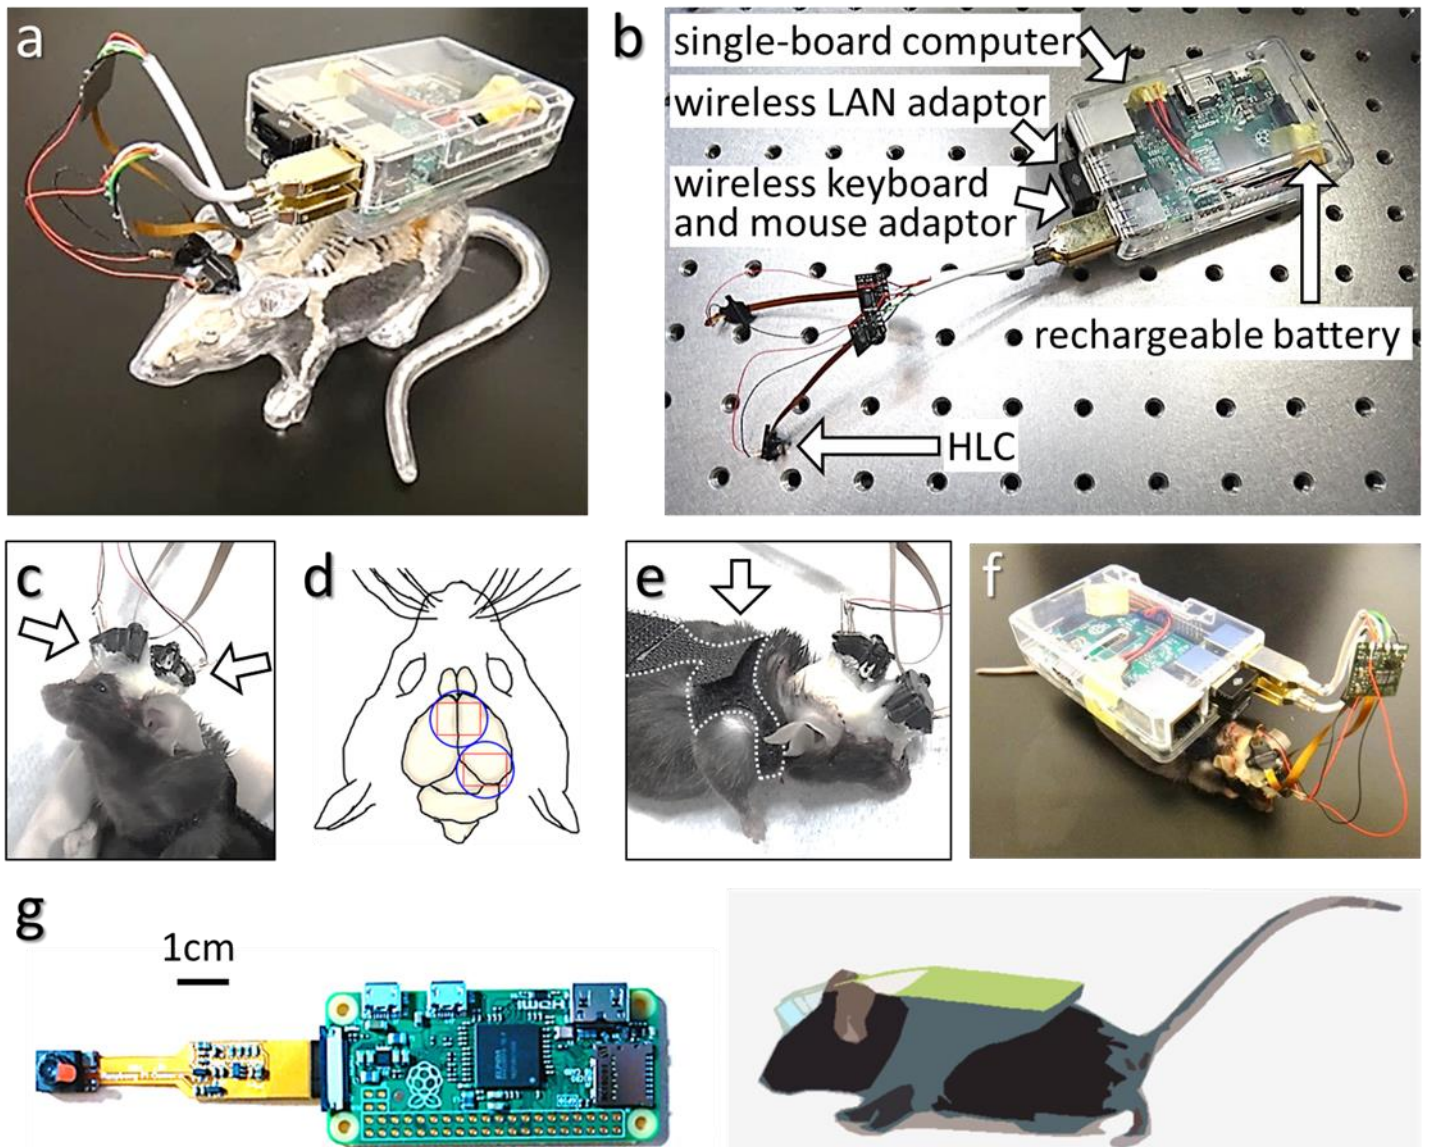

## **Supplementary Fig. 5** Wearable on-demand wireless imaging system using single-board computers.

An on-demand device is preferable for real-time observation of natural behaviors. Therefore, we constructed several types of wearable wireless units by using single-board computers. The CMOS image sensor used in the HLC is more compact and can work on lower power than a CCD (charge-coupled device), and is suitable for wireless control.

**(a, b)** Examples of a wearable on-demand wireless imaging system are shown. Dual HLCs were applied to the visual cortex of both hemicephalons on the rodent maquette (a). A Raspberry Pi 2 model B (Raspberry Pi Foundation, UK) was used as a main single-board computer (b). This multi imaging system is composed of the HLCs and adaptors for wireless LAN, keyboard, and mouse. Therefore, it can autonomously perform imaging and recording, and accept control from other PCs as a slave and send real-time video by remote operation. The wireless multi imaging system whose weight is 48 g can run for approximately 6–10 minutes with a rechargeable battery. The operating time can be extended depending on battery capacity.

**(c)** An example of multiple uses of the HLC is shown (see for detail [Supplementary Fig. 1c, d](#)).

**(d)** A schematic image of the applied position of (c) where the frontal or occipital cortical area including the motor or visual cortex is shown. The blue circle and red square indicate the spacer position and the imaging area, respectively.

**(e)** The image indicates the mouse wearing a vest to attach the device. In order for the mouse to move freely, it is necessary to carry the unit on its back (see also schematic image in (g)).

**(f)** An example of the wireless multiple imaging system (a) applied to a C57BL/6 line mouse. However, the weight and size of this type of system are slightly large and heavy for the tiny body of mouse. For instance, the ICR mice line that has a relatively large body size, a rat, or other large animals will be suitable for this wireless system.

**(g)** The system can be scaled down by using Raspberry Pi Zero as shown. Raspberry Pi Zero is smaller and lighter than Pi 2, approximately 1/12 by volume. Therefore, this type of wearable wireless imaging system will be more suitable for small animals such as the C57BL/6 line mouse.



## Supplementary Fig. 6

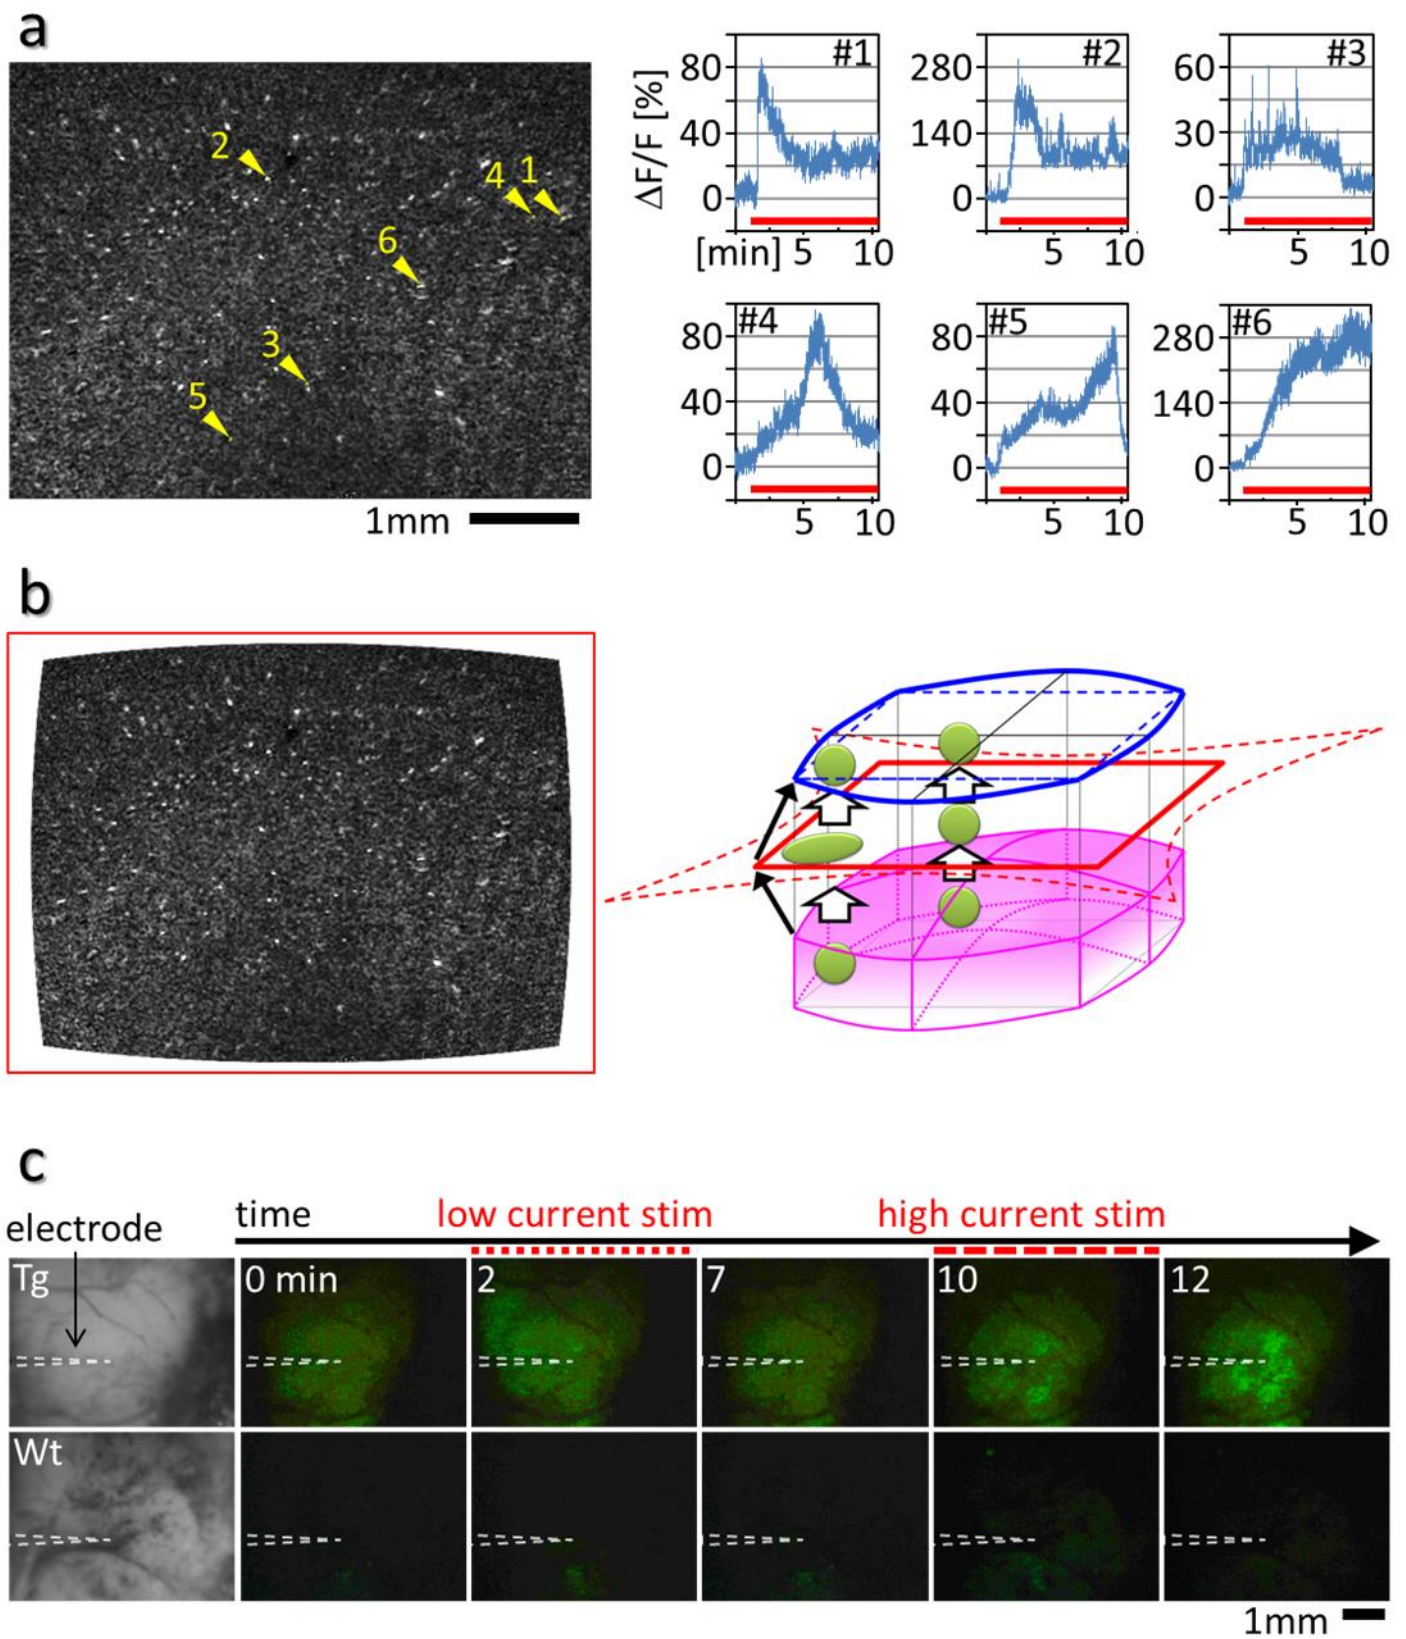

**Supplementary Fig. 6** The HLC can visualize intracellular  $\text{Ca}^{2+}$  dynamics of individual cells in 3D culture and artificially evoked neuronal activities by electrostimulation in the deep cerebral layer.

**(a)** The results of individual analysis of the  $\text{Ca}^{2+}$  imaging by the HLC of the 3D cultured Hela cells that were transfected with the G-CaMP6 gene (Fig. 4a) are shown. The 106 fluorescence spots in the imaging movie (10 frame/sec, 10 min) were selected randomly as a 1 or 4 pixels ROI. The mean of fluorescence intensity (FI) changes at each ROI and the change rate of FI ( $\Delta F/F$ ) was calculated as  $(F-F_0)/F$ , where  $F_0$  is the mean FI of the first 10 frames in each ROI. The maximum  $\Delta F/F$  was 693.3 % in these ROIs. The positions of a representative 6 ROIs are shown by the arrowheads with numbers in the image of (a), and their  $\Delta F/F$  are shown in the graphs and movie (Supplementary Movie 4). The fluorescence intensity was increased after histamine administration (red line in the graph). The graphs are arranged in chronological order of the timing of the  $\Delta F/F$  peak appearance. The results indicate that the fluorescence functional cell imaging that represent the  $\text{Ca}^{2+}$  dynamics within each cell can be performed by the HLC at single-cell resolution.

For traditional 2D culture conditions without embedding into the extracellular matrix gel, the FI of the  $\text{Ca}^{2+}$  indicators usually promptly starts to increase just after histamine administration, or within 2 minutes at the latest (supplemental information in the previous study<sup>12</sup>). Under the 3D culture condition, however, the response may be delayed for longer periods depending on individual cells, sometimes as long as more than 10 minutes. Such a delayed response might depend on the depth of each cell because there should be a natural time lag in the diffusion of the histamine into the interior of the gel.

**(b)** The left image of (a) was corrected with DTV (television distortion) -3.9 % according to the result of Fig. 2a. Red square line indicates the image silhouette of (a). The right schematic diagram shows the correction process of the image. Magenta block indicates the thick convex image area of the HLC. The magenta gradient schematically represents the difference in fluorescence detection ability according to the result of Fig. 3e. A red line indicates the image silhouette of (a) that is taken by the HLC. The red broken line indicates the positive pincushion distorted actual image of the original object (magenta block). The blue line indicates the negative barrel compensated image of the red line, and also indicates the restored original image silhouette of the object (magenta block). The blue broken line indicates the predicted non-compensated image of the blue line, in other words, the positive barrel distorted image of the blue line. The distortions of the schematic images are enhanced for the ease of visual understanding. Black arrows show the same corner of each image. Green circles indicate the cells. The distortion is smaller near the center of the original object, while the distortion is larger near the edge of the original object. Therefore, the cell shape that was enlarged at the periphery in the image taken by the HLC is corrected to the original size in the restored image (left picture).

**(c)**  $\text{Ca}^{2+}$  imaging was performed by the HLC on the somatosensory cortex of the Thy1-G-CaMP7 transgenic mouse (Fig. 4c, d). We performed  $\text{Ca}^{2+}$  imaging with the HLC for evoked activity before

Ca<sup>2+</sup> imaging of other physiological neuronal activities. In this experiment, an HLC equipped with 450-460 nm LD, 30 x 5 deg LSD and >520 nm emission filter was used. After craniotomy, a coaxial electrode (TOG207-078, Unique Medical Co., Ltd., Japan) was inserted into the somatosensory cortical layer 5/6 at around 500-600  $\mu$ m depth using a micromanipulator. Then, a low or high tetanic stimulation (3 or 10 mA biphasic square waves, 100 Hz, duration 150  $\mu$ s, interval 10 ms, 3 sec.) was applied by using a stimulator (Isolated pulse stimulator 2100, A-M Systems Inc., USA). The time lapse imaging data of the *in vivo* experiment (Fig. 4c, d) on the Thy1-G-CaMP7 mouse (Tg) or wild type mouse (wt) for the negative control are shown. The electrode was inserted into the cortex from the side after the craniotomy. The HLC was attached on the cortex and then the Ca<sup>2+</sup> imaging was performed. When the stimulation was applied, the FI increased around the electrode in the Tg mouse, and the response was greater after high current than low current stimulation. In contrast, similar evoked signals were not detected in a wt mouse. These results indicate that the HLC can detect evoked neuronal activities in the cortex. Especially, it is thought that these changes of the FI mainly reflect the activities of the layer 5/6 pyramidal neurons and its neurites, because the Thy1 promoter is activated in those neurons predominantly.

In the wild-type case, slow and slight increases of the FI were also detected after stimulation. It is thought that this reaction reflects the intrinsic flavoprotein fluorescence in mitochondria<sup>41</sup>. The excitation peak is near 450 nm, therefore, the endogenous flavoprotein imaging depending on neural activity is also accessed by the HLC although the amount of FI change is much smaller, and the response speed is much slower than G-CaMP. Such flavin imaging would allow the functional neuronal imaging in the completely intact brain.

## Supplementary Fig. 7

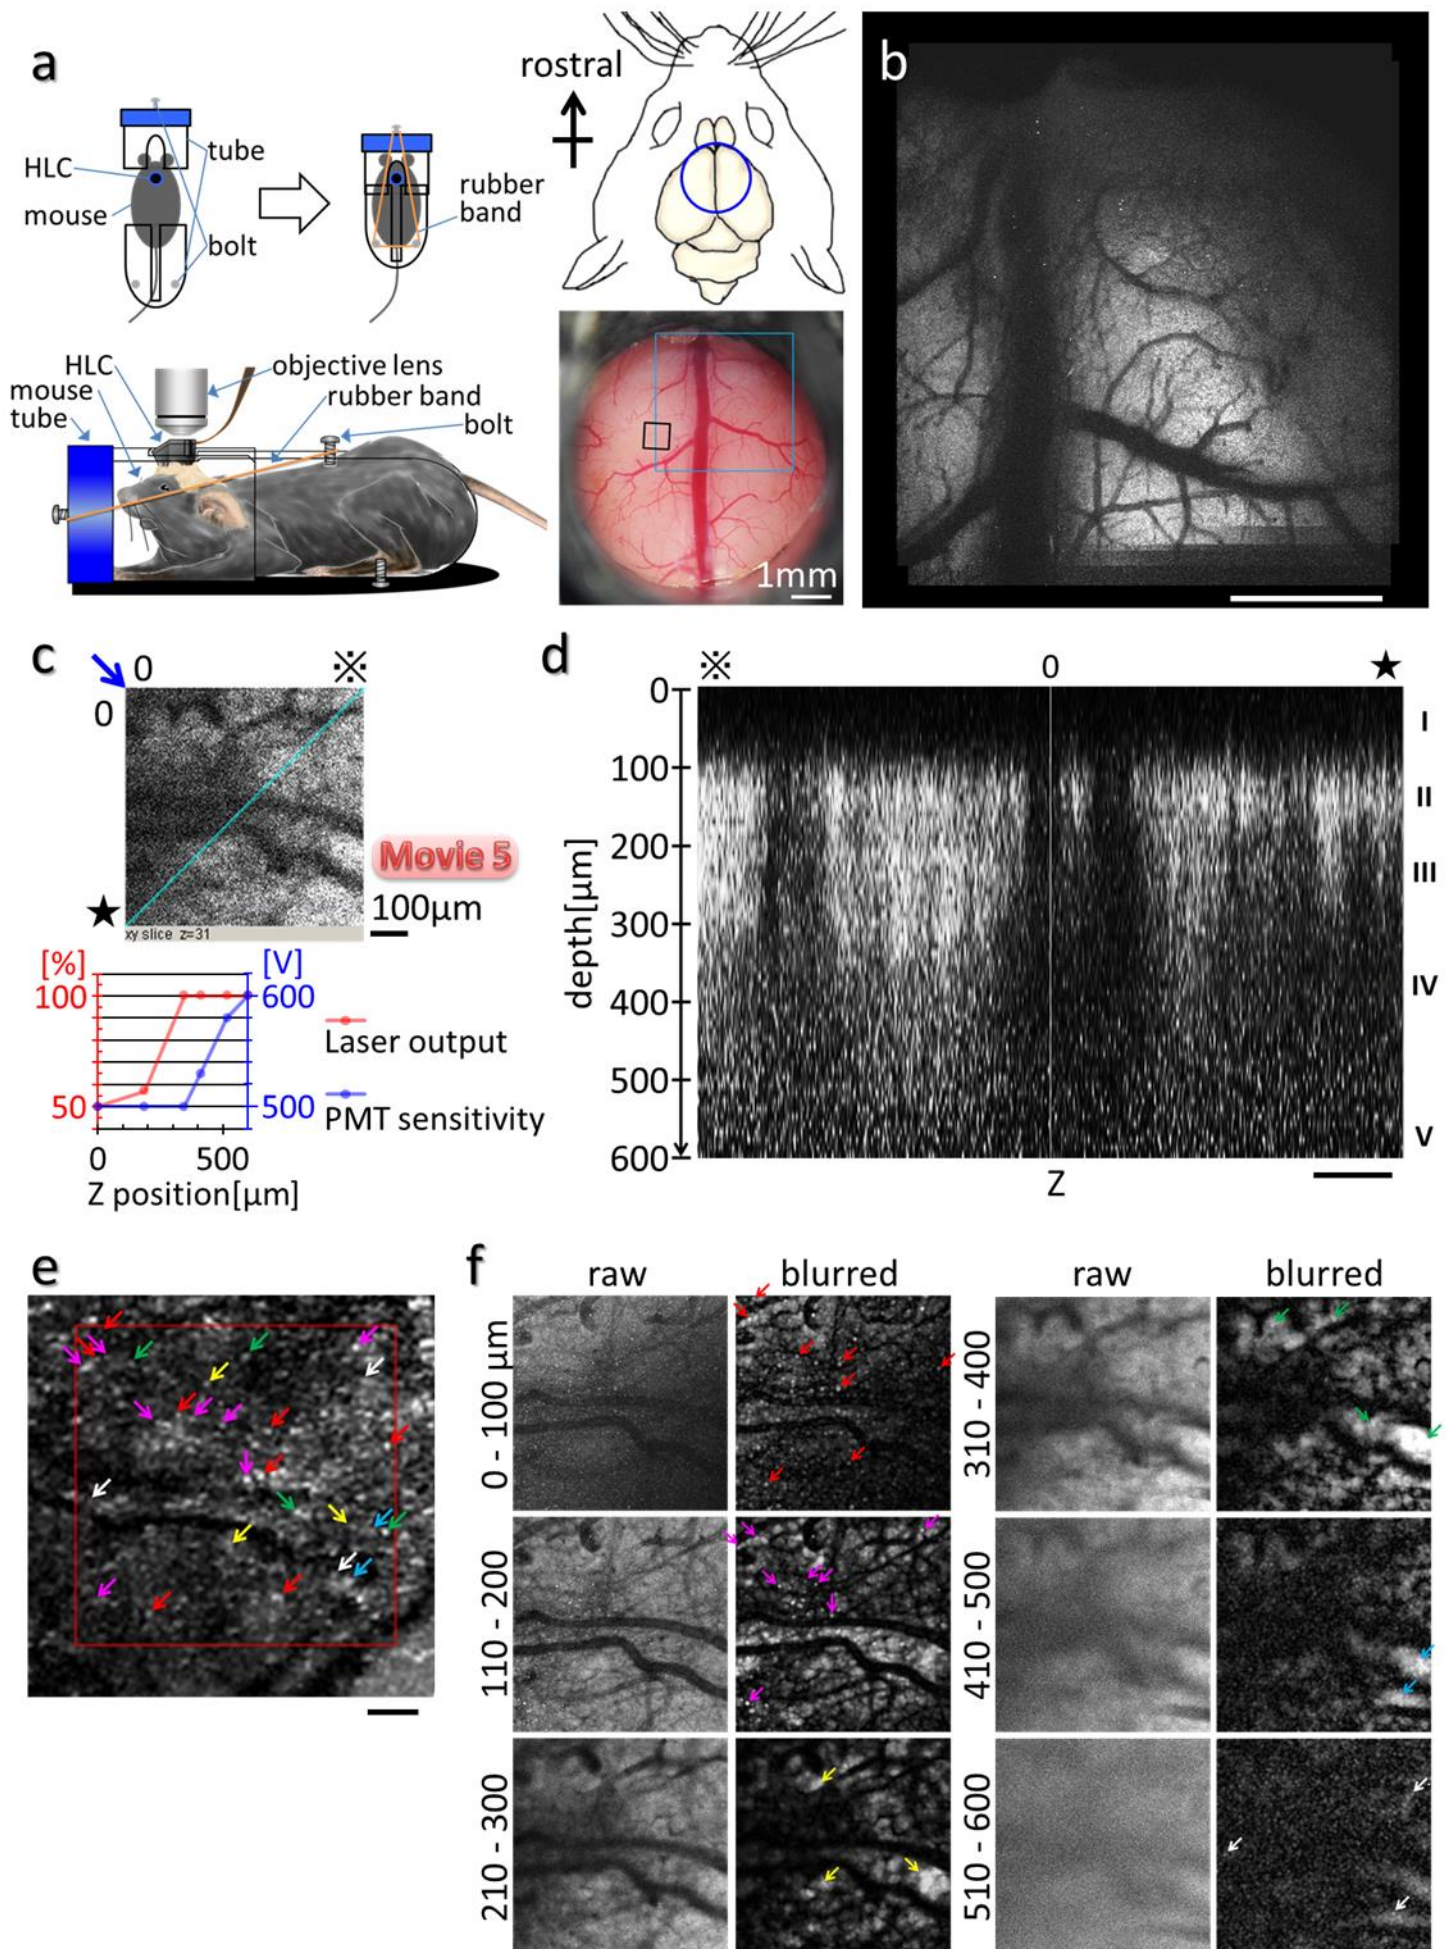

**Supplementary Fig. 7** The spacer apparatus with the cranial window allows the HLC and 2-photon microscope to perform chronic  $\text{Ca}^{2+}$  imaging at the same position in the same mouse.

**(a)** Fixation of the mouse head with the HLC on the head. After craniotomy and removal of the dura mater, the CaMK2a-G-CaMP7 mouse (mouse ID: # 3) was installed with the spacer apparatus with a cranial window on the frontal cortical region (see for detail [Supplementary Fig. 1a, b](#)). Then, fluorescence imaging was performed by using a 2-photon microscope (FVMPE-RS, Olympus, Co., Japan) at 5-6 days (b) and 33 days (c, d, f) after the surgical operation. The mouse was held in a plastic tube with the head fixed by the attachment of the HLC spacer to the hole of the tube (schematic image of left panel). The schematic image of the right upper panel indicates the location of the cranial window (blue circle). The right lower image was taken by a stereo microscope through the cranial window. Blue or black square indicates the imaging area of (b) or (c, d, f), respectively.

**(b)** The fluorescence imaging was performed in the awake condition with a 2-photon microscope using a galvano scanner. The view field was 3.18 x 3.18 mm, 512 x 512 pixels, 6.21  $\mu\text{m}/\text{pixel}$ , and images were captured 10 times at 1.01 sec/stack at the depth of 300  $\mu\text{m}$ . The acquired imaging data were merged. Misalignment caused by mouse movements between stacks was corrected manually, and a “maximum intensity projection”, *i.e.* a creation of the image where each pixel contains the maximum value over all images in the stacks, was performed. The result is shown in (b). Each fluorescent spot should represent excitatory neurons. Bar indicates 1 mm.

**(c)** The fluorescence imaging was performed with a 2-photon microscope using the galvano scanner in the anesthetized condition (upper panel). The view field is 636 x 636  $\mu\text{m}$ , 512 x 512 pixels, and the images at 0.917 sec/stack were captured to a depth of 600  $\mu\text{m}$  every 10  $\mu\text{m}$ . The image shows a horizontal section of the cerebral cortex at the 31th stack, that is, a depth of 300  $\mu\text{m}$ . The blue line and blue arrow indicate the position of the vertical section of the cortex and the direction of view in (d). The reference marks of two type asterisks correspond to the positions shown in (d). The lower graph indicates the imaging setting. Depending on the depth, the laser output and PMT (photomultiplier tube) sensitivity of the 2-photon microscope were changed.

Time-lapse imaging of the same view area in (c) at a 120  $\mu\text{m}$  depth of the anesthetized mouse cortex was performed with a 2-photon microscope using a resonant scanner. The 10 times speed movie that was captured at 389.72 ms/frame and averaged at every 10 frames is shown in [Supplementary Movie 5](#). Since the resonant scanner allows faster capture than the galvano scanner, the blinking of fluorescence spots is easier to recognize. It is thought that those fluorescence spots blinking represent the activity of excitatory neurons.

**(d)** Image shows the vertical cross section of the cortex (c). The length of 0-✂ and 0-★ are 900  $\mu\text{m}$ . Roman numerals on the right side of figure indicate the layer of the cortex. Bar indicates 100  $\mu\text{m}$ .

**(e, f)** The fluorescence image of the same mouse as (a) which was taken by the HLC under the freely-moving condition at 57 days after surgical operation is shown in (e). Red square shows the imaging area by 2-photon microscopy, which is the same as the black square in (a). Bar indicates 100  $\mu\text{m}$ . Each colored arrow roughly corresponds in position to the light spots in (f). The image of

(e) is the result of the processing as the following. The fluorescence movie data taken by the HLC for 5 minutes at 50 ms/frame (20 fps) was deconvoluted and background subtracted, and all frames were merged to one image by a maximum intensity projection.

In (f), the fluorescence images of the anesthetized mouse were taken by 2-photon microscopy. Bar indicates 100  $\mu\text{m}$ . The images at 1.00 sec/stack were captured to a depth of 600  $\mu\text{m}$  at every 10  $\mu\text{m}$  intervals (see for the Z axis reconstruction data in (d)). And then, images were superimposed every 100  $\mu\text{m}$  by the maximum intensity projection of each of 10 slices, as shown “raw”. The blurring with a radius of 3.8 pixels at the light spot of that raw imaging data was performed as shown “blurred” by using a Gaussian filter of ImageJ. We performed this blurring procedure to match the resolution (9.62  $\mu\text{m}/\text{pixel}$ ) by the HLC whose view field in this experiment is 4.62 x 6.16 mm, 480 x 640 pixels to the resolution (1.24  $\mu\text{m}/\text{pixel}$ ) by 2-photon microscope. The difference in resolution between the HLC and 2-photon microscope is 7.7 times, therefore the radius of 3.8 pixels blurring was performed to obtain similar images.

As a result, during the long-term housing, neuronal activity could be visualized using the HLC and also by conventional 2-photon microscopy through the cranial window of the spacer apparatus.

## Supplementary Fig. 8

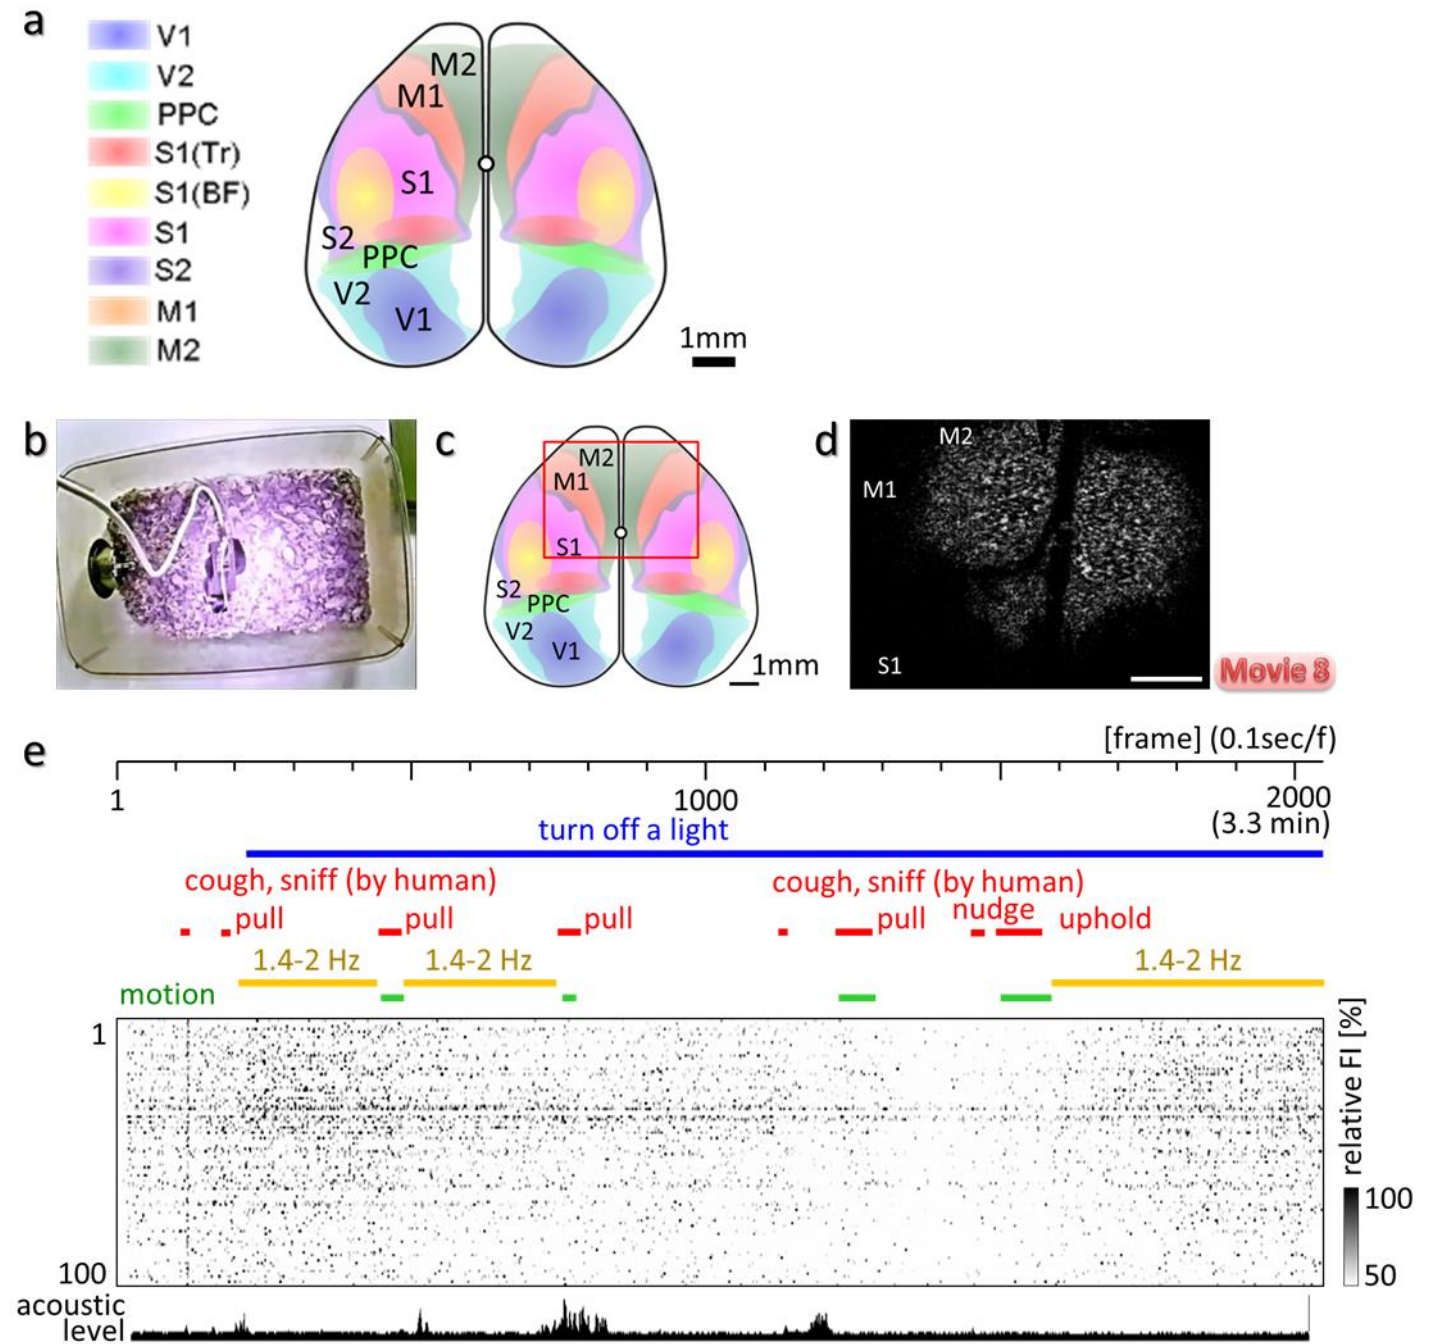

## Supplementary Fig. 8 Event related neuronal activity was observed in the frontal cortex in the freely moving condition

Ca<sup>2+</sup> imaging was performed with the HLC in the freely moving CaMK2a-G-CaMP7 mouse in the square cage. The behavior of the mouse was taken with an IR web camera placed above the cage.

**(a)** The schematic image shows the cerebral cortical map which was partially modified from the map<sup>37</sup> reconstructed from the serial coronal sections of the brain atlas<sup>36</sup>. Each abbreviation means V1/2, primary/secondary visual cortex; PPC (PtA), posterior parietal cortex (parietal association cortex); S1 (Tr/BF)/S2, primary (trunk/olfactory barrel field)/secondary somatosensory cortex; M1/2, primary/secondary motor cortex.

**(b)** The image shows the experimental setup.

**(c)** The schematic image of the HLC imaging area is shown (red square).

**(d)** The subtracted fluorescence image of the frontal cortex (c) in the CaMK2a-G-CaMP7 mouse taken by HLC under the freely moving condition (b) is shown. The raw movie (10 frame/sec) was subtracted by the averaged frame of the first 10 frames of the movie, and then the brightness and contrast was enhanced to observe neuronal activity in association with behavior as shown in (d, [Supplementary Movie 8](#)). Bar indicates 1 mm.

**(e)** 100 fluorescent spots of 4 pixels were picked up at random as representative ROIs from both hemispheres broadly based on the raw data. A temporal change of the FI in each ROI is shown by the raster plot. Several interventions were applied to the mouse during Ca<sup>2+</sup> imaging (notation in red). The bottom graph shows an ambient acoustic level. The spacer of the HLC was shielded from light by the additional liquid rubber coat, and the changes in the surrounding lighting had no direct influence on the imaging result. The blue line indicates the period of dark environment, and the mouse behavior could still be observed by the IR web camera. Since the HLC has an IR cut filter (<650 nm), IR lighting also had no direct influence on the imaging result. The green lines indicate mouse motion.

When pulling, nudging, and upholding the mouse body were repeatedly conducted during Ca<sup>2+</sup> imaging of the frontal cortex, neuronal activity changed in relation to these events. When the experimenter coughed near the mouse, transient and overall activity occurred in many ROIs. However, such a global reaction was not caused by a second cough, possibly due to acclimation. Broad slow synchronized wavelike activity propagated sometimes at the resting state during the periods indicated by yellow lines. Such a slow wave response was interrupted by a pull, and does not always occur during the resting period, which suggests that the phenomenon is not just noise. This slow oscillatory activity may be similar to the one observed during the inter trial periods<sup>43</sup>.



## Supplementary Fig. 9

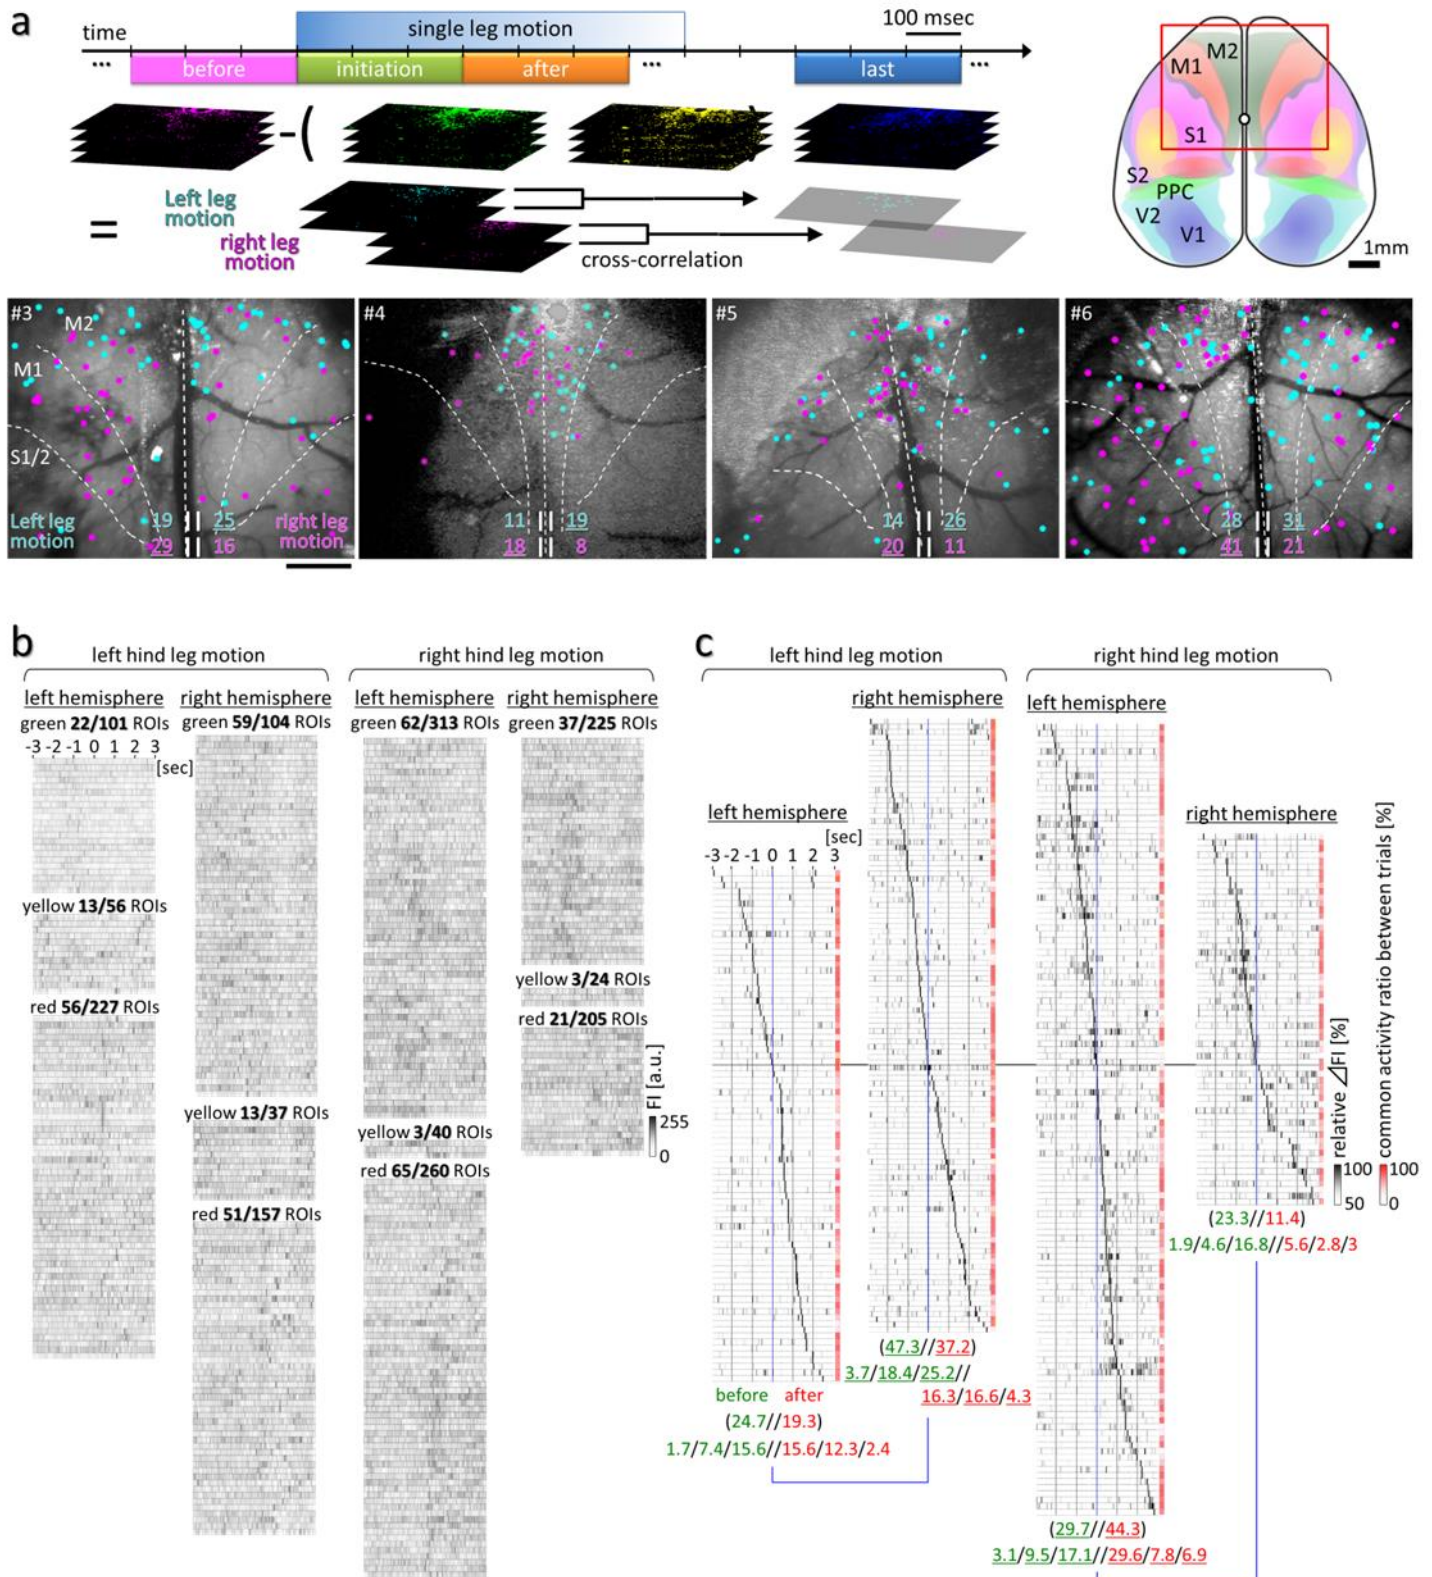

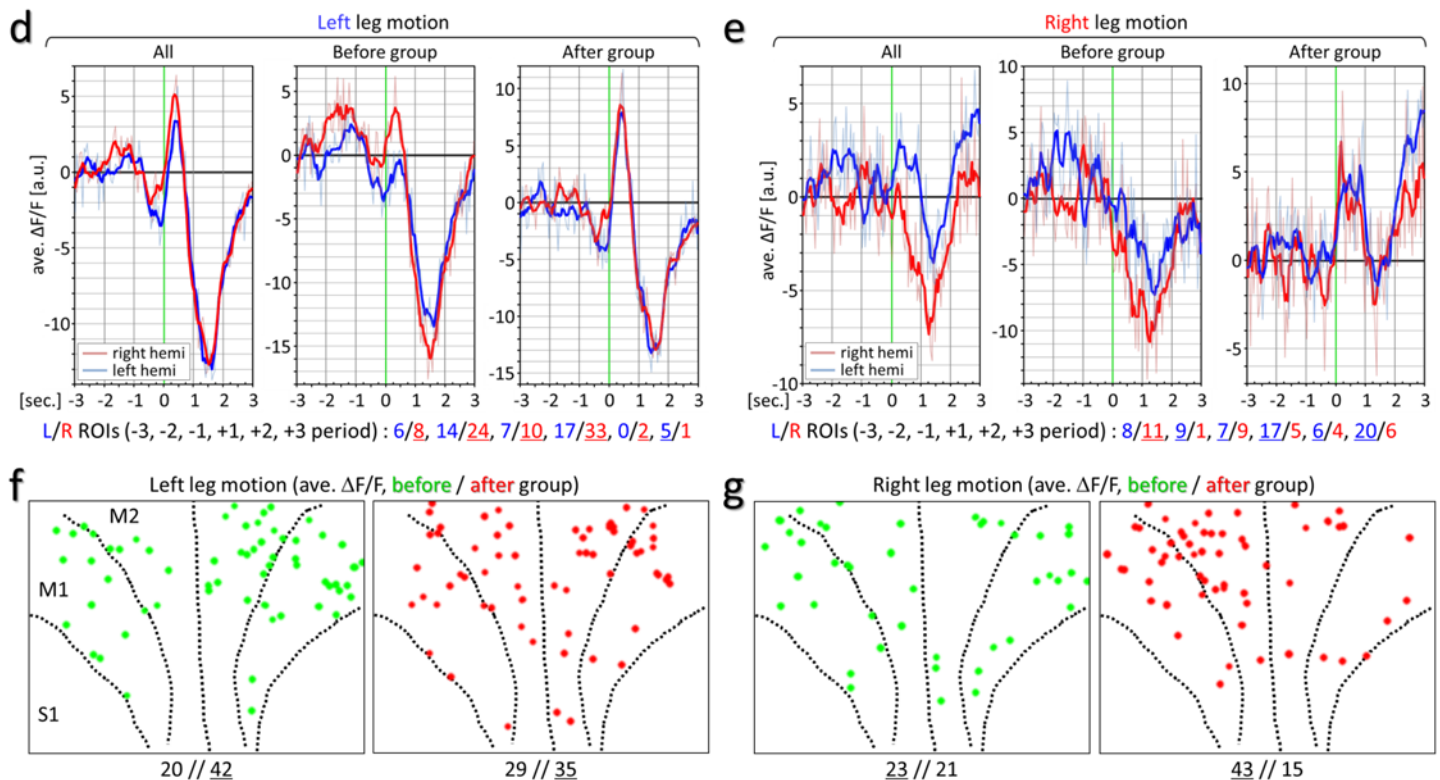

**Supplementary Fig. 9** Cross-correlation analysis and the relative  $\Delta F/F$  in the comprehensive quantitative analysis reveal the specific cell assemblies which represent a cascadic premotor activity during voluntary movement.

**(a)** The result shows the cross-correlation analysis of premotor activity. In the CaMK2a-G-CaMP7 mouse, 10 or 20 fps (frame per second)  $\text{Ca}^{2+}$  imaging was performed over the frontal cortex including the whole motor cortex by the restriction motion experiment and the HLC (Fig. 8a). The left schematic image indicates the process of the analysis method. The middle schematic image shows the imaging position by the HLC. The red square indicates the imaging area by the HLC, 5.0 x 6.5 mm. The activity positions of excitatory neurons during the 300 ms before the onset of the left or right hindleg motion were extracted in the process as described below. First, 4 periods for 300 ms during the left or right hindleg's voluntary movement were categorized as "before", "initiation", "after" and "last". For example, "before" or "initiation" was defined the period just before or after the onset of the motion, respectively. "After" was defined as the period just after "initiation". "Last" was defined as the period from 200 ms just after the motion stopping. Next, fluorescence imaging data from each of the 4 periods was subtracted by the data of the one frame just before each period to reduce the background. Those subtracted imaging movie data were converted to a one frame image by maximization, and then, the subtraction between each period, max of "before" – max of ["initiation" + "after" + "last"], was performed for each ROI. The result was expected to represent only premotor activity. Finally, the image of two discrete trials accompanying the left or right

hindleg's motion in the same mouse are shown for comparison in the lower images of (a). The results of 4 mice are shown (mouse ID: #1 - #4). Bar indicates 1 mm. Cyan or magenta dots indicate the neurons activated before the left or right hindleg motion. For example in #1 mouse, 19 and 25 neurons of the left and right hemisphere, respectively, were activated before the left leg motion. And 29 and 16 neurons of the left and right hemisphere, respectively, were activated before the right leg motion. These neurons seem to be more localized to M2 than M1, and are rarely present in the other areas such as the somatosensory cortex, and its localization is biased toward the contralateral side over the motion side.

The results of (b, c) show a part of the comprehensive quantitative analysis of the premotor activity in Fig. 8.

**(b)** The temporal value changes of FI, derived from the raw 20 fps  $\text{Ca}^{2+}$  imaging data, at ROIs in the subtracted image of Fig. 8e with  $>5\%$   $\Delta F/F$  are presented by a raster plot. The numbers at the top of each raster plot mean  $[>5\% \Delta F/F \text{ ROIs}] / [\text{all ROIs}]$ . The ROIs were classified by color codes (green, yellow and red) according to the criteria described in the legend of Fig. 8e. The yellow ROIs are double positive for both green and red characters.

**(c)** The data shows the temporal raster plot of relative FI change rates of (b) (relative  $\Delta FI$  [%]), and an averaged possibility of all kick events at each ROI (red boxes). The relative  $\Delta FI$  was calculated so that a minimum or maximum value was set to 0 or 100 for each ROI in data of (b). Then, the 50-100 % relative  $\Delta FI$  in each ROI was presented by the order of the peak point time. The possibility value was calculated based on whether the subtracted FI at each ROI in each kick event was positive (= 1) or negative (= 0). The averaged possibility values at each ROI in all kick events are indicated by red boxes at the right end of the raster plot line. The sum of possible values is indicated by the number under each raster plot. Green or red colored numbers mean the sum before or after the initiation of the motion. The bottom numbers mean the sums within each time period (-3 to -2 / -2 to -1 / -1 to 0 // 0 to 1 / 1 to 2 / 2 to 3 [sec]). Underline means the larger numbers compared to those on the other side of the hemisphere. These results also indicate the tendency that many active ROIs exist in the contralateral hemispheres from the motion side similar to the result in (a).

Next, an overall qualitative analysis was performed to eliminate the concern that accidentally large but rare activities might make unduly great contributions by maximization analysis.

**(d, e)** Left graphs indicate the averaged total  $\Delta F/F$  of all ROIs (b) during all left or right kick events.  $\Delta F/F$  was measured from raw data of each event at the ROIs (b) excluding those of the  $<50\%$  possibility and the somatosensory area. Then, the  $\Delta F/F$  of 11 or 10 trials were all averaged for each hemisphere. The middle or right graphs indicate the averaged total  $\Delta F/F$  of the specific cell assembly whose peak of  $\Delta F/F$  appeared before or after the initiation of the leg movement (abbreviated as "before group", "after group"). Bold red and blue lines indicate the mean of FI of each 5 frames. The bottom numbers indicate the numbers of the ROIs in the left or right hemisphere within each time period (-3 to -2 / -2 to -1 / -1 to 0 // 0 to 1 / 1 to 2 / 2 to 3 [sec]). The

underlines mean that the number is larger than on the other side. As a result, the lateralized activity was observed, especially at a period from -2 to +2 sec, just before and after the initiation of the motion in left graphs.

These three differential activities are also basically observed in the middle graphs representing the result of the “before group” cell assembly. Surprisingly, however, in the “after group” cell assemblies (right graphs), there was almost no difference in the left-right activities at periods from 0 to +2 sec. In contrast, the “before group” cell assemblies (middle graphs) indicate the different left-right activities before and after the onset of the motion.

In conclusion, our data suggest that motor planning for the left or right hindleg specific movements has been already completed by the lateralized activation of the “before group” cell assembly before the onset of the movement which lasts even after the initiation of the movements. **(f, g)** The “before group” and “after group” cell assemblies of (d, e) were plotted on the schematic diagram of the motor cortical area whose regional compartments are the same as the image of [Fig. 8d](#). The bottom numbers mean the numbers of the ROIs in the left or right hemisphere. The underlines mean that the number is larger than on the other side. As a result, the tendency of the lateralized distribution also appears in the overall qualitative analysis similarly to visual judgment, cross-correlation analysis, and comprehensive quantitative analysis.

In summary, lateralized premotor activities seem to start from M2 on each opposite side of the hemisphere, and the activities propagate to M1 and the somatosensory region. The trends of our results are largely consistent among all the different analyses that were conducted in this paper. The result that the volitional movement originates from M2 is consistent with previous reports and supports them<sup>18,44-46</sup>. The pre- and post-motor activities in M1 have been occasionally pointed out to be non-lateralized<sup>17,47,50</sup>, and even ipsilateral<sup>49,50</sup>. In fact, the “after group” cell assemblies of (d, e) show bilateral non-lateralized activity during the period from 0 to +2 sec. However, the “before group” cell assemblies of (d, e) represent differential activity, and the 2D distribution study in [Fig. 8f](#) showed that the pre- and post-motor activities in M1 are also lateralized similarly as well as in M2. Therefore, we conclude that M1 activity is lateralized.

The lateralized premotor activity at just before the initiation of the motion (-0.5 to 0 sec) probably represents the start of a direct motor command in the neurons projecting to motor neurons controlling the muscle, and the period includes a point of no return in vetoing the motion (around -0.2 sec)<sup>51</sup>. The direct activity in M1 occurs 50 to 80 ms before muscle movement<sup>52</sup>.

**Supplementary Movie 1** Examples of imaging the freely moving mouse wearing the HLC and spacer apparatus ([Fig. 1c](#)) under various conditions.

**Supplementary Movie 2**  $\text{Ca}^{2+}$  imaging by the HLC over the occipital cortex of an awake CaMK2a-G-CaMP7 mouse ([Fig. 1d](#)).

In the movie, (a) shows a movie where the background of the raw imaging movie (10 frame/sec) was subtracted by using ImageJ with a sliding paraboloid (curvature radius is 200 pixels), and was deconvoluted. (b) is one frame of the movie (a). (c) is the magnified movie of the inset shown in (b). (d) is the same as (b). (e) was made by subtracting the FI of each pixel with the average of the FI of the same pixel during the first 10 times.

**Supplementary Movie 3** The procedure for counting the number of blinking spots in the view field of [Fig. 1d](#).

In the movie, (a) shows the maximized movie that 8 movies of 1 min were merged by taking the maximum FI for each pixel. (b), (c) show the same image of [Supplementary Fig. 3a, b](#), respectively.

**Supplementary Movie 4** x10  $\text{Ca}^{2+}$  imaging by the HLC on the 3D cultured G-CaMP6-Hela with histamine administration ([Supplementary Fig. 6a](#), raw fluorescence image is shown in [Fig. 4a](#)).

**Supplementary Movie 5** x20  $\text{Ca}^{2+}$  imaging with a 2-photon microscope over the motor cortex of the anesthetized CaMK2a-G-CaMP7 mouse ([Supplementary Fig. 7c](#)).

**Supplementary Movie 6** x100  $\text{Ca}^{2+}$  imaging by the HLC on the somatosensory cortical area of the anesthetized Thy1-G-CaMP7 mouse ([Fig. 4d](#), raw fluorescence time-lapse image is shown in [Supplementary Fig. 6c](#)).

**Supplementary Movie 7** Magnified  $\text{Ca}^{2+}$  imaging by using the HLC with short spacer in the freely moving mouse.

$\text{Ca}^{2+}$  imaging of the visual cortex of the CaMK2a-G-CaMP7 mouse was performed by the HLC with the short spacer under the freely moving condition. The 20-fps movie was magnified by the optical zoom (x 2 in comparison with [Supplementary Fig 3](#)) and the digital zoom (x 4) is shown ([Fig. 5](#)).

**Supplementary Movie 8** The Ca<sup>2+</sup> imaging by the HLC of the frontal cortex in the freely moving CaMK2a-G-CaMP7 mouse ([Supplementary Fig. 8b, d](#)).

The left and right movies show a behavior movie of the mouse and the subtracted and averaged Ca<sup>2+</sup> imaging movie, respectively.

**Supplementary Movie 9** x1/10 Ca<sup>2+</sup> imaging by the HLC on the motor cortical area of the awake CaMK2a-G-CaMP7 mouse ([Fig. 8b](#)).

Left/ middle/ right movies show a behavior movie of the mouse, the raw Ca<sup>2+</sup> imaging movie, and the marked raw Ca<sup>2+</sup> imaging movie, respectively. In the right movie, the magenta or green dots mean the neuronal activities which start during the before (-4 to 0 sec) or after (0 to +4 sec) the initiation of the motion. Several arrows indicate the dots and its corresponding positions.

**Supplementary Movie 10** Ca<sup>2+</sup> imaging by the single and dual HLC under the freely moving condition.

Real-time Ca<sup>2+</sup> imaging of the awake CaMK2a-G-CaMP7 mouse by the single HLC of the frontal cortical area ([Supplementary Fig. 2d](#)) or by the dual HLC of the frontal and occipital cortical area ([Supplementary Fig. 1d](#)) were performed. The movie shows 30-fps captures of the video images displayed on the PC monitor. Judging from the orientation position of the blood vessel, the vibration induced by mouse's movements is not recognized and the view field does not change. Also, even if the two HLCs are used, the movement of the mouse is not impaired.
